# Supplementary material for: Mapping Human Dimensions of Climate Change Research in the Canadian Arctic
Source: Springer Nature journal article supplement (doi:10.1007/s13280-012-0336-8), 2012-07-24
Supplement: MOESM1 [file 13280_2012_336_MOESM1_ESM.docx]

**Electronic Supplementary Material**

**Table S1: Search terms applied to each database**

| Geographic terms | (nunavut or baffin or kivalliq or kitikmeot or “arctic bay” or arviat or “baker lake” or “bathurst inlet” or “cambridge bay” or “cape dorset” or “chesterfield inlet” or “clyde river” or “coral harbour” or “gjoa haven” or “grise ford” or “hall beach” or “iglulik” or Iqaluit or kimmirut or kugluktuk or pangnirtung or kugaaruk or “pond inlet” or qikiqtarjuaq or “rankin inlet” or “repulse bay” or resolute or sanikiluaq or taloyoak or “whale cove”) or (nunavik or akulivik or aupaluk or inukjuak or ivujivik or kangiqsualujjuaq or kangiqsujuaq or kangirsuk or kuujjuaq or kuujjuarapik or puvirnituq or quaqtaq or salluit or tasiujaq or umiujaq or whapmagoostui) or (nunatsiavut or labrador or nain or hopedale or “northwest river” or rigolet or makkovik or postville “happy valley-goose” or “mud lake”) or (ungava basin or “hudson bay” or “davis strait” or “james bay” or “foxe basin” or “hudson strait” or “gulf of boothia” or “Frobisher bay”) or inuit or (“Bassin de la Baie d’Ungava” or “Baie d’Hudson” or “Détroit de Davis” or “Arctique” or “Régions circumpolaires”) |
| --- | --- |
|  | AND |
| Qualifier | arctic or “indigenous knowledge” or “traditional knowledge” or “traditional ecological knowledge” OR “Connaissances indigènes” or “Savoirs indigènes” or “Connaissances autochtones” or “Savoirs autochtones” or “Connaissances traditionnelles” or “Savoirs traditionnels” or “Connaissances écologiques traditionnelles” or “Savoirs écologiques traditionnels” or “Détroit de Davis” or “Arctique” or “Régions circumpolaires” |

**Table S2: Included Articles**

1. Aporta, C. (2002). Life on the ice: Understanding the codes of a changing environment. *Polar Record, 38*(207), 341-354.

2. Aporta, C. (2003). New ways of mapping: Using GPS mapping software to plot place names and trails in Igloolik (Nunavut). *Arctic, 56*(4), 321-327.

3. Aporta, C. (2009). The Trail as Home: Inuit and Their Pan-Arctic Network of Routes. *Human Ecology, 37*(2), 131-146.

4. Armitage, D. R. (2005). Community-based Narwhal management in Nunavut, Canada: Change, uncertainty, and adaptation. *Society & Natural Resources, 18*(8), 715-731.

5. Atkinson, D. M., Deadman, P., Dudycha, D., & Traynor, S. (2005). Multi-criteria evaluation and least cost path analysis for an arctic all-weather road. *Applied Geography, 25*(4), 287-307.

6. Barber, D. G., & Iacozza, J. (2004). Historical analysis of sea ice conditions in M'Clintock channel and the Gulf of Boothia, Nunavut: Implications for ringed seal and polar bear habitat. *Arctic, 57*(1), 1-14.

7. Barber, D. G., Lukovich, J. V., Keogak, J., Baryluk, S., Fortier, L., & Henry, G. H. R. (2008). The Changing Climate of the Arctic. *Arctic, 61*, 7-26.

8. Bates, P. (2007). Inuit and scientific philosophies about planning, prediction, and uncertainty. *Arctic Anthropology, 44*(2), 87-100.

9. Beaumier, M., & Ford, J. (2010). Food insecurity among inuit women exacerbated by socioeconomic stresses and climate change. *Canadian Journal of Public Health, 101*(3), 196-202.

10. Berkes, F. (2007). Understanding uncertainty and reducing vulnerability: lessons from resilience thinking. *Natural Hazards, 41*, 283 - 295.

11. Berkes, F., Berkes, M. K., & Fast, H. (2007). Collaborative integrated management in Canada's north: The role of local and traditional knowledge and community-based monitoring. *Coastal Management, 35*(1), 143-162.

12. Bird, S. M., Wiles, J. L., Okalik, L., Kilabuk, J., & Egeland, G. M. (2008). Living with diabetes on Baffin Island: Inuit storytellers share their experiences. *Canadian Journal of* *Public Health-Revue Canadienne De Sante Publique, 99*(1), 17-21.

13. Bradley, M. J. (2005). Climate related events and community preparedness. *Int J Circumpolar Health, 64*(5), 438-439.

14. Bravo, M. T. (2009). Voices from the sea ice: the reception of climate impact narratives. *Journal of Historical Geography, 35*(2), 256-278.

15. Budreau, D., & McBean, G. (2007). Climate change, adaptive capacity and policy direction in the Canadian North: Can we learn anything from the collapse of the east coast cod fishery? *Mitigation and Adaptation Strategies for Global Change, 12*, 1305-1320.

16. Catto, N. R., & Parewick, K. (2008). Hazard and vulnerability assessment and adaptive planning: mutual and multilateral community researcher communication, Arctic Canada. *Geological Society, London, Special Publications, 305*, 123-140.

17. Chan, H. M., Fediuk, K., Hamilton, S., Rostas, L., Caughey, A., Kuhnlein, H., et al. (2006). Food security in Nunavut, Canada: barriers and recommendations. *Int J Circumpolar Health, 65*(5), 416-431.

18. Clark, D. A., Lee, D. S., Freeman, M. M. R., & Clark, S. G. (2008). Polar Bear Conservation in Canada: Defining the Policy Problems. *Arctic, 61*(4), 347-360.

19. Constant, P., Poissant, L., Villemur, R., Yumvihoze, E., & Lean, D. (2007). Fate of inorganic mercury and methyl mercury within the snow cover in the low arctic tundra on the shore of Hudson Bay (Quebec, Canada). *Journal of Geophysical Research-Atmospheres, 112*(D8).

20. Crompton, A. E., Obbard, M. E., Petersen, S. D., & Wilson, P. J. (2008). Population genetic structure in polar bears (Ursus maritimus) from Hudson Bay, Canada: Implications of future climate change. *Biological Conservation, 141*(10), 2528-2539.

21. De Fabo, E. C. (2005). Arctic stratospheric ozone depletion and increased UVB radiation: potential impacts to human health. *Int J Circumpolar Health, 64*(5), 509-522.

22. Dempson, B. J., Shears, M., Furey, G., & M., B. (2008). Resilience and stability of north Labrador Arctic charr, Salvelinus alpinus, subject to exploitation and environmental variability. *Environmental Biology of Fishes 83*(1), 57-67.

23. Dery, S. J., Hernandez-Henriquez, M. A., Burford, J. E., & Wood, E. F. (2009). Observational evidence of an intensifying hydrological cycle in northern Canada. *Geophysical Research Letters, 36*.

24. Dommergue, A., Ferrari, C. P., Gauchard, P. A., Boutron, C. F., Poissant, L., Pilote, M., et al. (2003). The fate of mercury species in a sub-arctic snowpack during snowmelt.*Geophysical Research Letters, 30*(12).

25. Donaldson, S. G., Van Oostdam, J., Tikhonov, C., Feeley, M., Armstrong, B., Ayotte, P., et al. (2010). Environmental contaminants and human health in the Canadian Arctic. *Science of the Total Environment*(Article in Press).

26. Dowsley, M. (2007). Inuit perspectives on polar bears (*Ursus maritimus*) and climate change in Baffin Bay, Nunavut, Canada. *Research and Practice in Social Sciences, 2*(2), 53 - 74.

27. Dowsley, M. (2009a). Community clusters in wildlife and environmental management: using TEK and community involvement to improve co-management in an era of rapid environmental change. *Polar Research, 28*(1), 43-59.

28. Dowsley, M. (2009b). Inuit-organised polar bear sport hunting in Nunavut territory, Canada. *Journal of Ecotourism, 8*(2), 161-175.

29. Dowsley, M., & Wenzel, G. (2008). "The Time of the Most Polar Bears": A co-management conflict in Nunavut. *Arctic, 61*(2), 177-189.

30. Drinkwater, K. F. (2005). The response of Atlantic cod (Gadus morhua) to future climate change. *ICES Journal of Marine Science, 62*(7), 1327-1337.

31. Dumas, J. A., Flato, G. M., & Brown, R. D. (2006). Future projections of landfast ice thickness and duration in the Canadian Arctic. *Journal of Climate, 19*(20), 5175-5189.

32. Durner, G. M., Douglas, D. C., Nielson, R. M., Amstrup, S. C., McDonald, T. L., Stirling, I., et al. (2009). Predicting 21st-century polar bear habitat distribution from global climate models. *Ecological Monographs, 79*(1), 25-58.

33. Dyck, M. G. (2007). Community monitoring of environmental change: College-based limnological studies at Crazy Lake (Tasirluk), Nunavut. *Arctic, 60*(1), 55-61.

34. Dyck, M. G., Soon, W., Baydack, R. K., Legates, D. R., Baliunas, S., Ball, T. F., et al. (2007). Polar bears of western Hudson Bay and climate change: Are warming spring air temperatures the "ultimate" survival control factor? *Ecological Complexity, 4*(3), 73-84.

35. Dyck, M. G., Soon, W., Baydack, R. K., Legates, D. R., Baliunas, S., Ball, T. F., et al. (2008). Reply to response to Dyck et al. (2007) on polar bears and climate change in western Hudson Bay by Stirling et al. (2008). *Ecological Complexity, 5*(289-302).

36. Eberle, J., Fricke, H., & Humphrey, J. (2009). Lower-latitude mammals as year-round residents in Eocene Arctic forests. *Geology, 37*(6), 499-502.

37. Ferguson, S. H., Stirling, I., & McLoughlin, P. (2005). Climate change and ringed seal (Phoca hispida) recruitment in western Hudson Bay. *Marine Mammal Science, 21*(1), 121-135.

38. Ferguson, S. H., Taylor, M. K., & Messier, F. (2000). Influence of sea ice dynamics on habitat selection by polar bears. *Ecology, 81*(3), 761-772.

39. Finley, K. J. (2001). Natural history and conservation of the Greenland whale, or bowhead, in the northwest Atlantic. *Arctic, 54*(1), 55-76.

40. Fisk, A. T., de Wit, C. A., Wayland, M., Kuzyk, Z. Z., Burgess, N., Robert, R., et al. (2005). An assessment of the toxicological significance of anthropogenic contaminants in Canadian arctic wildlife. *Science of the Total Environment, 351*, 57-93.

41. Ford, J. D. (2009a). Dangerous climate change and the importance of adaptation for the Arctic's Inuit population. *Environmental Research Letters, 4*(2).

42. Ford, J. D. (2009b). Vulnerability of Inuit food systems to food insecurity as a consequence of climate change: a case study from Igloolik, Nunavut. *Regional Environmental Change, 9*(2), 83-100.

43. Ford, J. D., & Berrang-Ford, L. (2009a). Food security in Igloolik, Nunavut: an exploratory study. *Polar Record, 45*(234), 225-236.

44. Ford, J. D., Berrang-Ford, L., King, M., & Furgal, C. (2010a). Vulnerability of Aboriginal health systems in Canada to climate change. *Global Environmental Change, 20*(4), 668-680.

45. Ford, J. D., Gough, W. A., Laidler, G. J., MacDonald, J., Irngaut, C., & Qrunnut, K. (2009b). Sea ice, climate change, and community vulnerability in northern Foxe Basin, Canada. *Climate Research, 38*(2), 137-154.

46. Ford, J. D., Pearce, T., Duerden, F., Furgal, C., & Smit, B. (2010b). Climate change policy responses for Canada's Inuit population: The importance of and opportunities for adaptation. *Global Environmental Change, 20*, 177-191.

47. Ford, J. D., Pearce, T., Gilligan, J., Smit, B., & Oakes, J. (2008a). Climate Change and Hazards Associated with Ice Use in Northern Canada. *Arctic Antarctic and Alpine Research, 40*(4), 647-659.

48. Ford, J. D., Pearce, T., Smit, B., Wandel, J., Allurut, M., Shappa, K., et al. (2007). Reducing vulnerability to climate change in the Arctic: The case of Nunavut, Canada. *Arctic, 60*(2), 150-166.

49. Ford, J. D., & Smit, B. (2004). A framework for assessing the vulnerability of communities in the Canadian arctic to risks associated with climate change. *Arctic, 57*(4), 389-400.

50. Ford, J. D., Smit, B., & Wandel, J. (2006a). Vulnerability to climate change in the Arctic: A case study from Arctic Bay, Canada. *Global Environmental Change-Human and Policy Dimensions, 16*(2), 145-160.

51. Ford, J. D., Smit, B., Wandel, J., Allurut, M., Shappa, K., Ittusarjuat, H., et al. (2008b). Climate change in the Arctic: current and future vulnerability in two Inuit communities in Canada. *Geographical Journal, 174*, 45-62.

52. Ford, J. D., Smit, B., Wandel, J., & MacDonald, J. (2006b). Vulnerability to climate change in Igloolik, Nunavut: what we can learn from the past and present. *Polar Record, 42*(221), 127-138.

53. Fugmann, G. (2009). DEVELOPMENT CORPORATIONS IN THE CANADIAN NORTH - EXAMPLES FOR ECONOMIC GRASSROOTS INITIATIVES AMONG THE INUIT. *Erdkunde, 63*(1), 69-79.

54. Furgal, C., & Seguin, J. (2006). Climate change, health, and vulnerability in Canadian northern Aboriginal communities. *Environmental Health Perspectives, 114*(12), 1964-1970.

55. Gantner, N., Muir, D. C., Power, M., Iqaluk, D., Reist, J. D., Babaluk, J. A., et al. (2010). MERCURY CONCENTRATIONS IN LANDLOCKED ARCTIC CHAR (SALVELINUS ALPINUS) FROM THE CANADIAN ARCTIC. PART II: INFLUENCE OF LAKE BIOTIC AND ABIOTIC CHARACTERISTICS ON GEOGRAPHIC TRENDS IN 27 POPULATIONS. *Environmental Toxicology and Chemistry, 29*(3), 633-643.

56. Gauthier, M., Simard, M., & Blais, B. W. (2010a). Prevalence of Escherichia coli O157:H7 and Salmonella in traditional meats derived from game animals in Nunavik. *Rural Remote Health, 10*(2), 1329.

57. Gauthier, M., Tremblay, M., Bernier, M., & Furgal, C. (2010b). Adaptation of a radar-based river ice mapping technology to the Nunavik context. *Canadian Journal of Remote Sensing, 36*(Suppl. 1), S168 - S185.

58. Gearheard, S., Matumeak, W., Angutikjuaq, I., Maslanik, J., Huntington, H. P., Leavitt, J., et al. (2006). "It's not that simple": A collaborative comparison of sea ice environments, their uses, observed changes, and adaptations in Barrow, Alaska, USA, and Clyde River, Nunavut, Canada. *Ambio, 35*(4), 203-211.

59. Gearheard, S., Pocernich, M., Stewart, R., Sanguya, J., & Huntington, H. P. (2010). Linking Inuit knowledge and meteorological station observations to understand changing wind patterns at Clyde River, Nunavut. *Climatic Change, 100*(2), 267-294.

60. Gombay, N. (2005). The commoditization of country foods in Nunavik: A comparative assessment of its development, applications, and significance. *Arctic, 58*(2), 115-128.

61. Gombay, N. (2006). From subsistence to commercial fishing in Northern Canada – The experience of an Inuk entrepreneur. *British Food Journal, 108*(7), 502-521.

62. Gough, W. A., & Leung, A. (2002). Nature and fate of Hudson Bay permafrost. *Regional Environmental Change, 2*, 177 - 184.

63. Hanesiak, J., Stewart, R., Taylor, P., Moore, K., Barber, D., McBean, G., et al. (2010). STORM STUDIES IN THE ARCTIC (STAR). *Bulletin of the American Meteorological Society, 91*(1), 47-+.

64. Hare, A., Stern, G. A., Macdonald, R. W., Kuzyk, Z. Z., & Wang, F. Y. (2008). Contemporary and preindustrial mass budgets of mercury in the Hudson Bay Marine System: The role of sediment recycling. *Science of the Total Environment, 406*(1-2), 190-204.

65. Henshaw, A. (2006). Pausing along the journey: Learning landscapes, environmental change, and toponymy amongst the Sikusilarmiut. *Arctic Anthropology, 43*(1), 52-66.

66. Higdon, J. W., & Ferguson, S. H. (2009). Loss of Arctic sea ice causing punctuated change in sightings of killer whales (Orcinus orca) over the past century. *Ecological Applications, 19*(5), 1365-1375.

67. Hobson, K. A., Stirling, I., & Andriashek, D. S. (2009). Isotopic homogeneity of breath CO2 from fasting and berry-eating polar bears: implications for tracing reliance on terrestrial foods in a changing Arctic. *Canadian Journal of Zoology-Revue Canadienne De Zoologie, 87*(1), 50-55.

68. Hudson, J. M. G., & Henry, G. H. R. (2009). Increased plant biomass in a High Arctic heath community from 1981 to 2008. *Ecology, 90*(10), 2657-2663.

69. Johnston, D. W., Friedlaender, A. S., Torres, L. G., & Lavigne, D. M. (2005). Variation in sea ice cover on the east coast of Canada from 1969 to 2002: Climate variability and implications for harp and hooded seals. *Climate Research, 29*(3), 209-222.

70. Kraemer, L. D., Berner, J. E., & Furgal, C. M. (2005). The potential impact of climate on human exposure to contaminants in the Arctic. *Int J Circumpolar Health, 64*(5), 498-508.

71. Kuzyk, Z. Z. A., Macdonald, R. W., Johannessen, S. C., & Stern, G. A. (2010). Biogeochemical Controls on PCB Deposition in Hudson Bay. *Environmental Science & Technology, 44*(9), 3280-3285.

72. Laidler, G. J. (2006). Inuit and scientific perspectives on the relationship between sea ice and climate change: The ideal complement? *Climatic Change, 78*(2-4), 407-444.

73. Laidler, G. J., & Elee, P. (2008). Human geographies of sea ice: freeze/thaw processes around Cape Dorset, Nunavut, Canada. *Polar Record, 44*(228), 51-76.

74. Laidler, G. J., Ford, J. D., Gough, W. A., Ikummaq, T., Gagnon, A. S., Kowal, S., et al. (2009). Travelling and hunting in a changing Arctic: assessing Inuit vulnerability to sea ice change in Igloolik, Nunavut. *Climatic Change, 94*(3-4), 363-397.

75. Laidler, G. J., & Gough, W. A. (2003). Climate variability and climatic change: Potential implications for Hudson Bay coastal communities. *Polar Geography, 27*(1), 38-58.

76. Laidre, K. L., & Heide-Jorgensen, M. P. (2005). Arctic sea ice trends and narwhal vulnerability. *Biological Conservation, 121*(4), 509-517.

77. Laidre, K. L., Stirling, I., Lowry, L. F., Wiig, O., Heide-Jorgensen, M. P., & Ferguson, S. H. (2008). Quantifying the sensitivity of arctic marine mammals to climate-induced habitat change. *Ecological Applications, 18*(2), S97-S125.

78. Lambden, J., Receveur, O., & Kuhnlein, H. V. (2007). Traditional food attributes must be included in studies of food security in the Canadian Arctic. *International Journal of Circumpolar Health, 66*(4), 308-319.

79. Leduc, T. B. (2006). Inuit economic adaptations for a changing global climate. *Ecological Economics, 60*(1), 27-35.

80. Lehti, V., Niemela, S., Hoven, C., Mandell, D., & Sourander, A. (2009). Mental health, substance use and suicidal behaviour among young indigenous people in the Arctic: A systematic review. *Social Science & Medicine, 69*(8), 1194-1203.

81. Link, J. S., Bogstad, B., Sparholt, H., & Lilly, G. R. (2009). Trophic role of Atlantic cod in the ecosystem. *Fish and Fisheries, 10*(1), 58-87.

82. Macdonald, R. W., & Loseto, L. L. (2010). Are Arctic Ocean ecosystems exceptionally vulnerable to global emissions of mercury? A call for emphasised research on methylation and the consequences of climate change. *Environmental Chemistry, 7*(2), 133-138.

83. Mahoney, A., Gearheard, S., Oshima, T., & Qillaq, T. (2009). SEA ICE THICKNESS MEASUREMENTS FROM A COMMUNITY-BASED OBSERVING NETWORK. *Bulletin of the American Meteorological Society, 90*(3), 370-+.

84. Mallory, M. L., Gilchrist, H. G., Braune, B. M., & Gaston, A. J. (2006a). Marine birds as indicators of Arctic marine ecosystem health: Linking the Northern Ecosystem Initiative to long-term studies. *Environmental Monitoring and Assessment, 113*(1-3), 31-48.

85. Mallory, M. L., Ogilvie, C., & Gilchrist, H. G. (2006b). A review of the Northern Ecosystem Initiative in Arctic Canada: facilitating arctic ecosystem research through traditional and novel approaches. *Environ Monit Assess, 113*(1-3), 19-29.

86. Martin, D., Belanger, D., Gosselin, P., Brazeau, J., Furgal, C., & Dery, S. (2007). Drinking water and potential threats to human health in nunavik: Adaptation strategies under climate change conditions. *Arctic, 60*(2), 195-202.

87. McKinney, M. A., Peacock, E., & Letcher, R. J. (2009). Sea Ice-associated Diet Change Increases the Levels of Chlorinated and Brominated Contaminants in Polar Bears. *Environmental Science & Technology, 43*(12), 4334-4339.

88. Meier, W. N., Stroeve, J., & Gearheard, S. (2006). Bridging perspectives from remote sensing and Inuit communities on changing sea-ice cover in the Baffin Bay region. *Annals of Glaciology 44*, 433-438.

89. Nadin-Davis, S., Muldoon, F., Whitney, H., & Wandeler, A. I. (2008). Origins of the rabies viruses associated with an outbreak in Newfoundland during 2002-2003. *Journal of Wildlife Diseases, 44*(1), 86-98.

90. Nancarrow, T. L., & Chan, H. M. (2010). Observations of environmental changes and potential dietary impacts in two communities in Nunavut, Canada. *Rural Remote Health, 10*(2), 1370.

91. Newton, J., Paci, C. D., & Ogden, A. (2005). Climate change and natural hazards in Northern Canada: Integrating Indigenous perspectives with government policy. *Mitigation and Adaptation Strategies for Global Change, 10*(3), 541-571.

92. NTK. (2008). A Life Vest for Hudson Bay's Drifting Stewardship. *Arctic, 61*, 35-47.

93. O'Neill, S. J., Osborn, T. J., Hulme, M., Lorenzoni, I., & Watkinson, A. R. (2008). Using expert knowledge to assess uncertainties in future polar bear populations under climate change. *Journal of Applied Ecology, 45*(6), 1649-1659.

94. Overland, J. E., & Wang, M. Y. (2007). Future regional Arctic sea ice declines. *Geophysical Research Letters, 34*(17).

95. Payette, S., Morneau, C., Boudreau, S., & Lamothe, P. (2002). Le caribou migrateur (Rangifer tarandus L.) du Nord quebecois dans l'espace et le temps. *Le Naturaliste Canadien, 126*(2), 24-36.

96. Pearce, T. D., Ford, J. D., Laidler, G. J., Smit, B., Duerden, F., Allarut, M., et al. (2009). Community collaboration and climate change research in the Canadian Arctic. *Polar Research, 28*(1), 10-27.

97. Peloquin, C., & Berkes, F. (2009). Local Knowledge, Subsistence Harvests, and Social- Ecological Complexity in James Bay. *Human Ecology, 37*(5), 533-545.

98. Peters, E. J. (2003). Views of traditional ecological knowledge in co-management bodies in Nunavik, Quebec. *Polar Record, 39*(208), 49-60.

99. Power, M., Dempson, J. B., Power, G., & Reist, J. D. (2000). Environmental influences on an exploited anadromous Arctic charr stock in Labrador. *Journal of Fish Biology, 57*(1), 82-98.

100. Prowse, T. D., Furgal, C., Wrona, F. J., & Reist, J. D. (2009). Implications of Climate Change for Northern Canada: Freshwater, Marine, and Terrestrial Ecosystems. *Ambio, 38*(5), 282-289.

101. Regehr, E. V., Lunn, N. J., Amstrup, S. C., & Stirling, L. (2007). Effects of earlier sea ice breakup on survival and population size of polar bears in western Hudson bay. *Journal of Wildlife Management, 71*(8), 2673-2683.

102. Roberts, E., Nawri, N., & Stewart, R. E. (2008a). On the storms passing over southern Baffin Island during autumn 2005. *Arctic, 61*(3), 309-321.

103. Roberts, E., & Stewart, R. E. (2008b). On the occurrence of freezing rain and ice pellets over the eastern Canadian Arctic. *Atmospheric Research, 89*(1-2), 93-109.

104. Sharma, S., Couturier, S., & Cote, S. D. (2009). Impacts of climate change on the seasonal distribution of migratory caribou. *Global Change Biology, 15*(10), 2549-2562.

105. Smith, S. L., Burgess, M. M., Riseborough, D., & Nixon, F. M. (2005). Recent Trends from Canadian Permafrost Thermal Monitoring Network Sites. *Permafrost and Periglacial Processes, 16*, 19-30.

106. Stewart, E. J., Tivy, A., Howell, S. E. L., Dawson, J., & Draper, D. (2010). Cruise Tourism and Sea Ice in Canada's Hudson Bay Region. *Arctic, 63*(1), 57-66.

107. Stirling, I., Derocher, A. E., Gough, W. A., & Rode, K. (2008). Response to Dyck et al. (2007) on polar bears and climate change in western Hudson Bay. *Ecological Complexity, 5*, 193-201.

108. Stirling, I., & Parkinson, C. L. (2006). Possible effects of climate warming on selected populations of polar bears (Ursus maritimus) in the Canadian Arctic. *Arctic, 59*(3), 261-275.

109. Stirling, I., & Smith, T. G. (2004). Implications of warm temperatures, and an unusual rain event for the survival of ringed seals on the coast of southeastern Baffin Island. *Arctic, 57*(1), 59-67.

110. Tews, J., Fahrig, L., & Ferguson, M. A. D. (2007a). Modeling density dependence and climatic disturbances in caribou: A case study from the Bathurst Island complex, Canadian High Arctic. *Journal of Zoology, 272*(2), 209-217.

111. Tews, J., Ferguson, M. A. D., & Fahrig, L. (2007b). Potential net effects of climate change on High Arctic Peary caribou: Lessons from a spatially explicit simulation model. *Ecological Modelling, 207*(2-4), 85-98.

112. Thiemann, G. W., Derocher, A. E., & Stirling, I. (2008). Polar bear Ursus maritimus conservation in Canada: an ecological basis for identifying designatable units. *Oryx, 42*(4), 504-515.

113. Tremblay, M., Furgal, C., Larrivee, C., Annanack, T., Tookalook, P., Qiisik, M., et al. (2008). Climate Change in Northern Quebec: Adaptation Strategies from Community- Based Research. *Arctic, 61*, 27-34.

114. Wenzel, G. (2009). Canadian Inuit subsistence and ecological instability- if the climate changes, must the Inuit? *Polar Research, 29*, 89-99.

115. Wenzel, G. W. (2004). From TEK to IQ: Inuit Qaujimajatuqangit and Inuit cultural ecology. *Arctic Anthropology, 41*(2), 238-250.

116. White, D., Hinzman, L., Alessa, L., Cassano, J., Chambers, M., Falkner, K., et al. (2007). The arctic freshwater system: Changes and impacts. *Journal of Geophysical Research-Biogeosciences, 112*(G4).

117. Willows, N. D. (2005). Determinants of healthy eating in aboriginal peoples in Canada - The current state of knowledge and research gaps. *Canadian Journal of Public Health-Revue Canadienne De Sante Publique, 96*, S32-S36.

**Table S3: Excluded articles**

1. The role of deep-sea water of the Northern Atlantic in the variations of heat exchange between the ocean and the atmosphere. Vestnik Moskovskogo Universiteta, Seriya, 2002. 5(12): p. 42-48.

2. Oceans advance. International Ocean Systems, 2010. 14(1).

3. Abdalati, W., et al., Elevation changes of ice caps in the Canadian Arctic Archipelago. Journal of Geophysical Research-Earth Surface, 2004. 109(F4).

4. Abnizova, A. and K.L. Young, Sustainability of High Arctic Ponds in a Polar Desert Environment. Arctic, 2010. 63(1): p. 67-84.

5. Abnizova, A.Y.K.L., Hillslope hydrological linkages: Importance to ponds within a polar desert High Arctic wetland. Hydrology Research, 2008. 39(4): p. 309-321.

6. Abraham, K.F., R.L. Jefferies, and R.T. Alisauskas, The dynamics of landscape change and snow geese in mid-continent North America. Global Change Biology, 2005. 11(6): p. 841-855.

7. Achtemichuk, M., et al., Community based physiotherapy services in the Kivalliq Region of Nunavut, Canada. Int J Circumpolar Health, 2004. 63 Suppl 2: p. 98-100.

8. Acua, J.L.D.D.S.P.A.H.E.R.R.B.B.K.B.M.Z.P., Phytoplankton ingestion by appendicularians in the North Water. Deep Sea Research Part II: Topical Studies in Oceanography, 2002. 49(22): p. 5101-5115.

9. Adams, P., Fritz Muüller's legacy on Axel Heiberg Island, Nunavut, Canada. Annals of Glaciology Papers from the International Symposium on the Verification of Cryospheric Models held in Zurich, Switzerland, 1999. 31: p. 1-9.

10. Adrain, J.M. and D.K. Tetreault, The brachymetopid trilobite Radnoria in the Silurian (Wenlock) of New York state and Arctic Canada. Canadian Journal of Earth Sciences, 2005. 42(12): p. 2087-2096.

11. Adrain, J.M.W.S.R., Lower Ordovician trilobites from the Baumann Fiord Formation, Ellesmere Island, Arctic Canada. Canadian Journal of Earth Sciences, 2005. 42(9): p. 1523-1546.

12. Afanasyev, Y.D., N.P. Nezlin, and A.G. Kostianoy, Patterns of seasonal dynamics of remotely sensed chlorophyll and physical environment in the Newfoundland region. Remote Sensing of Environment, 2001. 76(2): p. 268-282.

13. Agnew, T. and S. Howell, The use of operational ice charts for evaluating passive microwave ice concentration data. Atmosphere-Ocean, 2003. 41(4): p. 317-331.

14. Agnew, T., A. Lambe, and D. Long, Estimating sea ice area flux across the Canadian Arctic Archipelago using enhanced AMSR-E. Journal of Geophysical Research-Oceans, 2008. 113(C10).

15. Agnot-Johnston, T. and S. Ringland, Teaching north of the Arctic Circle. J Emerg Nurs, 2008. 34(4): p. 365-8.

16. Akearok, J.A., et al., Inter- and intraclutch variation in egg mercury levels in marine bird species from the Canadian Arctic. Sci Total Environ, 2010. 408(4): p. 836-40.

17. Albert, M.R., et al., Processes and properties of snow-air transfer in the high Arctic with application to interstitial ozone at Alert, Canada. Atmospheric Environment, 2002. 36(15-16): p. 2779-2787.

18. Alexander, B.P.R.J.J.D.J.G.S., Transition metal-catalyzed oxidation of atmospheric sulfur: Global implications for the sulfur budget. Journal of Geophysical Research D: Atmospheres, 2009. 114(2).

19. Alexander, M.A., et al., The atmospheric response to realistic Arctic sea ice anomalies in an AGCM during winter. Journal of Climate, 2004. 17(5): p. 890-905.

20. Alisauskas, R.T., J.W. Charlwood, and D.K. Kellett, Vegetation correlates of the history and density of nesting by Ross's geese and lesser snow geese at Karrak Lake, Nunavut. Arctic, 2006. 59(2): p. 201-210.

21. Alisauskas, R.T., et al., Neckbands, harvest, and survival of Ross's geese from Canada's Central Arctic. Journal of Wildlife Management, 2006. 70(1): p. 89-100.

22. Alkire, M.B. and J.H. Trefry, Transport of spring floodwater from rivers under ice to the Alaskan Beaufort Sea. Journal of Geophysical Research-Oceans, 2006. 111(C12).

23. Alkire, M.B.F.K.K.R.I.S.M.M.J., The return of Pacific waters to the upper layers of the central Arctic Ocean. Deep Sea Research Part I: Oceanographic Research Papers, 2007. 54(9): p. 1509-1529.

24. Allard, K.A., et al., Adult survival of herring gulls breeding in the Canadian Arctic. Waterbirds, 2006. 29(2): p. 163-168.

25. Allard, K.A., et al., Apparent survival of adult Thayer's and Glaucous Gulls nesting sympatrically in the Canadian high Arctic. Ardea, 2010. 98(1): p. 43-50.

26. Allard, K.A.M.M.L.F.M.R.W.K.L., Prebasic molt initiation and progress in northern fulmars of the High Arctic: Do molt and breeding overlap? Polar Biology, 2008. 31(2): p. 181-188.

27. Allen, J., et al., Suicide prevention as a community development process: understanding circumpolar youth suicide prevention through community level outcomes. Int J Circumpolar Health, 2009. 68(3): p. 274-91.

28. Allen, N.N.M.K.S.M.T.B.J., Arbuscular mycorrhizae on Axel Heiberg Island (80&#x00B0;N) and at Saskatoon (52&#x00B0;N) Canada. Canadian Journal of Botany, 2006. 84(7): p. 1094-1100.

29. Al-Reasi, H.A., F.A. Ababneh, and D.R. Lean, Evaluating mercury biomagnification in fish from a tropical marine environment using stable isotopes (delta13C and delta15N). Environ Toxicol Chem, 2007. 26(8): p. 1572-81.

30. Alt, B.T.L.C.L.A.D.E.H.A.N.W.P.M., Automatic weather station results from Forsheim Peninsula, Ellesmere Island, Nunavut. Bulletin of the Geological Survey of Canada Environmental response to Climatic change in the Canadian High Arctic n529, 2000. 12(01): p. 37-71.

31. Alt, B.W.K.C.T., A case study of old-ice import and export through Peary and Sverdrup Channels in the Canadian Arctic Archipelago: 1998-2005. Annals of Glaciology, 2006. 44: p. 329-338.

32. Ambrose, W.G., et al., The sub-ice algal community in the Chukchi sea: large- and small-scale patterns of abundance based on images from a remotely operated vehicle. Polar Biology, 2005. 28(10): p. 784-795.

33. Amiel, D.C.J.K.H.D.J., 234Th/238U disequilibrium as an indicator of the seasonal export flux of particulate organic carbon in the North Water. Deep Sea Research Part II: Topical Studies in Oceanography, 2002. 49(22): p. 5191-5209.

34. Amstrup, S.C., et al., Allocating harvests among polar bear stocks in the Beaufort Sea. Arctic, 2005. 58(3): p. 247-259.

35. Anaka, A.S.S.D.W.M., Biogeochemical toxicity and phytotoxicity of nitrogenous compounds in a variety of arctic soils. Environmental Toxicology and Chemistry, 2008. 27(8): p. 1809-1816.

36. Anastasio, C. and A.L. Jordan, Photoformation of hydroxyl radical and hydrogen peroxide in aerosol particles from Alert, Nunavut: implications for aerosol and snowpack chemistry in the Arctic. Atmospheric Environment, 2004. 38(8): p. 1153-1166.

37. Andersen, J.M.W.Y.F.S.G.H.M.O.R.-A.A., Movement patterns of hooded seals (Cystophora cristata) in the Northwest Atlantic Ocean during the post-moult and pre-breed seasons. NAFO Scientific Council Studies n42, 2009. 10(21): p. 1-11.

38. Andersen, L.W.B.E.W.D.D.W.G.I.W.O.W.R.S., Genetic signals of historic and recent migration between sub-populations of Atlantic walrus Odobenus rosmarus rosmarus west and east of Greenland. Endangered Species Research, 2009. 9(3): p. 197-211.

39. Andersen, S., et al., Feasibility of Dual-Energy X-ray Absorptiometry in Arctic field studies. Int J Circumpolar Health, 2004. 63 Suppl 2: p. 280-3.

40. Andersen, S., E. Boeskov, and P. Laurberg, Ethnic diffferences in bone mineral density between Inuit and Caucasians in North Greenland are caused by differences in body size. Journal of Clinical Densitometry, 2005. 8(4): p. 409-414.

41. Andersen, S., et al., Changes in iodine excretion in 50-69-y-old denizens of an Arctic society in transition and iodine excretion as a biomarker of the frequency of consumption of traditional Inuit foods. American Journal of Clinical Nutrition, 2005. 81(3): p. 656-663.

42. Andersen, T., J. Kruse, and B. Poppel, Survey of living conditions in the Arctic: Inuit, Saami and the indigenous peoples of Chukotka (SLICA). Arctic, 2002. 55(3): p. 310-315.

43. Anderson, J.T., E.L. Dalley, and R.L. O'Driscoll, Juvenile capelin (Mallotus villosus) off Newfoundland and Labrador in the 1990s. Ices Journal of Marine Science, 2002. 59(5): p. 917-928.

44. Anderson, M.R. and R.B. Rivkin, Seasonal patterns in grazing mortality of bacterioplankton in polar oceans: a bipolar comparison. Aquatic Microbial Ecology, 2001. 25(2): p. 195-206.

45. Anderson, N.J.L.M.J., Increased aridity during the early Holocene in West Greenland inferred from stable isotopes in laminated-lake sediments. Quaternary Science Reviews, 2004. 23(7-8): p. 841-849.

46. Anderson, R.K., et al., A millennial perspective on Arctic warming from C-14 in quartz and plants emerging from beneath ice caps. Geophysical Research Letters, 2008. 35(1).

47. Andre, M.F., The geomorphic impact of glaciers as indicated by tors in North Sweden (Aurivaara, 68 degrees N). Geomorphology, 2004. 57(3-4): p. 403-421.

48. Andrews, J.T., Explained and unexplained spatial and temporal variability in rates of marine sediment accumulation along the northeast margin of the Laurentide Ice Sheet <= 14 Ka. Journal of Sedimentary Research, 2000. 70(4): p. 782-787.

49. Andrews, J.T. and J. Giraudeau, Multi-proxy records showing significant Holocene environmental variability: the inner N. Iceland shelf (Hunafloi). Quaternary Science Reviews, 2003. 22(2-4): p. 175-193.

50. Andrews, J.T.J.A.E.M.B., Late Quarternary stratigraphy of Hudson and Resolution basins, east of Hudson Strait. Bulletin of the Geological Survey of Canada Marine Geology of Hudson Strait and Ungava Bay, Eastern Arctic Canada: Late Quarternary Sediments, Depositional Environments, and Late Glacia Deglacial History Derived from Marine Terrestrial Studies n566, 2001. 05(01): p. 57-64.

51. Andrews, J.T.K.G.B.E.D.D., An exploratory method to detect tephras from quantitative XRD scans: Examples from Iceland and east Greenland marine sediments. Holocene, 2006. 16(8): p. 1035-1042.

52. Andrews, J.T.P.S.M., Grain-size characteristics and provenance of ice-proximal glacial marine sediments. Geological Society Special Publication Glacier Influenced Sedimentation on High Latitude Continental Margins n203, 2002. 12(01): p. 305-324.

53. Antoniades, D., et al., Abrupt environmental change in Canada's northernmost lake inferred from fossil diatom and pigment stratigraphy. Geophysical Research Letters, 2007. 34(18).

54. Antoniades, D. and M.S.V. Douglas, Characterization of high arctic stream diatom assemblages from Cornwallis Island, Nunavut, Canada. Canadian Journal of Botany-Revue Canadienne De Botanique, 2002. 80(1): p. 50-58.

55. Antoniades, D., M.S.V. Douglas, and J.P. Smol, The physical and chemical limnology of 24 ponds and one lake from Isachsen, Ellef Ringnes Island, Canadian High Arctic. International Review of Hydrobiology, 2003. 88(5): p. 519-538.

56. Antoniades, D., M.S.V. Douglas, and J.P. Smol, Diatom species-environment relationships and inference models from Isachsen, Ellef Ringnes Island, Canadian High Arctic. Hydrobiologia, 2004. 529(1): p. 1-18.

57. Antoniades, D., M.S.V. Douglas, and J.P. Smol, Quantitative estimates of recent environmental changes in the Canadian High Arctic inferred from diatoms in lake and pond sediments. Journal of Paleolimnology, 2005. 33(3): p. 349-360.

58. Antoniades, D., M.S.V. Douglas, and J.P. Smol, Biogeographic distributions and environmental controls of stream diatoms in the Canadian Arctic Archipelago. Botany-Botanique, 2009. 87(5): p. 443-454.

59. Antoniades, D., et al., Seven new species of freshwater diatoms (Bacillariophyceae) from the Canadian Arctic Archipelago. Nova Hedwigia, 2009. 88(1-2): p. 57-80.

60. Antoniades, D.D.M.S.V.S.J.R., Comparative physical and chemical limnology of two Canadian High Arctic regions: Alert (Ellesmere Island, NU) and Mould Bay (Prince Patrick Island, NWT). Archiv Fur Hydrobiologie, 2003. 158(4): p. 485-516.

61. Antoniades, D.D.M.S.V.S.J.P., Benthic diatom autecology and inference model development from the Canadian High Arctic Archipelago. Journal of Phycology, 2005. 41(1): p. 30-45.

62. Antoniades, D.V.J.M.M.J.P.R.V.W.F.B.C.T.J.L.S., Bacterial dominance of phototrophic communities in a High Arctic lake and its implications for paleoclimate analysis. Polar Science, 2009. 3(3): p. 147-161.

63. Arbour, L., et al., Spina bifida, folate metabolism, and dietary folate intake in a Northern Canadian aboriginal population. Int J Circumpolar Health, 2002. 61(4): p. 341-51.

64. Arbour, L., et al., Heart defects and other malformations in the Inuit in Canada: a baseline study. Int J Circumpolar Health, 2004. 63(3): p. 251-66.

65. Arbour, L., et al., Congenital heart defects in Canadian Inuit: is more folic acid making a difference? Alaska Med, 2007. 49(2 Suppl): p. 163-6.

66. Armstrong, S.A., et al., Aryl hydrocarbon bioaccessibility to small mammals from Arctic plants using in vitro techniques. Environmental Toxicology and Chemistry, 2007. 26(3): p. 491-496.

67. Arndt, C.E. and K.M. Swadling, Crustacea in Arctic and Antarctic sea ice: Distribution, diet and life history strategies, in Advances in Marine Biology, Vol 51. 2006. p. 197-315.

68. Artamonov Yu, V.B.M.V.B.A.E.S.E.A., Regional features of the seasonal variability of linear trends of the temperature fields in the Atlantic Ocean and their relation to the large-scale circulation of waters. Physical Oceanography, 2008. 18(4): p. 194-203.

69. Ashworth, A.C., The ecology of Helophorlis arcticus Brown (Coleoptera : Hydrophilidae) reconsidered. Coleopterists Bulletin, 2000. 54(3): p. 370-378.

70. Assani, A.A.L.F.V.M.E.B.S.B.C., Modes de variabilité temporelle des débits moyens annuels et leurs liens avec les indices climatiques au Québec (Canada) Translated Title: Temporal variability modes of annual average discharges and their links to the climate indices in Québec (Canada). Geographie Physique Et Quaternaire, 2006. 60(3): p. 215-224.

71. Atkinson, D.E., Modelling July mean temperatures on Fosheim Peninsula, Ellesmere Island, Nunavut. Bulletin of the Geological Survey of Canada Environmental response to Climatic change in the Canadian High Arctic n529, 2000. 12(01): p. 99-111.

72. Atkinson, M.M.M.E., Local protest and resistance to the rupert diversion project, northern quebec. Arctic, 2009. 62(4): p. 468-480.

73. Atkinson, N., Late Wisconsinan glaciation of Amund and Ellef Ringnes islands, Nunavut: evidence for the configuration, dynamics, and deglacial chronology of the northwest sector of the Innuitian Ice Sheet. Canadian Journal of Earth Sciences, 2003. 40(3): p. 351-363.

74. Atkinson, N., A statistical technique for determining the source area of glacially transported granite erratics in the Queen Elizabeth Islands, Nunavut. Canadian Journal of Earth Sciences, 2007. 44(1): p. 43-59.

75. Atkinson, N., A 10400-Year-Old Bowhead Whale (Balaena mysticetus) Skull from Ellef Ringnes Island, Nunavut: Implications for Sea-Ice Conditions in High Arctic Canada at the End of the Last Glaciation. Arctic, 2009. 62(1): p. 38-44.

76. Atkinson, N. and J. England, Postglacial emergence of Amund and Ellef Ringnes islands, Nunavut: Implications for the northwest sector of the Innuitian Ice Sheet. Canadian Journal of Earth Sciences, 2004. 41(3): p. 271-283.

77. Audet, B., G. Gauthier, and E. Levesque, Feeding ecology of greater snow goose goslings in mesic tundra on Bylot Island, Nunavut, Canada. Condor, 2007. 109(2): p. 361-376.

78. Avallone, L.M., et al., In situ measurements of bromine oxide at two high-latitude boundary layer sites: Implications of variability. Journal of Geophysical Research-Atmospheres, 2003. 108(D3).

79. Axford, Y., et al., Recent changes in a remote Arctic lake are unique within the past 200,000 years. Proceedings of the National Academy of Sciences of the United States of America, 2009. 106(44): p. 18443-18446.

80. Axford, Y., et al., Paleoecological evidence for abrupt cold reversals during peak Holocene warmth on Baffin Island, Arctic Canada. Quaternary Research, 2009. 71(2): p. 142-149.

81. Ayles, G.B.S.N.B., Canadian Beaufort Sea 2000: The environmental and social setting. Arctic, 2002. 55: p. 4-17.

82. Ayukawa, H., et al., Otitis media and hearing loss among 12-16-year-old Inuit of Inukjuak, Quebec, Canada. International Journal of Circumpolar Health, 2004. 63(SUPPL. 2): p. 312-314.

83. Ayukawa, H., P. Lejeune, and J.F. Proulx, Hearing screening outcomes in Inuit children in Nunavik, Quebec, Canada. International Journal of Circumpolar Health, 2004. 63(SUPPL. 2 ): p. 309-311.

84. Babaluk, J.A., et al., Summer movements of radio-tagged arctic charr (Salvelinus alpinus) in Lake Hazen, Nunavut, Canada. Arctic, 2001. 54(4): p. 418-424.

85. Backer, V., et al., Respiratory symptoms in greenlanders living in Greenland and Denmark: a population-based study. Ann Allergy Asthma Immunol, 2004. 93(1): p. 76-82.

86. Bacle, J.C.E.C.I.R.G., Water column structure and circulation under the North Water during spring transition: April-July 1998. Deep Sea Research Part II: Topical Studies in Oceanography, 2002. 49(22): p. 4907-4925.

87. Badzinski, S.S., et al., Composition of eggs and neonates of Canada Geese and Lesser Snow Geese. Auk, 2001. 118(3): p. 687-697.

88. Bailey, D.A., P.B. Rhines, and S. Hakkinen, Formation and pathways of north atlantic deep water in a coupled ice-ocean model of the arctic-north atlantic oceans. Climate Dynamics, 2005. 25(5): p. 497-516.

89. Baird, R.W., Status of Killer Whales, Orcinus orca, in Canada. Canadian Field-Naturalist, 2001. 115(4): p. 676-701.

90. Bakalian, F.M.H.S.P.R., Influence of the Icelandic Low latitude on the frequency of Greenland tip jet events: Implications for Irminger Sea convection. Journal of Geophysical Research C: Oceans, 2007. 112(4).

91. Baker, A.C.G.A.R., Pedagogy of the front float: Dialogue and aquatics programming in Taloyoak, Nunavut. Arctic, 2008. 61(3): p. 233-242.

92. Bakken, V.M.F., Wintering areas and recovery rates of Brünnich's guillemots Uria lomvia ringed in the Svalbard Archipelago. Arctic, 2005. 58(3): p. 268-275.

93. Ballantyne, A.P.B.P.A.R.N.H.C.R.W.D., Pliocene Arctic temperature constraints from the growth rings and isotopic composition of fossil larch. Palaeogeography, Palaeoclimatology, Palaeoecology, 2006. 242(3): p. 188-200.

94. Bamsey, M., et al., Four-month Moon and Mars crew water utilization study conducted at the Flashline Mars Arctic Research Station, Devon Island, Nunavut. Advances in Space Research, 2009. 43(8): p. 1256-1274.

95. Banerji, A., High rates of hospitalisation for bronchiolitis in Inuit children on Baffin Island. Int J Circumpolar Health, 2001. 60(3): p. 375-9.

96. Banerji, A., et al., Risk Factors and Viruses Associated With Hospitalization Due to Lower Respiratory Tract Infections in Canadian Inuit Children A Case-Control Study. Pediatric Infectious Disease Journal, 2009. 28(8): p. 697-701.

97. Banerji, A., et al., Comparison of the Cost of Hospitalization for Respiratory Syncytial Virus Disease Versus Palivizumab Prophylaxis in Canadian Inuit Infants. Pediatric Infectious Disease Journal, 2009. 28(8): p. 702-706.

98. Barber, D.G.I.J.W.A.E., Estimation of snow water equivalent using microwave radiometry over Arctic first-year sea ice. Hydrological Processes, 2003. 17(17): p. 3503-3517.

99. Barker, J.D.S.M.J.F.S.J.T.R.J., Abundance and dynamics of dissolved organic carbon in glacier systems. Arctic, Antarctic, and Alpine Research, 2006. 38(2): p. 163-172.

100. Barot, S.H.M.D.U.M.M.J., Maturation of Newfoundland American plaice (Hippoglossoides platessoides): Long-term trends in maturation reaction norms despite low fishing mortality? Ices Journal of Marine Science, 2005. 62(1): p. 56-64.

101. Barr, W., Harpoon guns, the lost Greenland settlement, and penal colonies: George Manby's arctic obsessions. Polar Record, 2001. 37(203): p. 291-314.

102. Barrett, J.H.L.A.M.R.C.M., The origins of intensive marine fishing in medieval Europe: The English evidence. Proceedings of the Royal Society Biological Sciences, 1556. 271(1556): p. 2417-2421.

103. Barrett, R.T.C.G.A.-N.T.M.A.M.W.A.R.J.B.V.R.R., Seabird numbers and prey consumption in the North Atlantic. Ices Journal of Marine Science, 2006. 63(6): p. 1145-1158.

104. Barron, M.G. and L. Ka'aihue, Potential for photoenhanced toxicity of spilled oil in Prince William Sound and Gulf of Alaska waters. Mar Pollut Bull, 2001. 43(1-6): p. 86-92.

105. Barron, M.G., et al., Temporal and spatial variation in solar radiation and photoenhanced toxicity risks of spilled oil in Prince William Sound, Alaska, USA. Environ Toxicol Chem, 2008. 27(3): p. 727-36.

106. Bartlett, J.B.J.C.J.H.B.S.B.S.B.R., ArcticNet: The current and future vision of its seabed mapping programme. Hydrographic Journal n122, 2006. 10(01): p. 11-16.

107. Batchelor, R.L., et al., Four Fourier transform spectrometers and the Arctic polar vortex: instrument intercomparison and ACE-FTS validation at Eureka during the IPY springs of 2007 and 2008. Atmospheric Measurement Techniques, 2010. 3(1): p. 51-66.

108. Batchelor, R.L., et al., A New Bruker IFS 125HR FTIR Spectrometer for the Polar Environment Atmospheric Research Laboratory at Eureka, Nunavut, Canada: Measurements and Comparison with the Existing Bomem DA8 Spectrometer. Journal of Atmospheric and Oceanic Technology, 2009. 26(7): p. 1328-1340.

109. Baud, A.N.H.A.B.B.B.T.W.H.C.M.E.A.F., Lower Triassic bryozoan beds from Ellesmere Island, High Arctic, Canada. Polar Research Special issue: the Boreal Triassic, 2008. 27(3): p. 428-440.

110. Beauchamp, B.H.C.M.B.T.W.G.S.E.U.J.G.L.T.J.N.P., Late Permian sedimentation in the Sverdrup Basin, Canadian Arctic: The Lindström and Black Stripe Formations. Bulletin of Canadian Petroleum Geology, 2009. 57(2): p. 167-191.

111. Bebak, J., J.A. Hankins, and S.T. Summerfelt, Effect of water temperature on survival of eyed eggs and alevins of Arctic char. North American Journal of Aquaculture, 2000. 62(2): p. 139-143.

112. Bebak-Williams, J. and G.L. Bullock, Vaccination against furunculosis in arctic char: Efficacy of a commercial vaccine. Journal of Aquatic Animal Health, 2002. 14(4): p. 294-297.

113. Bechet, A.M.J.L.M.P.R.C., A second breeding site for Ross's gull (Rhodostethia rosea) in Nunavut, Canada. Arctic, 2000. 53(3): p. 234-236.

114. Becker, P.R.K.M.M.M.E.A.D.R.S.M.M.E.M.S.D.M.K.P.B.J.M., Concentrations of polychlorinated biphenyls (PCB's), chlorinated pesticides, and heavy metals and other elements in tissues of belugas, Delphinapterus leucas, from Cook Inlet, Alaska. Marine Fisheries Review, 2000. 62(3): p. 81-98.

115. Becker, S., et al., Long-term trends in atmospheric concentrations of alpha- and gamma-HCH in the Arctic provide insight into the effects of legislation and climatic fluctuations on contaminant levels. Atmospheric Environment, 2008. 42(35): p. 8225-8233.

116. Beine, H.J., et al., Fluxes of nitrates between snow surfaces and the atmosphere in the European high Arctic. Atmospheric Chemistry and Physics, 2003. 3: p. 335-346.

117. Beine, H.J., et al., NOx during background and ozone depletion periods at Alert: Fluxes above the snow surface. Journal of Geophysical Research-Atmospheres, 2002. 107(D21).

118. Belkin, I.M.C.P.C.S.K., Fronts in Large Marine Ecosystems. Progress in Oceanography Comparative Marine Ecosystem Structure and Function: Descriptors and Cgaracteristics, 2009. 81(1): p. 223-236.

119. Bell, C.M.D.B.D.S.M.D.M.C.F.B.R.W.J., Spatial and temporal variability in the snowpack of a High Arctic ice cap: Implications for mass-change measurements. Annals of Glaciology, 2008. 48: p. 159-170.

120. Bellingham, P.J., The humanitarian service of dentists in Grenfell's sub-Arctic Labrador: 1910-1930. J Hist Dent, 2006. 54(3): p. 101-7.

121. Belzile, C., et al., Ultraviolet attenuation by dissolved and particulate constituents of first-year ice during late spring in an Arctic polynya. Limnology and Oceanography, 2000. 45(6): p. 1265-1273.

122. Benedict, J.B., Tundra game drives: an Arctic-Alpine comparison. Arctic Antarctic and Alpine Research, 2005. 37(4): p. 425-434.

123. Benner, R., P. Louchouarn, and R.M.W. Amon, Terrigenous dissolved organic matter in the Arctic Ocean and its transport to surface and deep waters of the North Atlantic. Global Biogeochemical Cycles, 2005. 19(2).

124. Bensing, J.P.J.N.P.B.B., Carbonate deposition during a time of mid-latitude ocean cooling: Early Permian subtropical sedimentation in the Sverdrup Basin, Arctic Canada. Journal of Sedimentary Research, 2008. 78(1): p. 2-15.

125. Bent, A.L., The 1933 Ms = 7.3 Baffin Bay earthquake: Strike-slip faulting along the northeastern Canadian passive margin. Geophysical Journal International, 2002. 150(3): p. 724-736.

126. Bentley, M.J., et al., Geomorphological evidence and cosmogenic Be-10/Al-26 exposure ages for the Last Glacial Maximum and deglaciation of the Antarctic Peninsula Ice Sheet. Geological Society of America Bulletin, 2006. 118(9-10): p. 1149-1159.

127. Berge, J., Le Nunavut et l'espace-monde, contacts culturels et genése d'une urbanité Translated Title: Nunavut and world-space, cultural contacts and the birth of urbanity. Geographie et Cultures n48, 2003. 12(01): p. 101-120.

128. Berkes, F. and M.K. Berkes, Ecological complexity, fuzzy logic, and holism in indigenous knowledge. Futures, 2009. 41(1): p. 6-12.

129. Berkes, F. and D. Jolly, Adapting to climate change: Social-ecological resilience in a Canadian Western Arctic community. Conservation Ecology, 2002. 5(2).

130. Berner, J.E. and A. Gilman, Arctic health policy: contribution of scientific data. International Journal of Hygiene and Environmental Health, 2003. 206(4-5): p. 351-362.

131. Berreville, O.F., et al., Exploratory data analysis of the interactions among physics, food web structure, and function in two Arctic polynyas. Canadian Journal of Fisheries and Aquatic Sciences, 2008. 65(6): p. 1036-1046.

132. Berti, P.R., R. Soueida, and H.V. Kuhnlein, DIETARY ASSESSMENT OF INDIGENOUS CANADIAN ARCTIC WOMEN WITH A FOCUS ON PREGNANCY AND LACTATION. International Journal of Circumpolar Health, 2008. 67(4): p. 349-362.

133. Besonen, M.R., et al., A record of climate over the last millennium based on varved lake sediments from the Canadian High Arctic. Holocene, 2008. 18(1): p. 169-180.

134. Betts, M.W., Seven focal economies for six focal places: The development of economic diversity in the western Canadian Arctic. Arctic Anthropology, 2005. 42(1): p. 47-87.

135. Betts, M.W., The Mackenzie Inuit whale bone industry: Raw material, tool manufacture, scheduling, and trade. Arctic, 2007. 60(2): p. 129-144.

136. Betts, M.W. and T.M. Friesen, Quantifying hunter-gatherer intensification: a zooarchaeological case study from Arctic Canada. Journal of Anthropological Archaeology, 2004. 23(4): p. 357-384.

137. Betts, M.W. and T.M. Friesen, Declining foraging returns from an inexhaustible resource? Abundance indices and beluga whaling in the western Canadian Arctic. Journal of Anthropological Archaeology, 2006. 25(1): p. 59-81.

138. Bhatia, M., M. Sharp, and J. Foght, Distinct bacterial communities exist beneath a high arctic polythermal glacier. Applied and Environmental Microbiology, 2006. 72(9): p. 5838-5845.

139. Bhattacharya, Y. and A.J. Gerrard, Correlations of mesospheric winds with subtle motion of the Arctic polar vortex. Atmospheric Chemistry and Physics, 2010. 10(2): p. 431-436.

140. Bhattacharya, Y., G.G. Shepherd, and S. Brown, Variability of atmospheric winds and waves in the Arctic polar mesosphere during a stratospheric sudden warming. Geophysical Research Letters, 2004. 31(23).

141. Bhattacharya, Y.G.A.J., Correlations of mesospheric winds with subtle motion of the arctic polar vortex. Atmospheric Chemistry and Physics Discussions, 2009. 9(4): p. 16549-16562.

142. Biastoch, A., C.W. Boning, and J.R.E. Lutjeharms, Agulhas leakage dynamics affects decadal variability in Atlantic overturning circulation. Nature, 2008. 456(7221): p. 489-492.

143. Bigelow, N.H., et al., Climate change and Arctic ecosystems: 1. Vegetation changes north of 55 degrees N between the last glacial maximum, mid-Holocene, and present. Journal of Geophysical Research-Atmospheres, 2003. 108(D19).

144. Bigg, G.R. and M.R. Wadley, The origin and flux of icebergs released into the Last Glacial Maximum Northern Hemisphere oceans: the impact of ice-sheet topography. Journal of Quaternary Science, 2001. 16(6): p. 565-573.

145. Bigg, G.R. and M.R. Wadley, Simulation of "great salinity anomalies'' in coupled climate models. Journal of Geophysical Research-Oceans, 2007. 112(C3).

146. Billson, J.M., Inuit dreams, inuit realities: Shattering the bonds of dependency. American Review of Canadian Studies Aboriginal Peoples, 2001. 31(1): p. 283-299.

147. Bin Muzaffar, S., HELMINTHS OF MURRES (ALCIDAE: URIA SPP.): MARKERS OF ECOLOGICAL CHANGE IN THE MARINE ENVIRONMENT. Journal of Wildlife Diseases, 2009. 45(3): p. 672-683.

148. Bindler, R., et al., Pb isotope ratios of lake sediments in West Greenland: inferences on pollution sources. Atmospheric Environment, 2001. 35(27): p. 4675-4685.

149. Bingham, R.G.H.A.L.N.P.W.S.M.J., An investigation into the mechanisms controlling seasonal speedup events at a High Arctic glacier. Journal of Geophysical Research F: Earth Surface, 2008. 113(2).

150. Bingham, R.G.N.P.W.S.M.J., Intra-annual and intra-seasonal flow dynamics of a High Arctic polythermal valley glacier. Annals of Glaciology Papers from the International Symposium on Physical and Mechanical Processes in Ice in relation to Glacier and Ice Sheet Modelling, held in Chamonix, France, 2002. 37: p. 181-188.

151. Bingham, R.G.N.P.W.S.M.J.B.S., Subglacial drainage processes at a High Arctic polythermal valley glacier. Journal of Glaciology, 2005. 51(172): p. 15-24.

152. Bird, B.W., et al., A 2000 year varve-based climate record from the central Brooks Range, Alaska. Journal of Paleolimnology, 2009. 41(1): p. 25-41.

153. Bishop, S.L., et al., FMARS 2007: Stress and coping in an arctic Mars simulation. Acta Astronautica, 2010. 66(9-10): p. 1353-1367.

154. Bjerregaard, P., Rapid socio-cultural change and health in the Arctic. Int J Circumpolar Health, 2001. 60(2): p. 102-11.

155. Bjerregaard, P., Population studies, genetics and sifting reality from myth. Int J Circumpolar Health, 2005. 64(3): p. 202-3.

156. Bjerregaard, P., et al., Exposure of inuit in Greenland to organochlorines through the marine diet. Journal of Toxicology and Environmental Health-Part A, 2001. 62(2): p. 69-81.

157. Bjerregaard, P., et al., Blood pressure among the Inuit (Eskimo) populations in the Arctic. Scandinavian Journal of Public Health, 2003. 31(2): p. 92-99.

158. Bjerregaard, P. and J.C. Hansen, Organochlorines and heavy metals in pregnant women from the Disko Bay area in Greenland. Science of the Total Environment, 2000. 245(1-3): p. 195-202.

159. Bjerregaard, P., G. Mulvad, and J. Olsen, Studying health in Greenland: obligations and challenges. Int J Circumpolar Health, 2003. 62(1): p. 5-16.

160. Bjorklund, K.R.D.J.K.D.P.S.N.R., Joergensenium rotatile n. gen., n. sp. (Entactinaria, Radiolaria): Its distribution in west Norwegian fjords. Micropaleontology, 2007. 53(6): p. 457-468.

161. Bjornsson, H., et al., Polynyas in a high-resolution dynamic-thermodynamic sea ice model and their parameterization using flux models. Tellus Series a-Dynamic Meteorology and Oceanography, 2001. 53(2): p. 245-265.

162. Blachowiak-Samolyk, K., et al., Arctic zooplankton do not perform diel vertical migration (DVM) during periods of midnight sun. Marine Ecology-Progress Series, 2006. 308: p. 101-116.

163. Blake Jr, W., Holocene carbonate precipitates on Precambrian bedrock in the High Arctic: Age and potential for palaeoclimatic information. Geografiska Annaler, Series A: Physical Geography Climate Change and Variability, 2005. 87(1): p. 175-192.

164. Boertmann, D., et al., The significance of Southwest Greenland as winter quarters for seabirds. Bird Conservation International, 2004. 14(2): p. 87-112.

165. Boessenkool, K.P.H.I.R.E.H.Y.I., North Atlantic climate and deep-ocean flow speed changes during the last 230 years. Geophysical Research Letters, 2007. 34(13).

166. Bojesen-Koefoed, J.A.N.H.P.C.F.G., Age of oils in West Greenland: Was there a Mesozoic seaway between Greenland and Canada? Geological Survey of Denmark and Greenland Bulletin n4, 2004. 10(18): p. 49-52.

167. Boles, M., et al., Effectiveness of a tobacco quitline in an indigenous population: a comparison between Alaska Native people and other first-time quitline callers who set a quit date. Int J Circumpolar Health, 2009. 68(2): p. 170-81.

168. Bolter, M., Microbiological communities and properties of Arctic soils: Results of the Tundra Northwest Expedition 1999 (Nunavut and Northwest Territories, Canada). Polarforschung, 2003. 73(2): p. 103-110.

169. Bolter, M.B.H.P.W.H., Properties, formation, classification and ecology of Arctic soils: Results from the Tundra Northwest Expedition 1999 (Nunavut and Northwest Territories, Canada). Polarforschung, 2003. 73(2): p. 89-101.

170. Bond, A.L. and A.W. Diamond, Mercury concentrations in seabird tissues from Machias Seal Island, New Brunswick, Canada. Sci Total Environ, 2009. 407(14): p. 4340-7.

171. Bonefeld-Jorgensen, E.C., Biomonitoring in Greenland: human biomarkers of exposure and effects - a short review. Rural Remote Health, 2010. 10(2): p. 1362.

172. Bonefeld-Jorgensen, E.C. and M. Long, Dioxin-like activity in the blood of Greenlandic Inuit and Danish women: a pilot study. Int J Circumpolar Health, 2010. 69(2): p. 181-94.

173. Bonsal, B.R. and T.D. Prowse, Regional assessment of GCM-simulated current climate over northern Canada. Arctic, 2006. 59(2): p. 115-128.

174. Boon, S., et al., Forty-seven Years of Research on the Devon Island Ice Cap, Arctic Canada. Arctic, 2010. 63(1): p. 13-29.

175. Boon, S.S.M., The role of hydrologically-driven ice fracture in drainage system evolution on an Arctic glacier. Geophysical Research Letters, 2003. 30(18): p. 1-1.

176. Booth, B.C.L.P.B.S.K.B.M.Z.P.A.D., Dynamics of Chaetoceros socialis blooms in the North Water. Deep Sea Research Part II: Topical Studies in Oceanography, 2002. 49(22): p. 5003-5025.

177. Borga, K., et al., Regional and species specific bioaccumulation of major and trace elements in Arctic seabirds. Environmental Toxicology and Chemistry, 2006. 25(11): p. 2927-2936.

178. Borga, K., et al., Why do organochlorine differences between arctic regions vary among trophic levels? Environmental Science & Technology, 2005. 39(12): p. 4343-4352.

179. Born, E.W., Reproduction in male Atlantic walruses (Odobenus rosmarus rosmarus) from the North Water (N Baffin Bay). Marine Mammal Science, 2003. 19(4): p. 819-831.

180. Born, E.W.T.J.A.M.R.F.F., Habitat use of ringed seals (Phoca hispida) in the North Water area (North Baffin Bay). Arctic, 2004. 57(2): p. 129-142.

181. Borrell, A.A.A.C.G.L.C.H.-J.M.P.J.J., Organochlorine residues in harbour porpoises from Southwest Greenland. Environmental Pollution, 2004. 128(3): p. 381-391.

182. Boss, E.T.L.B.P.S.D.R.S.Z.R.P.M.J.S.P.G., Observations of pigment and particle distributions in the western North Atlantic from an autonomous float and ocean color satellite. Limnology and Oceanography, 2008. 53(5): p. 2112-2122.

183. Bottenheim, J.W., et al., Alkenes in the Arctic boundary layer at Alert, Nunavut, Canada. Atmospheric Environment, 2002. 36(15-16): p. 2585-2594.

184. Bottenheim, J.W., et al., Ozone in the Arctic lower troposphere during winter and spring 2000 (ALERT2000). Atmospheric Environment, 2002. 36(15-16): p. 2535-2544.

185. Bottenheim, J.W.C.E., A trajectory study into the origin of spring time Arctic boundary layer ozone depletion. Journal of Geophysical Research D: Atmospheres, 2006. 111(19).

186. Bouchard, C. and L. Fortier, Effects of polynyas on the hatching season, early growth and survival of polar cod Boreogadus saida in the Laptev Sea. Marine Ecology-Progress Series, 2008. 355: p. 247-256.

187. Bouchard, G., K. Gajewski, and P.B. Hamilton, Freshwater diatom biogeography in the Canadian Arctic Archipelago. Journal of Biogeography, 2004. 31(12): p. 1955-1973.

188. Boucher, E., Y. Begin, and D. Arseneault, Hydro-climatic analysis of mechanical breakups reconstructed from tree-rings, Necopastic watershed, northern Quebec, Canada. Journal of Hydrology, 2009. 375(3-4): p. 373-382.

189. Boucher, O., et al., Prenatal exposure to methylmercury and PCBs affects distinct stages of information processing: An event-related potential study with Inuit children. Neurotoxicology, 2010. 31(4): p. 373-384.

190. Boucher, O., et al., The relation of lead neurotoxicity to the event-related potential P3b component in Inuit children from arctic Quebec. Neurotoxicology, 2009. 30(6): p. 1070-1077.

191. Boudries, H. and J.W. Bottenheim, Cl and Br atom concentrations during a surface boundary layer ozone depletion event in the Canadian high Arctic. Geophysical Research Letters, 2000. 27(4): p. 517-520.

192. Boudries, H., et al., Distribution and trends of oxygenated hydrocarbons in the high Arctic derived from measurements in the atmospheric boundary layer and interstitial snow air during the ALERT2000 field campaign. Atmospheric Environment, 2002. 36(15-16): p. 2573-2583.

193. Bouillon, R.C.L.P.A.D.M.S.J.L.M.L.C., Vernal distribution of dimethylsulphide, dimethylsulphoniopropionate, and dimethylsulphoxide in the North Water in 1998. Deep Sea Research Part II: Topical Studies in Oceanography, 2002. 49(22): p. 5171-5189.

194. Bourdages, L., et al., Physical properties of High Arctic tropospheric particles during winter. Atmospheric Chemistry and Physics, 2009. 9(18): p. 6881-6897.

195. Bourgeois, J.C., Seasonal and interannual pollen variability in snow layers of arctic ice caps. Review of Palaeobotany and Palynology, 2000. 108(1-2): p. 17-36.

196. Bourgeois, J.C., et al., A holocene ice-core pollen record from Ellesmere Island, Nunavut, Canada. Quaternary Research, 2000. 54(2): p. 275-283.

197. Bowd, A.D., Otitis media: health and social consequences for aboriginal youth in Canada's north. Int J Circumpolar Health, 2005. 64(1): p. 5-15.

198. Boyer, B.B., et al., Building a community-based participatory research center to investigate obesity and diabetes in Alaska Natives. Int J Circumpolar Health, 2005. 64(3): p. 281-90.

199. Boyer, B.B., et al., Sharing results from complex disease genetics studies: a community based participatory research approach. Int J Circumpolar Health, 2007. 66(1): p. 19-30.

200. Boyer, B.B., et al., Metabolic syndrome in Yup'ik Eskimos: the Center for Alaska Native Health Research (CANHR) Study. Obesity (Silver Spring), 2007. 15(11): p. 2535-40.

201. Bracco, A.P.J.P.R.S., Eddy formation near the west coast of Greenland. Journal of Physical Oceanography, 2008. 38(9): p. 1992-2002.

202. Braithwaite, R.J.R.S.C.B., Glaciological conditions in seven contrasting regions estimated with the degree-day model. Annals of Glaciology, 2007. 46: p. 297-302.

203. Brauch, J.P. and R. Gerdes, Response of the northern North Atlantic and Arctic oceans to a sudden change of the North Atlantic Oscillation. Journal of Geophysical Research-Oceans, 2005. 110(C11).

204. Braun, C., et al., Streamflow and suspended sediment transfer to Lake Sophia, Cornwallis Island, Nunavut, Canada. Arctic Antarctic and Alpine Research, 2000. 32(4): p. 456-465.

205. Braun, C., et al., Surface mass balance of the Ward Hunt Ice Rise and Ward Hunt Ice Shelf, Ellesmere Island, Nunavut, Canada. Journal of Geophysical Research-Atmospheres, 2004. 109(D22).

206. Braun, C.H.D.R.B.R.S.R.M.J., Hydrological and meteorological observations at Lake Tuborg, Ellesmere Island, Nunavut Canada. Polar Geography, 2000. 24(2): p. 83-97.

207. Braune, B.A., Temporal trends of organochlorines and mercury in seabird eggs from the Canadian Arctic, 1975-2003. Environmental Pollution, 2007. 148(2): p. 599-613.

208. Braune, B.M., G.M. Donaldson, and K.A. Hobson, Contaminant residues in seabird eggs from the Canadian Arctic. Part I. Temporal trends 1975-1998. Environmental Pollution, 2001. 114(1): p. 39-54.

209. Braune, B.M., K.A. Hobson, and B.J. Malone, Regional differences in collagen stable isotope and tissue trace element profiles in populations of long-tailed duck breeding in the Canadian Arctic. Science of the Total Environment, 2005. 346(1-3): p. 156-168.

210. Braune, B.M. and A.M. Scheuhammer, Trace element and metallothionein concentrations in seabirds from the Canadian Arctic. Environmental Toxicology and Chemistry, 2008. 27(3): p. 645-651.

211. Bravo, M.T., The rhetoric of scientific practice in Nunavut. Ecumene, 2000. 7(4): p. 468-474.

212. Breen, K. and E. Levesque, Proglacial succession of biological soil crusts and vascular plants: biotic interactions in the High Arctic. Canadian Journal of Botany-Revue Canadienne De Botanique, 2006. 84(11): p. 1714-1731.

213. Breen, K. and E. Levesque, The influence of biological soil crusts on soil characteristics along a High Arctic glacier foreland, Nunavut, Canada. Arctic Antarctic and Alpine Research, 2008. 40(2): p. 287-297.

214. Brimble, S.K., et al., Bioenrichment of trace elements in a series of ponds near a northern fulmar (Fulmarus glacialis) colony at Cape Vera, Devon Island. Canadian Journal of Fisheries and Aquatic Sciences, 2009. 66(6): p. 949-958.

215. Brimble, S.K., et al., HIGH ARCTIC PONDS RECEIVING BIOTRANSPORTED NUTRIENTS FROM A NEARBY SEABIRD COLONY ARE ALSO SUBJECT TO POTENTIALLY TOXIC LOADINGS OF ARSENIC, CADMIUM, AND ZINC. Environmental Toxicology and Chemistry, 2009. 28(11): p. 2426-2433.

216. Briner, J.P., et al., Multiple generations of interglacial lake sediment preserved beneath the Laurentide Ice Sheet. Geology, 2007. 35(10): p. 887-890.

217. Briner, J.P., A.C. Bini, and R.S. Anderson, Rapid early Holocene retreat of a Laurentide outlet glacier through an Arctic fjord. Nature Geoscience, 2009. 2(7): p. 496-499.

218. Briner, J.P., P.T. Davis, and G.H. Miller, Latest Pleistocene and Holocene glaciation of Baffin Island, Arctic Canada: key patterns and chronologies. Quaternary Science Reviews, 2009. 28(21-22): p. 2075-2087.

219. Briner, J.P., et al., A multi-proxy lacustrine record of Holocene climate change on northeastern Baffin Island, Arctic Canada. Quaternary Research, 2006. 65(3): p. 431-442.

220. Briner, J.P., et al., Last Glacial Maximum ice sheet dynamics in Arctic Canada inferred from young erratics perched on ancient tors. Quaternary Science Reviews, 2003. 22(5-7): p. 437-444.

221. Briner, J.P., et al., Cosmogenic exposure dating in arctic glacial landscapes: implications for the glacial history of northeastern Baffin Island, Arctic Canada. Canadian Journal of Earth Sciences, 2005. 42(1): p. 67-84.

222. Briner, J.P., et al., Cosmogenic radionuclides from fiord landscapes support differential erosion by overriding ice sheets. Geological Society of America Bulletin, 2006. 118(3-4): p. 406-420.

223. Briner, J.P., et al., Glacial erosion at the fjord onset zone and implications for the organization of ice flow on Baffin Island, Arctic Canada. Geomorphology, 2008. 97(1-2): p. 126-134.

224. Briner, J.P., et al., The deglaciation of Clyde Inlet, northeastern Baffin Island, Arctic Canada. Journal of Quaternary Science, 2007. 22(3): p. 223-232.

225. Brink, J.W., Inukshuk: Caribou drive lanes on southern Victoria Island, Nunavut, Canada. Arctic Anthropology, 2005. 42(1): p. 1-28.

226. Brodersen, K.P. and N.J. Anderson, Distribution of chironomids (Diptera) in low arctic West Greenland lakes: trophic conditions, temperature and environmental reconstruction. Freshwater Biology, 2002. 47(6): p. 1137-1157.

227. Brodo, F., The insects, mites and spider of hot weather creek, Ellesmere Island, Nunavut. Bulletin of the Geological Survey of Canada Environmental response to Climatic change in the Canadian High Arctic n529, 2000. 12(01): p. 145-173.

228. Brohan, P.W.G.A.R.W.C.W.D.W.C., Arctic marine climate of the early nineteenth century. Climate of the Past, 2010. 6(3): p. 315-324.

229. Brook, R.K.R.E.S., Observations of polar bear predatory behaviour toward caribou. Arctic, 2002. 55(2): p. 193-196.

230. Brown, L. and K.L. Young, Assessment of three mapping techniques to delineate lakes and ponds in a Canadian High Arctic wetland complex. Arctic, 2006. 59(3): p. 283-293.

231. Brown, P.C.M.D.J.J.G.J.J.A.N.S.R.J.T.C.W.A.R.W.R.E.K.J., Global ground-based electro-optical and radar observations of the 1999 Leonid shower: First results. Earth, Moon and Planets, 2000. 82: p. 167-190.

232. Brown, T.M., et al., Reduction of PCB Contamination in an Arctic Coastal Environment: A First Step in Assessing Ecosystem Recovery after the Removal of a Point Source. Environmental Science & Technology, 2009. 43(20): p. 7635-7642.

233. Brozena, J.M., et al., New aerogeophysical study of the Eurasia Basin and Lomonosov Ridge: Implications for basin development. Geology, 2003. 31(9): p. 825-828.

234. Bruce, M.G., et al., Epidemiology of Haemophilus influenzae serotype a, North American Arctic, 2000-2005. Emerg Infect Dis, 2008. 14(1): p. 48-55.

235. Brummer, B., S. Thiemann, and A. Kirchgassner, A cyclone statistics for the Arctic based on European Centre re-analysis data. Meteorology and Atmospheric Physics, 2000. 75(3-4): p. 233-250.

236. Bruneau, S., et al., Longitudinal observations (1987-1997) on the prevalence of middle ear disease and associated risk factors among Inuit children ofInukjuak, Nunavik, Quebec, Canada. International Journal of Circumpolar Health, 2001. 60(4): p. 632-9.

237. Buchardt, B., V. Bunch, and P. Helin, Fingernails and diet: Stable isotope signatures of a marine hunting community from modem Uummannaq, North Greenland. Chemical Geology, 2007. 244(1-2): p. 316-329.

238. Buckman, A.H., et al., Organochlorine contaminants in seven species of Arctic seabirds from northern Baffin Bay. Environmental Pollution, 2004. 128(3): p. 327-338.

239. Bulkow, L.R., et al., Risk factors for severe respiratory syncytial virus infection among Alaska native children. Pediatrics, 2002. 109(2): p. 210-6.

240. Burgess, D.O.S.M.J., Recent changes in areal extent of the Devon Ice Cap, Nunavut, Canada. Arctic, Antarctic, and Alpine Research, 2004. 36(2): p. 261-271.

241. Buschbom, J., Migration between continents: geographical structure and long-distance gene flow in Porpidia flavicunda (lichen-forming Ascomycota). Molecular Ecology, 2007. 16(9): p. 1835-1846.

242. Butt, C.M., et al., Spatial trends of perfluoroalkyl compounds in ringed seals (Phoca hispida) from the Canadian Arctic. Environmental Toxicology and Chemistry, 2008. 27(3): p. 542-553.

243. Butt, C.M., et al., Rapid response of arctic ringed seals to changes in perfluoroalkyl production. Environmental Science & Technology, 2007. 41(1): p. 42-49.

244. Butt, C.M.M.S.A.M.D.C.G.B.B.M., Prevalence of long-chained perfluorinated carboxylates in seabirds from the Canadian arctic between 1975 and 2004. Environmental Science and Technology, 2007. 41(10): p. 3521-3528.

245. Butterfield, N.J., Paleobiology of the late Mesoproterozoic (ca. 1200 Ma) Hunting Formation, Somerset Island, arctic Canada. Precambrian Research, 2001. 111(1-4): p. 235-256.

246. Byers, T., A. Smith, and M.L. Mallory, Diet of black guillemots and northern fulmars breeding beside a High Arctic polynya. Polar Biology, 2010. 33(4): p. 457-467.

247. Bystriansky, J.S., et al., Wild Arctic char (Salvelinus alpinus) upregulate gill Na+,K+-ATPase during freshwater migration. Physiological and Biochemical Zoology, 2007. 80(3): p. 270-282.

248. Caccianiga, M., S. Payette, and L. Filion, Biotic disturbance in expanding subarctic forests along the eastern coast of Hudson Bay. New Phytol, 2008. 178(4): p. 823-34.

249. Cadieux, M.C., G. Gauthier, and R.J. Hughes, Feeding ecology of Canada Geese (Branta canadensis interior) in sub-arctic inland tundra during brood-rearing. Auk, 2005. 122(1): p. 144-157.

250. Campbell, L.M., et al., Evidence for biomagnification of rubidium in freshwater and marine food webs. Canadian Journal of Fisheries and Aquatic Sciences, 2005. 62(5): p. 1161-1167.

251. Campbell, L.M., et al., Mercury and other trace elements in a pelagic Arctic marine food web (Northwater Polynya, Baffin Bay). Science of the Total Environment, 2005. 351: p. 247-263.

252. Campbell, R.G., et al., Mesozooplankton prey preference and grazing impact in the western Arctic Ocean. Deep-Sea Research Part Ii-Topical Studies in Oceanography, 2009. 56(17): p. 1274-1289.

253. Campbell, R.W., Overwintering habitat of Calanus finmarchicus in the North Atlantic inferred from autonomous profiling floats. Deep Sea Research Part I: Oceanographic Research Papers, 2008. 55(5): p. 630-645.

254. Canadian Ice, S., Digital ice concentrations grid point dataset for Canadian navigable waters, in Digital ice concentrations grid point dataset for Canadian navigable waters. 2000, CIS, Environment Canada, Ottawa.

255. Canadian Ice, S., Canadian regional ice charts, in Canadian regional ice charts. 2001, CIS, Environment Canada, Ottawa.

256. Carignan, J., C. Hillaire-Marcel, and A. de Vernal, Arctic vs. North Atlantic water mass exchanges in Fram Strait from Pb isotopes in sediments. Canadian Journal of Earth Sciences, 2008. 45(11): p. 1253-1263.

257. Carlson, A.E.C.P.U.B.E.J.R.G.M., Rapid holocene deglaciation of the labrador sector of the Laurentide Ice Sheet. Journal of Climate, 2007. 20(20): p. 5126-5133.

258. Carmichael, L.E., et al., Northwest passages: conservation genetics of Arctic Island wolves. Conservation Genetics, 2008. 9(4): p. 879-892.

259. Carmichael, L.E., et al., Free love in the far north: plural breeding and polyandry of arctic foxes (Alopex lagopus) on Bylot Island, Nunavut. Canadian Journal of Zoology-Revue Canadienne De Zoologie, 2007. 85(3): p. 338-343.

260. Caron, G., C. Michel, and M. Gosselin, Seasonal contributions of phytoplankton and fecal pellets to the organic carbon sinking flux in the North Water (northern Baffin Bay). Marine Ecology-Progress Series, 2004. 283: p. 1-13.

261. Carpenter, D.O., et al., Polychlorinated biphenyls in serum of the Siberian Yupik people from St. Lawrence Island, Alaska. Int J Circumpolar Health, 2005. 64(4): p. 322-35.

262. Carpenter, L.J., et al., Abiotic source of reactive organic halogens in the sub-arctic atmosphere? Environmental Science & Technology, 2005. 39(22): p. 8812-8816.

263. Cassady, J., A tundra of sickness: The uneasy relationship between toxic waste, TEK, and cultural survival. Arctic Anthropology, 2007. 44(1): p. 87-98.

264. Cassady, J., "Eating for outsiders": cancer causation discourse among the Inupiat of Arctic Alaska. Int J Circumpolar Health, 2008. 67(4): p. 374-83.

265. Casson, R.J., Anterior chamber depth and primary angle-closure glaucoma: an evolutionary perspective. Clin Experiment Ophthalmol, 2008. 36(1): p. 70-7.

266. Cattet, M.R.L., et al., Antibodies to canine distemper and phocine distemper viruses in polar bears from the Canadian Arctic. Journal of Wildlife Diseases, 2004. 40(2): p. 338-342.

267. Cavallo, S.M. and G.J. Hakim, Potential Vorticity Diagnosis of a Tropopause Polar Cyclone. Monthly Weather Review, 2009. 137(4): p. 1358-1371.

268. Cavell, J., Going native in the north: reconsidering British attitudes during the Franklin search, 1848-1859. Polar Record, 2009. 45(232): p. 25-35.

269. Cavell, J.N.J., The origins of Canada's first Eastern Arctic Patrol, 1919-1922. Polar Record, 2009. 45(2): p. 97-112.

270. Chamberlain, M. and K. Barclay, Psychosocial costs of transferring indigenous women from their community for birth. Midwifery, 2000. 16(2): p. 116-122.

271. Chambers, L.M.P.R.R.P.M.S., Rapid formation of the Small Isles Tertiary centre constrained by precise 40Ar/39Ar and U-Pb ages. Lithos, 2005. 79(3): p. 367-384.

272. Chang, E.R., T.A. Dickinson, and R.L. Jefferies, Seed flora of La Perouse Bay, Manitoba, Canada: a DELTA database of morphological and ecological characters. Canadian Journal of Botany-Revue Canadienne De Botanique, 2000. 78(4): p. 481-496.

273. Chang, W.J., et al., Biodegradation of semi- and non-volatile petroleum hydrocarbons in aged, contaminated soils from a sub-Arctic site: Laboratory pilot-scale experiments at site temperatures. Chemosphere, 2010. 80(3): p. 319-326.

274. Charbonneau-Roberts, G., et al., Body mass index may overestimate the prevalence of overweight and obesity among the Inuit. Int J Circumpolar Health, 2005. 64(2): p. 163-9.

275. Chaulk, K.R.G.J.R.P.C.M.W.A., Aspects of common eider nesting ecology in Labrador. Arctic, 2005. 58(1): p. 10-15.

276. Chen, J.L.W.C.R.S.K.W., S2 tide aliasing in GRACE time-variable gravity solutions. Journal of Geodesy, 2009. 83(7): p. 679-687.

277. Chen, Z.O.K.G.H.P.K.G.H., An object-based model for predicting the locations of undiscovered oil and gas resources, western Sverdrup Basin, Canada. Marine and Petroleum Geology, 2004. 21(6): p. 767-777.

278. Chen, Z.O.K.G., Geological risk mapping and prospect evaluation using multivariate and Bayesian statistical methods, western Sverdrup Basin of Canada. American Association of Petroleum Geologists Bulletin, 2006. 90(6): p. 859-872.

279. Cheng, S.M.F.J.M., Cultivation-independent and -dependent characterization of Bacteria resident beneath John Evans Glacier. FEMS Microbiology Ecology, 2007. 59(2): p. 318-330.

280. Cheng, W. and P.B. Rhines, Response of the overturning circulation to high-latitude fresh-water perturbations in the North Atlantic. Climate Dynamics, 2004. 22(4): p. 359-372.

281. Cherry, S.G., et al., Fasting physiology of polar bears in relation to environmental change and breeding behavior in the Beaufort Sea. Polar Biology, 2009. 32(3): p. 383-391.

282. Chevolot, M.W.P.H.J.S.W.T.O.J.L.P.J.R.A.D., Population structure and historical demography of the thorny skate (Amblyraja radiata, Rajidae) in the North Atlantic. Marine Biology, 2007. 151(4): p. 1275-1286.

283. Chin, K.T.J.E.J.B.J.S.A.C.S.W.J.H.D., Life in a temperate Polar sea: A unique taphonomic window on the structure of a Late Cretaceous Arctic marine ecosystem. Proceedings of the Royal Society B: Biological Sciences, 1652. 275(1652): p. 2675-2685.

284. Chiu, A., et al., Epidemiologic studies of PCB congener profiles in north American fish consuming populations. Journal of Environmental Science and Health Part C-Environmental Carcinogenesis & Ecotoxicology Reviews, 2004. 22(1): p. 13-36.

285. Chouinard, C., R. Fortier, and J.C. Mareschal, Recent climate variations in the subarctic inferred from three borehole temperature profiles in northern Quebec, Canada. Earth and Planetary Science Letters, 2007. 263(3-4): p. 355-369.

286. Choy, E.S., et al., An isotopic investigation of mercury accumulation in terrestrial food webs adjacent to an Arctic seabird colony. Science of the Total Environment, 2010. 408(8): p. 1858-1867.

287. Christopher Harrison, J., In search of the Wegener Fault: Re-evaluation of strike-slip displacements along and bordering Nares Strait. Polarforschung, 2004. 74(1): p. 129-160.

288. Chu, G.Q., et al., Mechanism of varve formation and paleoenvironmental research at Lake Bolterskardet, Svalbard, the Arctic. Acta Geologica Sinica-English Edition, 2006. 80(4): p. 557-563.

289. Chu, I., et al., Toxicological effects of in utero and lactational exposure of rats to a mixture of environmental contaminants detected in Canadian Arctic human populations. Journal of Toxicology and Environmental Health-Part a-Current Issues, 2008. 71(1-2): p. 93-108.

290. Chutko, K.J. and S.F. Lamoureux, Identification of coherent links between interannual sedimentary structures and daily meteorological observations in Arctic proglacial lacustrine varves: potentials and limitations. Canadian Journal of Earth Sciences, 2008. 45(1): p. 1-13.

291. Chutko, K.J. and S.F. Lamoureux, Biolaminated sedimentation in a High Arctic freshwater lake. Sedimentology, 2009. 56(6): p. 1642-1654.

292. Chutko, K.J. and S.F. Lamoureux, The influence of low-level thermal inversions on estimated melt-season characteristics in the central Canadian Arctic. International Journal of Climatology, 2009. 29(2): p. 259-268.

293. Clark, C.D., J.K. Knight, and J.T. Gray, Geomorphological reconstruction of the Labrador Sector of the Laurentide Ice Sheet. Quaternary Science Reviews, 2000. 19(13): p. 1343-1366.

294. Clark, C.D.S.C.R., Extent and basal characteristics of the M'Clintock Channel Ice Stream. Quaternary International Glacier deforming bed processes, 2001. 86: p. 81-101.

295. Clark, D.A. and D.S. Slocombe, Respect for Grizzly Bears: an Aboriginal Approach for Co-existence and Resilience. Ecology and Society, 2009. 14(1).

296. Clark, I.D.H.L.F.D.K.T.C.J.B.J.M.K.R.W.D.E.J.N.A.L., CO2 isotopes as tracers of firn air diffusion and age in an Arctic ice cap with summer melting, Devon Island, Canada. Journal of Geophysical Research D: Atmospheres, 2007. 112(1).

297. Claud, C.D.B.T.P., Associations between large-scale atmospheric circulation and polar low developments over the North Atlantic during winter. Journal of Geophysical Research D: Atmospheres, 2007. 112(12).

298. Cobbett, F.D., et al., GEM fluxes and atmospheric mercury concentrations (GEM, RGM and Hg-P) in the Canadian Arctic at Alert, Nunavut, Canada (February-June 2005). Atmospheric Environment, 2007. 41(31): p. 6527-6543.

299. Cochran, P.L. and A.L. Geller, The melting ice cellar: what native traditional knowledge is teaching us about global warming and environmental change. Am J Public Health, 2002. 92(9): p. 1404-9.

300. Cockburn, J.M.H. and S.F. Lamoureux, Inflow and lake controls on short-term mass accumulation and sedimentary particle size in a High Arctic lake: implications for interpreting varved lacustrine sedimentary records. Journal of Paleolimnology, 2008. 40(3): p. 923-942.

301. Cockell, C.S. and P. Lee, The biology of impact craters - a review. Biological Reviews, 2002. 77(3): p. 279-310.

302. Cockell, C.S., et al., Effects of asteroid and comet impacts on habitats for lithophytic organisms - A synthesis. Meteoritics & Planetary Science, 2005. 40(12): p. 1901-1914.

303. Cockell, C.S., et al., Impact-induced microbial endolithic habitats. Meteoritics & Planetary Science, 2002. 37(10): p. 1287-1298.

304. Cockell, C.S., et al., Microbiology and vegetation of micro-oases and polar desert, Haughton impact crater, Devon Island, Nunavut, Canada. Arctic Antarctic and Alpine Research, 2001. 33(3): p. 306-318.

305. Cockell, C.S., et al., The microbe-mineral environment and gypsum neogenesis in a weathered polar evaporite. Geobiology, 2010.

306. Cockell, C.S.S.M.D., Hypolithic colonization of opaque rocks in the arctic and antarctic polar desert. Arctic, Antarctic, and Alpine Research, 2006. 38(3): p. 335-342.

307. Cogley, J.G. and F. Jung-Rothenhausler, Uncertainty in digital elevation models of Axel Heiberg Island, Arctic Canada. Arctic Antarctic and Alpine Research, 2004. 36(2): p. 249-260.

308. Cogley, J.G.M.M.S., Hess Altitudes and Other Morphological Estimators of Glacier Equilibrium Lines. Arctic, Antarctic, and Alpine Research, 2003. 35(4): p. 482-488.

309. Cole, A.S.S.A., Effects of temperature and other atmospheric conditions on long-term gaseous mercury observations in the Arctic. Atmospheric Chemistry and Physics Discussions, 2009. 9(6): p. 27167-27194.

310. Cole, A.S.S.A., Trends in long-term gaseous mercury observations in the Arctic and effects of temperature and other atmospheric conditions. Atmospheric Chemistry and Physics, 2010. 10(10): p. 4661-4672.

311. Colgan, W. and M. Sharp, Combined oceanic and atmospheric influences on net accumulation on Devon ice cap, nunavut, Canada. Journal of Glaciology, 2008. 54(184): p. 28-40.

312. Collignon, B., Esprit des lieux et modèles culturels. La mutation des espaces domestiques en arctique inuit Translated Title: Sense of place and cultural identities: Inuit domestic spaces in transition. Annales de Geographie n620, 2001. 11(01): p. 383-404.

313. Collings, P., Aging and life course development in an Inuit community. Arctic Anthropology, 2000. 37(2): p. 111-125.

314. Collings, P., Housing policy, aging, and life course construction in a Canadian Inuit community. Arctic Anthropology, 2005. 42(2): p. 50-65.

315. Collings, P., Participant Observation and Phased Assertion as Research Strategies in the Canadian Arctic. Field Methods, 2009. 21(2): p. 133-153.

316. Coltrain, J.B., Sealing, whaling and caribou revisited: additional insights from the skeletal isotope chemistry of eastern Arctic foragers. Journal of Archaeological Science, 2009. 36(3): p. 764-775.

317. Coltrain, J.B., M.G. Hayes, and D.H. O'Rourke, Sealing, whaling and caribou: the skeletal isotope chemistry of Eastern Arctic foragers. Journal of Archaeological Science, 2004. 31(1): p. 39-57.

318. Comte, K.S.M.E.J.K.J.C.-M.A., Relationships between the Arctic and the Antarctic cyanobacteria; three Phormidium-like strains evaluated by a polyphasic approach. FEMS Microbiology Ecology v59 n2 (2007 02 01): 366-376 Journal Code: FEMS Microbiol. Ecol., 2007. 59(2): p. 366-376.

319. Condron, A., et al., Simulated Response of the Arctic Freshwater Budget to Extreme NAO Wind Forcing. Journal of Climate, 2009. 22(9): p. 2422-2437.

320. Cook, T.L., et al., Five thousand years of sediment transfer in a high arctic watershed recorded in annually laminated sediments from Lower Murray Lake, Ellesmere Island, Nunavut, Canada. Journal of Paleolimnology, 2009. 41(1): p. 77-94.

321. Cooke, C.A., et al., Reliance on Pb-210 Chronology Can Compromise the Inference of Preindustrial Hg Flux to Lake Sediments. Environmental Science & Technology, 2010. 44(6): p. 1998-2003.

322. Cooper, E.J., Reindeer grazing reduces seed and propagule bank in the High Arctic. Canadian Journal of Botany-Revue Canadienne De Botanique, 2006. 84(11): p. 1740-1752.

323. Coops, N.C., M.A. Wulder, and D. Iwanicka, An environmental domain classification of Canada using earth observation data for biodiversity assessment. Ecological Informatics, 2009. 4(1): p. 8-22.

324. Copland, L.M.D.R.W.L., Rapid loss of the Ayles Ice Shelf, Ellesmere Island, Canada. Geophysical Research Letters, 2007. 34(21).

325. Copland, L.S.M.J.N.P.B.R.G., The distribution of basal motion beneath a High Arctic polythermal glacier. Journal of Glaciology, 2003. 49(166): p. 407-414.

326. Cosens, S.E. and S. Innes, Distribution and numbers of bowhead whales (Balaena mysticetus) in northwestern Hudson Bay in August 1995. Arctic, 2000. 53(1): p. 36-41.

327. Cota, G.F., et al., Unexpectedly high radioactivity burdens in ice-rafted sediments from the Canadian Arctic Archipelago. Science of the Total Environment, 2006. 366(1): p. 253-261.

328. Cote, G., et al., Impact of Geese on the Limnology of Lakes and Ponds from Bylot Island (Nunavut, Canada). International Review of Hydrobiology, 2010. 95(2): p. 105-129.

329. Couzin, J., Polar science. Opening doors to native knowledge. Science, 2007. 315(5818): p. 1518-9.

330. Crate, S.A., Elder knowledge and sustainable livelihoods in post-Soviet Russia: Finding dialogue across the generations. Arctic Anthropology, 2006. 43(1): p. 40-51.

331. Craver, A., Domestic function and Inupiaq households. Int J Circumpolar Health, 2004. Suppl 1: p. 49-52.

332. Cremer, H., The planktonic diatom flora of a high arctic lake in East Greenland. Nordic Journal of Botany, 2006. 24(2): p. 235-244.

333. Cremer, H., et al., Hydrology and diatom phytoplankton of high arctic lakes and ponds on Store Koldewey, northeast Greenland. International Review of Hydrobiology, 2005. 90(1): p. 84-99.

334. Crew, H.S., Mette Newth's The 'Abduction', The 'Transformation', and Arctic colonialism: A postcolonial perspective (In relation to the Inuit of Greenland). Lion and the Unicorn, 2004. 28(3): p. 429-445.

335. Cuny, J., P.B. Rhines, and R. Kwok, Davis Strait volume, freshwater and heat fluxes. Deep-Sea Research Part I-Oceanographic Research Papers, 2005. 52(3): p. 519-542.

336. Curtis, T., S. Kvernmo, and P. Bjerregaard, Changing living conditions, life style and health. Int J Circumpolar Health, 2005. 64(5): p. 442-50.

337. Cusson, M., P. Archambault, and A. Aitken, Biodiversity of benthic assemblages on the Arctic continental shelf: historical data from Canada. Marine Ecology-Progress Series, 2007. 331: p. 291-304.

338. Czub, G., F. Wania, and M.S. McLachlan, Combining long-range transport and bioaccumulation considerations to identify potential arctic contaminants. Environmental Science & Technology, 2008. 42(10): p. 3704-3709.

339. Dale, C.W.P.D.G.M.C.G.S.N.A.S.F.M.E.R.M.F.J.G.L.L.M., Osmium isotopes in Baffin Island and West Greenland picrites: Implications for the 187Os/188Os composition of the convecting mantle and the nature of high 3He/4He mantle. Earth and Planetary Science Letters, 2009. 278(3): p. 267-277.

340. Dale, J.E.L.K., Sediments and biota of the marine coastal zone of Igloolik Island, Nunavut. Geographie Physique Et Quaternaire, 2006. 60(1): p. 63-80.

341. Dalhoff, F.L.L.M.I.J.R.S.S.B.-K.J.A.K.A.N.-H.H.L.S.R.J.A., Continental crust in the Davis Strait: New evidence from seabed sampling. Geological Survey of Denmark and Greenland Bulletin 2006. 10: p. 33-36.

342. Dalton, R., Palaeogenetics: Icy resolve. Nature, 2010. 463(7282): p. 724-5.

343. Dam, G.M.H.H.P.G.K.S.M.L.L.M.N.-H.H.P.A.K., Lithostratigraphy of the cretaceous-paleocene nuussuaq group, nuussuaq basin,west greenland. Geological Survey of Denmark and Greenland Bulletin, 2009. 19: p. 1-171.

344. Damaske, D.O.G.N., Volcanogenic sandstones as aeromagnetic markers on judge daly promontory and in Robeson Channel, northern Nares Strait. Polarforschung, 2004. 74(1): p. 9-19.

345. Darbyshire, F.A., Crustal structure across the Canadian High Arctic region from teleseismic receiver function analysis. Geophysical Journal International, 2003. 152(2): p. 372-391.

346. Darbyshire, F.A., Upper mantle structure of Arctic Canada from Rayleigh wave dispersion. Tectonophysics, 2005. 405(1-4): p. 1-23.

347. D'Arrigo, R., et al., Tree growth and inferred temperature variability at the North American Arctic treeline. Global and Planetary Change, 2009. 65(1-2): p. 71-82.

348. Dassau, T.M., et al., Peroxyacetyl nitrate photochemistry and interactions with the Arctic surface. Journal of Geophysical Research-Atmospheres, 2004. 109(D18).

349. Daugbjerg, N., Pyramimonas tychotreta, sp nov (Prasinophyceae), a new marine species from Antarctica: Light and electron microscopy of the motile stage and notes on growth rates. Journal of Phycology, 2000. 36(1): p. 160-171.

350. David, R.G., Representing the Inuit in contemporary British and Canadian juvenile non-fiction (Children's literature). Childrens Literature in Education, 2001. 32(2): p. 139-154.

351. Davis, A. and J.R. Wagner, Who knows? On the importance of identifying "Experts" when researching local ecological knowledge. Human Ecology, 2003. 31(3): p. 463-489.

352. Davis, P.T., et al., Preservation of Arctic landscapes overridden by cold-based ice sheets. Quaternary Research, 2006. 65(1): p. 156-163.

353. Dawson, J., et al., The carbon cost of polar bear viewing tourism in Churchill, Canada. Journal of Sustainable Tourism, 2010. 18(3): p. 319-336.

354. Dawson, M.R. and C.R. Harington, Boreameryx, an unusual new artiodactyl (Mammalia) from the Pliocene of Arctic Canada and endemism in Arctic fossil mammals. Canadian Journal of Earth Sciences, 2007. 44(5): p. 585-592.

355. Dawson, P., et al., Simulating the behaviour of light inside Arctic dwellings: implications for assessing the role of vision in task performance. World Archaeology, 2007. 39(1): p. 17-35.

356. Dawson, P.C., Interpreting variability in Thule Inuit architecture: A case study from the Canadian High Arctic. American Antiquity, 2001. 66(3): p. 453-470.

357. Dawson, P.C., Space syntax analysis of Central Inuit snow houses. Journal of Anthropological Archaeology, 2002. 21(4): p. 464-480.

358. Dawson, P.C., Unfriendly architecture: Using observations of Inuit spatial behavior to design culturally sustaining houses in Arctic Canada. Housing Studies, 2008. 23(1): p. 111-128.

359. Dawson, P.C. and R.M. Levy, A three-dimensional model of a Thule Inuit whale bone house. Journal of Field Archaeology, 2005. 30(4): p. 443-455.

360. Day, M.J., et al., Monodictys arctica, a new hyphomycete from the roots of Saxifraga oppositifolia collected in the Canadian High Arctic. Mycotaxon, 2006. 98: p. 261-272.

361. Day, R.D., et al., Murre eggs (Uria aalge and Uria lomvia) as indicators of mercury contamination in the Alaskan marine environment. Environ Sci Technol, 2006. 40(3): p. 659-65.

362. De Angelis, H. and J. Kleman, Palaeo-ice streams in the Foxe/Baffin sector of the Laurentide Ice Sheet. Quaternary Science Reviews, 2007. 26(9-10): p. 1313-1331.

363. de Boer, G., E.W. Eloranta, and M.D. Shupe, Arctic Mixed-Phase Stratiform Cloud Properties from Multiple Years of Surface-Based Measurements at Two High-Latitude Locations. Journal of the Atmospheric Sciences, 2009. 66(9): p. 2874-2887.

364. de March, B.G.E. and L.D. Postma, Molecular genetic stock discrimination of belugas (Delphinapterus leucas) hunted in eastern Hudson Bay, northern Quebec, Hudson Strait, and Sanikiluaq (Belcher Islands), Canada, and comparisons to adjacent populations. Arctic, 2003. 56(2): p. 111-124.

365. de Vernal, A., et al., Reconstruction of sea-surface conditions at middle to high latitudes of the Northern Hemisphere during the Last Glacial Maximum (LGM) based on dinoflagellate cyst assemblages. Quaternary Science Reviews, 2005. 24(7-9): p. 897-924.

366. de Vernal, A., et al., Dinoflagellate cyst assemblages as tracers of sea-surface conditions in the northern North Atlantic, Arctic and sub-Arctic seas: the new 'n=677' data base and its application for quantitative palaeoceanographic reconstruction. Journal of Quaternary Science, 2001. 16(7): p. 681-698.

367. de Vernal, A. and C. Hillaire-Marcel, Provincialism in trends and high frequency changes in the northwest North Atlantic during the Holocene. Global and Planetary Change, 2006. 54(3-4): p. 263-290.

368. Deering, K.N., et al., Chronic diseases and risk factors in Canada's northern populations: longitudinal and geographic comparisons. Can J Public Health, 2009. 100(1): p. 14-7.

369. Defossez, M., et al., Multi-Year Observations of Deep Water Renewal in Foxe Basin, Canada. Atmosphere-Ocean, 2008. 46(3): p. 377-390.

370. Defossez, M., et al., Analysis of a dense water pulse following mid-winter opening of polynyas in western Foxe Basin, Canada. Dynamics of Atmospheres and Oceans, 2010. 49(1): p. 54-74.

371. Degani, N., et al., Invasive bacterial diseases in northern Canada. Emerg Infect Dis, 2008. 14(1): p. 34-40.

372. Dehn, L.A., et al., Stable isotope and trace element status of subsistence-hunted bowhead and beluga whales in Alaska and gray whales in Chukotka. Marine Pollution Bulletin, 2006. 52(3): p. 301-319.

373. Dempson, J.B., M.F. O'Connell, and C.J. Schwarz, Spatial and temporal trends in abundance of Atlantic salmon, Salmo salar, in Newfoundland with emphasis on impacts of the 1992 closure of the commercial fishery. Fisheries Management and Ecology, 2004. 11(6): p. 387-402.

374. Dennard, S.T.F.A.T.M.M.A.T.M.A.C.S., Hierarchical analysis of a remote, Arctic, artisanal longline fishery. Ices Journal of Marine Science, 2010. 67(1): p. 41-51.

375. Dentinger, C.M., et al., Persistence of antibody to hepatitis B and protection from disease among Alaska natives immunized at birth. Pediatr Infect Dis J, 2005. 24(9): p. 786-92.

376. Denyszyn, S.W., D.W. Davis, and H.C. Halls, Paleomagnetism and U-Pb geochronology of the Clarence Head dykes, Arctic Canada: orthogonal emplacement of mafic dykes in a large igneous province. Canadian Journal of Earth Sciences, 2009. 46(3): p. 155-167.

377. Denyszyn, S.W., et al., Paleomagnetism and U-Pb geochronology of Franklin dykes in High Arctic Canada and Greenland: a revised age and paleomagnetic pole constraining block rotations in the Nares Strait region. Canadian Journal of Earth Sciences, 2009. 46(9): p. 689-705.

378. Denyszyn, S.W.H.H.C.D.D.W., A paleomagnetic, geochemical and U-Pb geochronological comparison of the thule (Greenland) and Devon Island (Canada) dyke swarms and its relevance to the nares strait problem. Polarforschung, 2004. 74(1): p. 63-75.

379. Derocher, A.E., Population ecology of polar bears at Svalbard, Norway. Population Ecology, 2005. 47(3): p. 267-275.

380. Derocher, A.E., et al., Contaminants in Svalbard polar bear samples archived since 1967 and possible population level effects. Science of the Total Environment, 2003. 301(1-3): p. 163-174.

381. Dery, S.J. and M.K. Yau, Simulation of an Arctic ground blizzard using a coupled blowing snow-atmosphere model. Journal of Hydrometeorology, 2001. 2(6): p. 579-598.

382. Descroix, A., et al., Macrozooplankton community patterns driven by water circulation in the St. Lawrence marine system, Canada. Marine Ecology-Progress Series, 2005. 302: p. 103-119.

383. Deshaies, A., S. Boudreau, and K.A. Harper, Assisted Revegetation in a Subarctic Environment: Effects of Fertilization on the Performance of Three Indigenous Plant Species. Arctic Antarctic and Alpine Research, 2009. 41(4): p. 434-441.

384. Deslippe, J.R.E.K.N., Molecular diversity of nifH genes from bacteria associated with high arctic dwarf shrubs. Microbial Ecology, 2006. 51(4): p. 516-525.

385. Desloges, J.R., et al., Holocene glacimarine sedimentary environments in fiords of Disko Bugt, West Greenland. Quaternary Science Reviews, 2002. 21(8-9): p. 947-963.

386. Desrosiers, P.M., et al., Tayara site (KbFk-7) and the Dorset period: Multidisciplinary research on a key Palaeoeskimo site of the Hudson Strait (Nunavik, Canada). Anthropologie, 2008. 112(4-5): p. 757-779.

387. Deutch, B., et al., Traditional and modern Greenlandic food - Dietary composition, nutrients and contaminants. Science of the Total Environment, 2007. 384(1-3): p. 106-119.

388. Deutch, B., et al., Dietary composition and contaminants in north Greenland, in the 1970s and 2004. Science of the Total Environment, 2006. 370(2-3): p. 372-381.

389. Deutch, B., et al., Contaminants, diet, plasma fatty acids and smoking in Greenland 1999-2005. Science of the Total Environment, 2007. 372(2-3): p. 486-496.

390. Deutch, B., H.S. Pedersen, and J.C. Hansen, Dietary composition in Greenland 2000, plasma fatty acids and persistent organic pollutants. Science of the Total Environment, 2004. 331(1-3): p. 177-188.

391. Deutch, B., et al., Smoking as a determinant of high organochlorine levels in Greenland. Arch Environ Health, 2003. 58(1): p. 30-6.

392. Dewailly, E., et al., Inuit are protected against prostate cancer. Cancer Epidemiology Biomarkers & Prevention, 2003. 12(9): p. 926-927.

393. Dewing, K., R.J. Sharp, and T. Muraro, Exploration history and mineral potential of the central Arctic Zn-Pb District, Nunavut. Arctic, 2006. 59(4): p. 415-427.

394. Dewing, K.H.J.C.M.U.P.B.R., A probable late neoproterozoic age for the Kennedy Channel and Ella Bay formations, northeastern Ellesmere Island and its implications for passive margin history of the Canadian Arctic. Canadian Journal of Earth Sciences, 2004. 41(9): p. 1013-1025.

395. Dewing, K.S.H., Analysis of large thermal maturity datasets: Examples from the Canadian Arctic Islands. International Journal of Coal Geology, 2009. 77(3): p. 436-448.

396. Dick, T.A., C.P. Gallagher, and A. Yang, Summer habitat use of Arctic char (Salvelinus alpinus) in a small Arctic lake, monitored by acoustic telemetry. Ecology of Freshwater Fish, 2009. 18(1): p. 117-125.

397. Dickson, R., et al., Current estimates of freshwater flux through Arctic and subarctic seas. Progress in Oceanography, 2007. 73(3-4): p. 210-230.

398. Dickson, R.R., R. Curry, and I. Yashayaev, Recent changes in the North Atlantic. Philosophical Transactions of the Royal Society of London Series a-Mathematical Physical and Engineering Sciences, 2003. 361(1810): p. 1917-1933.

399. Dickson, R.R., et al., The Arctic Ocean response to the North Atlantic oscillation. Journal of Climate, 2000. 13(15): p. 2671-2696.

400. Didiuk, A.B.F.R.S., Land cover mapping of Queen Maud Gulf Migratory Bird Sanctuary, Nunavut. Occasional Paper of the Canadian Wildlife Service n111, 2005. 03(01): p. 1-32.

401. Dietz, R., et al., Summer and fall movements of narwhals (Monodon monoceros) from northeastern Baffin Island towards northern Davis Strait. Arctic, 2001. 54(3): p. 244-261.

402. Dietz, R., et al., Comparison of contaminants from different trophic levels and ecosystems. Science of the Total Environment, 2000. 245(1-3): p. 221-231.

403. Dietz, R.S.H.C.H.-J.M.P.L.K.R.P.O.J., Movements of narwhals (Monodon monoceros) from Admiralty Inlet monitored by satellite telemetry. Polar Biology, 2008. 31(11): p. 1295-1306.

404. Dixon, O.A., Fossilized polyp remains in Silurian Heliolites (Anthozoa, Tabulata) from Nunavut, Arctic Canada. Lethaia, 2010. 43(1): p. 60-72.

405. Dodd, P.A., et al., Sources and fate of freshwater exported in the East Greenland Current. Geophysical Research Letters, 2009. 36.

406. Dodson, J.J., et al., Trans-Arctic dispersals and the evolution of a circumpolar marine fish species complex, the capelin (Mallotus villosus). Molecular Ecology, 2007. 16(23): p. 5030-5043.

407. Dolgov, A.V., Trophic structure of the Barents Sea fish assemblage with special reference to the cod stock recoverability. Progress in Oceanography Comparative Marine Ecosystem Structure and Function: Descriptors and Cgaracteristics, 2009. 81(1): p. 165-173.

408. Dorais, L.J., Comparing academic and aboriginal definitions of Arctic identities. Polar Record, 2005. 41(216): p. 1-10.

409. Dorais, L.J.S.S., Discourse and identity in the Baffin Region. Arctic Anthropology, 2000. 37(2): p. 92-110.

410. Doubleday, N.C. and J.P. Smol, Atlas and classification scheme of Arctic combustion particles suitable for paleoenvironmental work. Journal of Paleolimnology, 2005. 33(4): p. 393-431.

411. Douglas, M.S.V. and J.P. Smol, Eutrophication and recovery in the High Arctic: Meretta lake (Cornwallis Island, Nunavut, Canada) revisited. Hydrobiologia, 2000. 431(2-3): p. 193-204.

412. Douglas, M.S.V., et al., Prehistoric Inuit whalers affected arctic freshwater ecosystems. Proceedings of the National Academy of Sciences of the United States of America, 2004. 101(6): p. 1613-1617.

413. Douglas, M.S.V.S.J.P.B.W., Jr., Summary of paleolimnological investigations of High Arctic ponds at Cape Herschel, east-central Ellesmere Island, Nunavut. Bulletin of the Geological Survey of Canada Environmental response to Climatic change in the Canadian High Arctic n529, 2000. 12(01): p. 257-269.

414. Douglas, V.K., Childbirth among the Canadian Inuit: A review of the clinical and cultural literature. International Journal of Circumpolar Health, 2006. 65(2): p. 117-132.

415. Douglas, V.K., Arctic development and historical analysis: The use of historical methodology in addressing current issues in the Arctic. International Journal of Circumpolar Health, 2008. 67(2-3): p. 213-225.

416. Dowdeswell, E.K., J.A. Dowdeswell, and F. Cawkwell, On the glaciers of Bylot Island, Nunavut, Arctic Canada. Arctic Antarctic and Alpine Research, 2007. 39(3): p. 402-411.

417. Dowdeswell, J.A., et al., An origin for laminated glacimarine sediments through sea-ice build-up and suppressed iceberg rafting. Sedimentology, 2000. 47(3): p. 557-576.

418. Driscoll-Engelstad, B., Dance of the loon: Symbolism and continuity in Copper Inuit ceremonial clothing. Arctic Anthropology, 2005. 42(1): p. 33-47.

419. Drobot, S.D. and M.R. Anderson, An improved method for determining snowmelt onset dates over Arctic sea ice using scanning multichannel microwave radiometer and Special Sensor Microwave/Imager data. Journal of Geophysical Research-Atmospheres, 2001. 106(D20): p. 24033-24049.

420. Drobot, S.D.A.M.R., Comparison of interannual snowmelt-onset dates with atmospheric conditions. Annals of Glaciology Papers from the International Symposium on Sea Ice and its Interactions with the Ocean, Atmosphere and Biosphere held in Fairbanks, Alaska, USA, 2000. 33: p. 79-84.

421. Drucker, D.G., et al., Influence of forage preferences and habitat use on 13C and 15N abundance in wild caribou (Rangifer tarandus caribou) and moose (Alces alces) from Canada. Isotopes in Environmental and Health Studies, 2010. 46(1): p. 107-121.

422. Drue, C. and G. Heinemann, Airborne investigation of arctic boundary-layer fronts over the marginal ice zone of the Davis Strait. Boundary-Layer Meteorology, 2001. 101(2): p. 261-292.

423. Drue, C. and G. Heinemann, Turbulence structures over the marginal ice zone under flow parallel to the ice edge: Measurements and parameterizations. Boundary-Layer Meteorology, 2002. 102(1): p. 83-116.

424. Duarte, H.F., N.L. Dias, and S.R. Maggiotto, Assessing daytime downward longwave radiation estimates for clear and cloudy skies in Southern Brazil. Agricultural and Forest Meteorology, 2006. 139(3-4): p. 171-181.

425. Dubey, J.P., et al., Isolation and genetic characterization of Toxoplasma gondii from raccoons (Procyon lotor), cats (Felis domesticus), striped skunk (Mephitis mephitis), black bear (Ursus americanus), and cougar (Puma concolor) from Canada. The Journal of Parasitology, 2008. 94(1): p. 42-45.

426. Duffy, L., et al., Arctic Peoples and Beyond: research opportunities in neuroscience and behaviour. Int J Circumpolar Health, 2007. 66(3): p. 264-75.

427. Dugan, H.A., et al., Hydrological and sediment yield response to summer rainfall in a small high Arctic watershed. Hydrological Processes, 2009. 23(10): p. 1514-1526.

428. Duguay, C.R. and P.M. Lafleur, Determining depth and ice thickness of shallow sub-Arctic lakes using space-borne optical and SAR data. International Journal of Remote Sensing, 2003. 24(3): p. 475-489.

429. Duhaime, G., et al., The impact of dietary changes among the Inuit of Nunavik (Canada): A socioeconomic assessment of possible public health recommendations dealing with food contamination. Risk Analysis, 2004. 24(4): p. 1007-1018.

430. Duhaime, G., et al., Social cohesion and living conditions in the Canadian Arctic: From theory to measurement. Social Indicators Research, 2004. 66(3): p. 295-317.

431. Dumont, D.G.Y.A.T.E., Modeling the dynamics of the North Water polynya ice bridge. Journal of Physical Oceanography, 2009. 39(6): p. 1448-1461.

432. Dunlap, E. and C.C.L. Tang, Modelling the mean circulation of Baffin Bay. Atmosphere-Ocean, 2006. 44(1): p. 99-109.

433. Dunlap, E.D.B.M.T.C.C.L., Short-wave radiation and sea ice in Baffin Bay. Atmosphere Ocean, 2007. 45(4): p. 195-210.

434. Duston, J., T. Astatkie, and S.B. Murray, Effect of salinity at constant 10 degrees C on grow-out of anadromous Arctic charr from Labrador. Aquaculture, 2007. 273(4): p. 679-686.

435. Dyck, M.G. and E. Kebreab, ESTIMATING THE ENERGETIC CONTRIBUTION OF POLAR BEAR (URSUS MARITIMUS) SUMMER DIETS TO THE TOTAL ENERGY BUDGET. Journal of Mammalogy, 2009. 90(3): p. 585-593.

436. Dyck, M.G. and S. Romberg, Observations of a wild polar bear (Ursus maritimus) successfully fishing Arctic charr (Salvelinus alpinus) and Fourhorn sculpin (Myoxocephalus quadricornis). Polar Biology, 2007. 30(12): p. 1625-1628.

437. Dyke, A.S., The Steensby Inlet Ice Stream in the context of the deglaciation of Northern Baffin Island, Eastern Arctic Canada. Earth Surface Processes and Landforms, 2008. 33(4): p. 573-592.

438. Dyke, A.S., et al., The Laurentide and Innuitian ice sheets during the Last Glacial Maximum. Quaternary Science Reviews, 2002. 21(1-3): p. 9-31.

439. Dyke, A.S. and J. England, Canada's most northerly postglacial bowhead whales (Balaena mysticetus): Holocene sea-ice conditions and polynya development. Arctic, 2003. 56(1): p. 14-20.

440. Dyke, A.S. and J.M. Savelle, Holocene history of the Bering Sea bowhead whale (Balaena mysticetus) in its Beaufort Sea summer grounds off southwestern Victoria Island, western Canadian Arctic. Quaternary Research, 2001. 55(3): p. 371-379.

441. Dyke, A.S. and J.M. Savelle, Paleoeskimo Demography and Sea-Level History, Kent Peninsula and King William Island, Central Northwest Passage, Arctic Canada. Arctic, 2009. 62(4): p. 371-392.

442. Eaton, A.K., et al., Surface energy balance of the western and central Canadian subarctic: Variations in the energy balance among five major terrain types. Journal of Climate, 2001. 14(17): p. 3692-3703.

443. Ebbesen, H.K.A.M.M.L.J.S.M.S.T.S., The 8.2 ka cooling event related to extensive melting of the Greenland Ice Sheet. Climate of the Past Discussions, 2008. 4(5): p. 1219-1235.

444. Eberle, J.J., A new 'tapir' from Ellesmere Island, Arctic Canada - Implications for northern high latitude palaeobiogeography and tapir palaeobiology. Palaeogeography, Palaeoclimatology, Palaeoecology, 2005. 227(4): p. 311-322.

445. Eberle, J.J., Early Eocene Brontotheriidae (Perissodactyla) from the Eureka Sound Group, Ellesmere Island, Canadian High Arctic - Implications for brontothere origins and high-latitude dispersal. Journal of Vertebrate Paleontology, 2006. 26(2): p. 381-386.

446. Ebinghaus, R., et al., Antarctic springtime depletion of atmospheric mercury. Environmental Science & Technology, 2002. 36(6): p. 1238-1244.

447. Eddie, B., et al., Effect of environmental variables on eukaryotic microbial community structure of land-fast Arctic sea ice. Environmental Microbiology, 2010. 12(3): p. 797-809.

448. Eddy, S.F.H.H.T., Integrated management planning in Canada's northern marine environment: Engaging coastal communities. Arctic, 2002. 55(3): p. 291-301.

449. Edlund, S.A.A.B.T.G.M., Vegetation patterns on Fosheim Penisula, Ellemere Island, Nunavut. Bulletin of the Geological Survey of Canada Environmental response to Climatic change in the Canadian High Arctic n529, 2000. 12(01): p. 129-143.

450. Edmonds, H.N., et al., Distribution and behavior of anthropogenic I-129 in water masses ventilating the North Atlantic Ocean. Journal of Geophysical Research-Oceans, 2001. 106(C4): p. 6881-6894.

451. Edwards, H.G., et al., Analysis of yellow "fat" deposits on Inuit boots. Spectrochim Acta A Mol Biomol Spectrosc, 2009. 73(3): p. 561-5.

452. Egevang, C. and D. Boertmann, Ross's gulls (Rhodostethia rosea) breeding, in Greenland: A review, with special emphasis on records from 1979 to 2007. Arctic, 2008. 61(3): p. 322-328.

453. Eglinton, L.B., et al., Organic geochemical characterization of a Miocene core sample from Haughton impact structure, Devon Island, Nunavut, Canadian High Arctic. Organic Geochemistry, 2006. 37(6): p. 688-710.

454. Eichelberger, L.P., Living in utility scarcity: energy and water insecurity in Northwest Alaska. Am J Public Health, 2010. 100(6): p. 1010-8.

455. Elberling, B., Temperature and oxygen control on pyrite oxidation in frozen mine tailings. Cold Regions Science and Technology, 2005. 41(2): p. 121-133.

456. Elberling, B., A. Schippers, and W. Sand, Bacterial and chemical oxidation of pyritic mine tailings at low temperatures. Journal of Contaminant Hydrology, 2000. 41(3-4): p. 225-238.

457. Elliott, K.H., et al., Seabird foraging behaviour indicates prey type. Marine Ecology-Progress Series, 2008. 354: p. 289-303.

458. Elliott, K.H., et al., CENTRAL-PLACE FORAGING IN AN ARCTIC SEABIRD PROVIDES EVIDENCE FOR STORER-ASHMOLE'S HALO. Auk, 2009. 126(3): p. 613-625.

459. Elliott, K.H.D.G.K.B.R.D.G.A.J., Underwater and above-water search patterns of an Arctic seabird: Reduced searching at small spatiotemporal scales. Behavioral Ecology and Sociobiology, 2009. 63(12): p. 1773-1785.

460. Elliott, K.H.G.A.J., Mass-length relationships and energy content of fishes and invertebrates delivered to nestling Thick-billed Murres Uria lomvia in the Canadian Arctic, 1981-2007. Marine Ornithology, 2008. 36(1): p. 25-34.

461. Elliott, K.H.G.A.J., Accuracy of depth recorders. Waterbirds, 2009. 32(1): p. 183-191.

462. Ellis, C.J.R.L., Century-scale development of polygon-patterned tundra wetland, Bylot Island (73&#x00B0; N, 80&#x00B0; W). Ecology, 2004. 85(4): p. 963-978.

463. Else, B.G.T., et al., Observations of sea surface fCO(2) distributions and estimated air-sea CO2 fluxes in the Hudson Bay region (Canada) during the open water season. Journal of Geophysical Research-Oceans, 2008. 113(C8).

464. Else, B.G.T., J.J. Yackel, and T.N. Papakyriakou, Application of satellite remote sensing techniques for estimating air-sea CO2 fluxes in Hudson Bay, Canada during the ice-free season. Remote Sensing of Environment, 2008. 112(9): p. 3550-3562.

465. Embry, A., Crockerland - The source area for the Triassic to Middle Jurassic strata of Northern Axel Heiberg Island, Canadian Arctic Islands. Bulletin of Canadian Petroleum Geology, 2009. 57(2): p. 129-140.

466. Enachescu, M.E., Favorable geology, advanced technology may unlock Labrador's substantial resource. Oil and Gas Journal, 2006. 104(23): p. 29-34.

467. Enarson, D.A., N. Beyers, and L.X. Zhang, The tuberculosis pandemic today: routes of transmission and new target groups. Scand J Infect Dis, 2001. 33(1): p. 9-12.

468. England, J., et al., Late wisconsinan buildup and wastage of the innuitian Ice Sheet across southern Ellesmere Island, Nunavut. Canadian Journal of Earth Sciences, 2004. 41(1): p. 39-61.

469. England, J., I.R. Smith, and D.J.A. Evans, The last glaciation of east-central Ellesmere Island, Nunavut: ice dynamics, deglacial chronology, and sea level change. Canadian Journal of Earth Sciences, 2000. 37(10): p. 1355-1371.

470. England, J.H.L.T.R.L.D.S.B.J.M.S.T.G.E.D.J.A., A millennial-scale record of Arctic Ocean sea ice variability and the demise of the Ellesmere Island ice shelves. Geophysical Research Letters, 2008. 35(19).

471. Eno, R.V., Crystal two: The origin of Iqaluit. Arctic, 2003. 56(1): p. 63-75.

472. Eriksen, B.B.M.B.K.H.G.R.S.L.E.M.J.E.P.C.L., Environment and site descriptions of an ecological baseline study in the Canadian Arctic: The Tundra Northwest Expedition 1999 (Nunavut and Northwest Territories, Canada). Polarforschung, 2003. 73(2): p. 77-88.

473. Estrada, S.H.-K.F.M.F.T.F., Paleocene alkaline volcanism in the Nares Strait region: Evidence from volcanic pebbles. International Journal of Earth Sciences, 2010. 99(4): p. 863-890.

474. Estrada, S.P.K.H.-K.F.v.G.W., Geology, magmatism and structural evolution of the Yelverton Bay area, northern Ellesmere Island, Arctic Canada. Polarforschung, 2003. 73(2): p. 59-75.

475. Eugster, W., et al., Land-atmosphere energy exchange in Arctic tundra and boreal forest: available data and feedbacks to climate. Global Change Biology, 2000. 6: p. 84-115.

476. Evans, S.J.A.G.K.J.S.J., Central Baffin electromagnetic experiment (CBEX): Mapping the North American Central Plains (NACP) conductivity anomaly in the Canadian arctic. Physics of the Earth and Planetary Interiors, 2005. 150(1): p. 107-122.

477. Fagel, N., et al., Smectite composition as a tracer of deep circulation: the case of the Northern North Atlantic. Marine Geology, 2001. 172(3-4): p. 309-330.

478. Fagel, N.H.-M.C., Glacial/interglacial instabilities of the Western Boundary Under Current during the last 365&#x00A0;kyr from Sm/Nd ratios of the sedimentary clay-size fractions at ODP site 646 (Labrador Sea). Marine Geology, 2006. 232(1): p. 87-99.

479. Falconer, C.M.N.E.M.M.L., Breeding biology and provisioning of nestling snow buntings in the Canadian High Arctic. Polar Biology, 2008. 31(4): p. 483-489.

480. Falcon-Lang, H.J.C.A.Z.M.R.A., Palaeoecology of Late Cretaceous polar vegetation preserved in the Hansen Point Volcanics, NW Ellesmere Island, Canada. Palaeogeography, Palaeoclimatology, Palaeoecology, 2004. 212(1): p. 45-64.

481. Falina, A.S., Interannual variability of water mass properties over the transatlantic section along 60 degrees N in the subpolar North Atlantic. Oceanology, 2005. 45(4): p. 474-487.

482. Falk, K., et al., Foraging behaviour of thick-billed murres breeding in different sectors of the North Water polynya: an inter-colony comparison. Marine Ecology-Progress Series, 2002. 231: p. 293-302.

483. Falkner, K.K.S.M.W.R.A.A.K.M.J.S.J.H., Dissolved oxygen extrema in the Arctic Ocean halocline from the North Pole to the Lincoln Sea. Deep Sea Research Part I: Oceanographic Research Papers, 2005. 52(7): p. 1138-1154.

484. Fallu, M.A., Fossils from lake sediments in northern Québec and Labrador: A window into past climate changes. Arctic, 2001. 54(4): p. 468-471.

485. Fallu, M.A., et al., AMS C-14 dating of tundra lake sediments using chironomid head capsules. Journal of Paleolimnology, 2004. 31(1): p. 11-22.

486. Farish, M.L.P.W., High modernism in the Arctic: planning Frobisher Bay and Inuvik. Journal of Historical Geography, 2009. 35(3): p. 517-544.

487. Fediuk, K., et al., Vitamin C in Inuit traditional food and women's diets. Journal of Food Composition and Analysis, 2002. 15(3): p. 221-235.

488. Fee, E., et al., Public health service dentist examines an Alaska native child, 1951. Am J Public Health, 2002. 92(9): p. 1420.

489. Felzer, B.A. and S.L. Thompson, Evaluation of a regional climate model for paleoclimate applications in the Arctic. Journal of Geophysical Research-Atmospheres, 2001. 106(D21): p. 27407-27424.

490. Ferguson, M.A.D., L. Gauthier, and F. Messier, Range shift and winter foraging ecology of a population of Arctic tundra caribou. Canadian Journal of Zoology-Revue Canadienne De Zoologie, 2001. 79(5): p. 746-758.

491. Ferguson, M.A.D. and F. Messier, Mass emigration of Arctic Tundra caribou from a traditional winter range: Population dynamics and physical condition. Journal of Wildlife Management, 2000. 64(1): p. 168-178.

492. Ferucci, E.D., D.W. Templin, and A.P. Lanier, Rheumatoid arthritis in American Indians and Alaska Natives: a review of the literature. Semin Arthritis Rheum, 2005. 34(4): p. 662-7.

493. Filee, J., et al., Marine T4-type bacteriophages, a ubiquitous component of the dark matter of the biosphere. Proc Natl Acad Sci U S A, 2005. 102(35): p. 12471-6.

494. Finkelstein, S.A. and K. Gaiewski, A palaeolimnological record of diatomcommunity dynamics and late-Holocene climatic changes from Prescott Island, Nunavut, central Canadian Arctic. Holocene, 2007. 17(6): p. 803-812.

495. Finkelstein, S.A. and K. Gajewski, Responses of Fragilarioid-dominated diatom assemblages in a small Arctic lake to Holocene climatic changes, Russell Island, Nunavut, Canada. Journal of Paleolimnology, 2008. 40(4): p. 1079-1095.

496. Finkelstein, S.A., J.M. Ross, and J.K. Adams, Spatiotemporal Variability in Arctic Climates of the Past Millennium: Implications for the Study of Thule Culture on Melville Peninsula, Nunavut. Arctic Antarctic and Alpine Research, 2009. 41(4): p. 442-454.

497. Fischer, J.S.F.A.D.M., Boundary circulation at the exit of the Labrador Sea. Journal of Physical Oceanography, 2004. 34(7): p. 1548-1570.

498. Fisher, T.G.W.N.L.T.V.H.I., Deglaciation ages and meltwater routing in the Fort McMurray region, northeastern Alberta and northwestern Saskatchewan, Canada. Quaternary Science Reviews, 2009. 28(17): p. 1608-1624.

499. Fisk, A.T., et al., Using anthropogenic contaminants and stable isotopes to assess the feeding ecology of greenland sharks. Ecology, 2002. 83(8): p. 2162-2172.

500. Fogelqvist, E., et al., Greenland-Scotland overflow studied by hydro-chemical multivariate analysis. Deep-Sea Research Part I-Oceanographic Research Papers, 2003. 50(1): p. 73-102.

501. Forbes, B.C. and F. Stammler, Arctic climate change discourse: the contrasting politics of research agendas in the West and Russia. Polar Research, 2009. 28(1): p. 28-42.

502. Forbes, L.B., et al., Brucellosis in ringed seals and harp seals from Canada. lforbes@em.agr.ca. J Wildl Dis, 2000. 36(3): p. 595-8.

503. Ford, J.D. and T. Pearce, What we know, do not know, and need to know about climate change vulnerability in the western Canadian Arctic: a systematic literature review. Environmental Research Letters, 2010. 5(1).

504. Forest, A., et al., Three-year assessment of particulate organic carbon fluxes in Amundsen Gulf (Beaufort Sea): Satellite observations and sediment trap measurements. Deep-Sea Research Part I-Oceanographic Research Papers, 2010. 57(1): p. 125-142.

505. Forsius, H., et al., Exfoliation syndrome: Frequency, gender distribution and association with climatically induced alterations of the cornea and conjunctiva. Acta Ophthalmologica Scandinavica, 2002. 80(5): p. 478-484.

506. Fortier, D.A.M., Late Holocene syngenetic ice-wedge polygons development, Bylot Island, Canadian Arctic Archipelago. Canadian Journal of Earth Sciences, 2004. 41(8): p. 997-1012.

507. Fortier, D.A.M., Frost-cracking conditions, Bylot Island, eastern Canadian Arctic archipelago. Permafrost and Periglacial Processes, 2005. 16(2): p. 145-161.

508. Fortier, D.A.M.P.F., A late-Holocene record of loess deposition in ice-wedge polygons reflecting wind activity and ground moisture conditions, Bylot Island, eastern Canadian Arctic. Holocene, 2006. 16(5): p. 635-646.

509. Fortier, D.S.Y.A.M., Observation of rapid drainage system development by thermal erosion of ice wedges on Bylot Island, Canadian Arctic Archipelago. Permafrost and Periglacial Processes, 2007. 18(3): p. 229-243.

510. Fortier, L., et al., Survival of Arctic cod larvae (Boreogadus saida) in relation to sea ice and temperature in the Northeast Water Polynya (Greenland Sea). Canadian Journal of Fisheries and Aquatic Sciences, 2006. 63(7): p. 1608-1616.

511. Fortier, M., et al., Climatic and biological forcing of the vertical flux of biogenic particles under seasonal Arctic sea ice. Marine Ecology-Progress Series, 2002. 225: p. 1-16.

512. Fortin, D. and S.F. Lamoureux, Multidecadal hydroclimatic variability in northeastern North America since 1550 AD. Climate Dynamics, 2009. 33(2-3): p. 427-432.

513. Fortin, M.C. and K. Gajewski, Holocene climate change and its effect on lake ecosystem production on Northern Victoria Island, Canadian Arctic. Journal of Paleolimnology, 2010. 43(2): p. 219-234.

514. Foster, K.L., et al., The role of Br-2 and BrCl in surface ozone destruction at polar sunrise. Science, 2001. 291(5503): p. 471-474.

515. Fouilland, E., et al., Nitrogen uptake by heterotrophic bacteria and phytoplankton in Arctic surface waters. Journal of Plankton Research, 2007. 29(4): p. 369-376.

516. Frajka-Williams, E. and P.B. Rhines, Physical controls and interannual variability of the Labrador Sea spring phytoplankton bloom in distinct regions. Deep-Sea Research Part I-Oceanographic Research Papers, 2010. 57(4): p. 541-552.

517. Frajka-Williams, E.R.P.B.E.C.C., Physical controls and mesoscale variability in the Labrador Sea spring phytoplankton bloom observed by Seaglider. Deep Sea Research Part I: Oceanographic Research Papers, 2009. 56(12): p. 2144-2161.

518. Francis, D.R.W.A.P.W.I.R.M.G.H., Interglacial and Holocene temperature reconstructions based on midge remains in sediments of two lakes from Baffin Island, Nunavut, Arctic Canada. Palaeogeography, Palaeoclimatology, Palaeoecology, 2006. 236(1): p. 107-124.

519. Francus, P., et al., Paleoclimate studies of minerogenic sediments using annually resolved textural parameters. Geophysical Research Letters, 2002. 29(20).

520. Francus, P., et al., Limnological and sedimentary processes at Sawtooth Lake, Canadian High Arctic, and their influence on varve formation. Journal of Paleolimnology, 2008. 40(3): p. 963-985.

521. Frank, T.D., L.C. Kah, and T.W. Lyons, Changes in organic matter production and accumulation as a mechanism for isotopic evolution in the Mesoproterozoic ocean. Geological Magazine, 2003. 140(4): p. 397-420.

522. Fraser, A., et al., The Polar Environment Atmospheric Research Laboratory UV-visible Ground-Based Spectrometer: First measurements of O-3, NO2, BrO, and OClO columns. Journal of Quantitative Spectroscopy & Radiative Transfer, 2009. 110(12): p. 986-1004.

523. Fraser, A., et al., Intercomparison of UV-visible measurements of ozone and NO2 during the Canadian Arctic ACE validation campaigns: 2004-2006. Atmospheric Chemistry and Physics, 2008. 8(6): p. 1763-1788.

524. Fraser, A.S.K.D.J.R.K.T.E.M.C.T.M.C.N.F.N.C.R.W.J.W.K., Intercomparison of UV-visible measurements of ozone and NO2 during the Canadian Arctic ACE validation campaigns: 2004-2006. Atmospheric Chemistry and Physics Discussions, 2007. 7(6): p. 16283-16347.

525. Fraser, D.J., et al., Integrating traditional and evolutionary knowledge in biodiversity conservation: a population level case study. Ecology and Society, 2006. 11(2).

526. Fraser, M.H., et al., Medicinal plants of Cree communities (Quebec, Canada): antioxidant activity of plants used to treat type 2 diabetes symptoms. Canadian Journal of Physiology and Pharmacology, 2007. 85(11): p. 1200-1214.

527. Fratantoni, P.S. and M.S. McCartney, Freshwater export from the Labrador Current to the North Atlantic Current at the Tail of the Grand Banks of Newfoundland. Deep-Sea Research Part I-Oceanographic Research Papers, 2010. 57(2): p. 258-283.

528. Fratantoni, P.S.P.R.S., The western North Atlantic shelfbreak current system in summer. Journal of Physical Oceanography, 2007. 37(10): p. 2509-2533.

529. Frechette, B. and A. de Vernal, Relationship between Holocene climate variations over southern Greenland and eastern Baffin Island and synoptic circulation pattern. Climate of the Past, 2009. 5(3): p. 347-359.

530. Frechette, B., et al., Methodological basis for quantitative reconstruction of air temperature and sunshine from pollen assemblages in Arctic Canada and Greenland. Quaternary Science Reviews, 2008. 27(11-12): p. 1197-1216.

531. Frechette, B., A. de Vernal, and P.J.H. Richard, Holocene and Last Interglacial cloudiness in eastern Baffin Island, Arctic Canada. Canadian Journal of Earth Sciences, 2008. 45(11): p. 1221-1234.

532. Frechette, B.d.V.A.W.A.P.M.G.H.R.P.J.H., Vegetation and climate of the last interglacial on Baffin Island, Arctic Canada. Palaeogeography, Palaeoclimatology, Palaeoecology, 2006. 236(1): p. 91-106.

533. Freitas, C., et al., Ringed seal post-moulting movement tactics and habitat selection. Oecologia, 2008. 155(1): p. 193-204.

534. Frew, R.D., et al., The oxygen isotope composition of water masses in the northern North Atlantic. Deep-Sea Research Part I-Oceanographic Research Papers, 2000. 47(12): p. 2265-2286.

535. Friborg, J., et al., A population-based registry study of infant mortality in the Arctic: Greenland and Denmark, 1973-1997. Am J Public Health, 2004. 94(3): p. 452-7.

536. Friborg, J., et al., Cancer in Greenlandic Inuit 1973-1997: A cohort study. International Journal of Cancer, 2003. 107(6): p. 1017-1022.

537. Friborg, J., et al., Cancer in Greenlandic Inuit 1973-1997. Int J Circumpolar Health, 2004. 63 Suppl 2: p. 195-8.

538. Fricke, M., et al., Development of a community-based medical rehabilitation programme in the Kivalliq Region of Nunavut, Canada. Int J Circumpolar Health, 2004. 63 Suppl 2: p. 101-6.

539. Friedman, A. and E. Debicka, FLEXIBLE DESIGN OF PUBLIC HOUSING IN IQALUIT, NUNAVUT, CANADA. Open House International, 2009. 34(4): p. 26-35.

540. Friedrich, C. and W.H. De Smet, The rotifer fauna of arctic sea ice from the Barents Sea, Laptev Sea and Greenland Sea. Hydrobiologia, 2000. 432(1-3): p. 73-89.

541. Friedrich, T.T.A.T.O.M.A.R.D.M., Orbital modulation of millennial-scale climate variability in an earth system model of intermediate complexity. Climate of the Past Discussions, 2009. 5(4): p. 2019-2051.

542. Friesen, T.M., Analogues at Iqaluktuuq: The social context of archaeological inference in Nunavut, Arctic Canada. World Archaeology, 2002. 34(2): p. 330-345.

543. Friesen, T.M., Kitigaaryuit: A portrait of the Mackenzie Inuit in the 1890s, based on the journals of Isaac O. Stringer. Arctic Anthropology, 2004. 41(2): p. 222-237.

544. Friesen, T.M., Contemporaneity of Dorset and Thule cultures in the North American Arctic: New radiocarbon dates from Victoria Island, Nunavut. Current Anthropology, 2004. 45(5): p. 685-691.

545. Friesen, T.M., Hearth rows, hierarchies and Arctic hunter-gatherers: the construction of equality in the Late Dorset period. World Archaeology, 2007. 39(2): p. 194-214.

546. Friesen, T.M. and C.D. Arnold, The timing of the Thule migration: New dates from the western Canadian Arctic. American Antiquity, 2008. 73(3): p. 527-538.

547. Fu, D.W.K.A.B.P.F.B.C.D.S.K.S.K.F.P.K.F.L.P.M.O.M.R., Simultaneous atmospheric measurements using two Fourier transform infrared spectrometers at the Polar Environment Atmospheric Research Laboratory during spring 2006, and comparisons with the Atmospheric Chemistry Experiment-Fourier Transform Spectrometer. Atmospheric Chemistry and Physics Discussions, 2008. 8(2): p. 5305-5358.

548. Fukamachi, Y.O.K.I.T.T.K.N.W.M.M.G., Sea ice thickness in the southwestern Sea of Okhotsk revealed by a moored ice-profiling sonar. Journal of Geophysical Research C: Oceans, 2006. 111(9).

549. Funck, T.D.S.A.J.H.R.S.M.H.R.I.D., A refraction seismic image of the sediments in Kennedy Channel, Northern Nares Strait. Polarforschung, 2004. 74(1): p. 41-50.

550. Funck, T.J.H.R.D.S.A.R.I.D., A refraction seismic transect from Greenland To Ellesmere Island, Canada: The crustal structure in southern Nares Strait. Polarforschung, 2004. 74(1): p. 97-112.

551. Funck, T.J.H.R.L.K.E.K.F., Seismic study of the transform-rifted margin in Davis Strait between Baffin Island (Canada) and Greenland: What happens when a plume meets a transform. Journal of Geophysical Research B: Solid Earth, 2007. 112(4).

552. Furdui, V.I. and F. Tomassini, Trends and Sources of Perchlorate in Arctic Snow. Environmental Science & Technology, 2010. 44(2): p. 588-592.

553. Gadallah, F.L., Historical vegetation reconstruction of a degraded sub-arctic coastal marsh using Landsat imagery and ancillary data. Ecoscience, 2002. 9(2): p. 271-279.

554. Gagnon, A.S. and W.A. Gough, East-west asymmetry in long-term trends of landfast ice thickness in the Hudson Bay region, Canada. Climate Research, 2006. 32(3): p. 177-186.

555. Gagnon, C.A. and D. Berteaux, Integrating Traditional Ecological Knowledge and Ecological Science: a Question of Scale. Ecology and Society, 2009. 14(2).

556. Gagnon, R.E., et al., Large-scale hull loading of sea ice, lake ice, and ice in Tuktoyaktuk Harbour. Journal of Offshore Mechanics and Arctic Engineering-Transactions of the Asme, 2001. 123(4): p. 159-169.

557. Gajewski, K. and M. Frappier, A holocene lacustrine record of environmental change in northeastern Prince of Wales Island, Nunavut, Canada. Boreas, 2001. 30(4): p. 285-289.

558. Gallagher, C.P. and T.A. Dick, Historical and Current Population Characteristics and Subsistence Harvest of Arctic Char from the Sylvia Grinnell River, Nunavut, Canada. North American Journal of Fisheries Management, 2010. 30(1): p. 126-141.

559. Gallagher, C.P. and T.A. Dick, Trophic structure of a landlocked Arctic char Salvelinus alpinus population from southern Baffin Island, Canada. Ecology of Freshwater Fish, 2010. 19(1): p. 39-50.

560. Galloway, T., T.K. Young, and G.M. Egeland, Emerging obesity among preschool-aged Canadian Inuit children: results from the Nunavut Inuit Child Health Survey. International Journal of Circumpolar Health, 2010. 69(2): p. 151-157.

561. Gantner, N., et al., Variations in Stable Isotope Fractionation of Hg in Food Webs of Arctic Lakes. Environmental Science & Technology, 2009. 43(24): p. 9148-9154.

562. Gantner, N., et al., TEMPORAL TRENDS OF MERCURY, CESIUM, POTASSIUM, SELENIUM, AND THALLIUM IN ARCTIC CHAR (SALVELINUS ALPINUS) FROM LAKE HAZEN, NUNAVUT, CANADA: EFFECTS OF TROPHIC POSITION, SIZE, AND AGE. Environmental Toxicology and Chemistry, 2009. 28(2): p. 254-263.

563. Garneau, M.E., et al., New and regenerated production during a late summer bloom in an Arctic polynya. Marine Ecology-Progress Series, 2007. 345: p. 13-26.

564. Garthe, S.M.W.A.H.A.C.G.R.J.F., Contrasting foraging tactics by northern gannets (Sula bassana) breeding in different oceanographic domains with different prey fields. Marine Biology, 2007. 151(2): p. 687-694.

565. Gaston, A.J., Results of monitoring Thick-billed Murre populations in the eastern Canadian Arctic, 1976-2000. Occasional Paper of the Canadian Wildlife Service Studies of high latitude seabirds, 1976. 5(09): p. 13-50.

566. Gaston, A.J., Have changes in hunting pressure affected the Thick-billed Murre population at Coats Island, Nunavut? Occasional Paper of the Canadian Wildlife Service Studies of high latitude seabirds, 1976. 5(09): p. 5-12.

567. Gaston, A.J., Synchronous fluctuations of thick-billed murre (Uria lomvia) colonies in the Eastern Canadian Arctic suggest population regulation in winter. Auk, 2003. 120(2): p. 362-370.

568. Gaston, A.J., S. Descamps, and H.G. Gilchrist, Reproduction and survival of Glaucous Gulls breeding in an Arctic seabird colony. Journal of Field Ornithology, 2009. 80(2): p. 135-145.

569. Gaston, A.J., et al., Status, trends and attendance patterns of the northern fulmar Fulmarus glacialis in Nunavut, Canada. Arctic, 2006. 59(2): p. 165-178.

570. Gaston, A.J., et al., Birds and marine mammals in southwestern Foxe Basin, Nunavut, Canada. Polar Record, 2007. 43(224): p. 33-47.

571. Gates, L.M.J.N.P.B.B., A glass ramp: Shallow-water Permian spiculitic chert sedimentation, Sverdrup Basin, Arctic Canada. Sedimentary Geology, 2004. 168(1): p. 125-147.

572. Gauchard, P.A., et al., Atmospheric particle evolution during a nighttime atmospheric mercury depletion event in sub-Arctic at Kuujjuarapik/Whapmagoostui, Quebec, Canada. Science of the Total Environment, 2005. 336(1-3): p. 215-224.

573. Gauthier-Ouellet, M.B.L.D.M.C.F.K.T.L., Spatiotemporal dynamics of the Atlantic salmon (Salmo salar) Greenland fishery inferred from mixed-stock analysis. Canadian Journal of Fisheries and Aquatic Sciences, 2009. 66(12): p. 2040-2051.

574. Gazzard, G., Primary angle-closure glaucoma: a challenge for the 21st Century. Clin Experiment Ophthalmol, 2008. 36(1): p. 3-4.

575. Gee, D.G.F.H.H.N.H.A.K., From the early Paleozoic platforms of Baltica and Laurentia to the Caledonide Orogen of Scandinavia and Greenland. Episodes, 2008. 31(1): p. 44-51.

576. Gerbush, M.R., D.A.R. Kristovich, and N.F. Laird, Mesoscale boundary layer and heat flux variations over pack ice-covered Lake Erie. Journal of Applied Meteorology and Climatology, 2008. 47(2): p. 668-682.

577. Gerlings, J.F.T.J.H.R.L.K.E.K.F., Seismic evidence for plume-derived volcanism during formation of the continental margin in southern Davis Strait and northern Labrador Sea. Geophysical Journal International, 2009. 176(3): p. 980-994.

578. Gesink, D., et al., Developing a culturally competent and socially relevant sexual health survey with an urban Arctic community. Int J Circumpolar Health, 2010. 69(1): p. 25-37.

579. Gessner, B.D., EARLY CHILDHOOD HEMOGLOBIN LEVEL IS A STRONG PREDICTOR OF HEMOGLOBIN LEVELS DURING LATER CHILDHOOD AMONG LOW-INCOME ALASKA CHILDREN. International Journal of Circumpolar Health, 2009. 68(5): p. 459-470.

580. Gibbons, R.W.G.R.E., Discovering a long-forgotten aspect of Northern studies: The relationship of the inuit to the North American/European explorers. Polar Geography, 2002. 26(1): p. 1-3.

581. Giberson, D.J., S.K. Burian, and M. Shouldice, Life history of the northern mayfly Baetis bundyae in Rankin Inlet, Nunavut, Canada, with updates to the list of mayflies of Nunavut. Canadian Entomologist, 2007. 139(5): p. 628-642.

582. Gibson, R.J., R.L. Haedrich, and C.M. Wernerheirn, Loss of fish habitat as a consequence of inappropriately constructed stream crossings. Fisheries, 2005. 30(1): p. 10-17.

583. Gilbert, M.T.R., et al., mtDNA from hair and nail clarifies the genetic relationship of the 15th century Qilakitsoq inuit mummies. American Journal of Physical Anthropology, 2007. 133(2): p. 847-853.

584. Gilbert, R., Environmental assessment from the sedimentary record of high-latitude fiords. Geomorphology, 2000. 32(3-4): p. 295-314.

585. Gilbert, R.A.A.E., Preliminary results on the Quaternary sedimentary environment and benthos of part of Cañon Fiord, Fosheim Peninsula, Ellesmere Island, Nunavut. Bulletin of the Geological Survey of Canada Environmental response to Climatic change in the Canadian High Arctic n529, 2000. 12(01): p. 197-205.

586. Gilbreath, S. and P.H. Kass, Adverse birth outcomes associated with open dumpsites in Alaska Native Villages. Am J Epidemiol, 2006. 164(6): p. 518-28.

587. Gilbreath, S. and P.H. Kass, Fetal and neonatal deaths and congenital anomalies associated with open dumpsites in Alaska Native villages. Int J Circumpolar Health, 2006. 65(2): p. 133-47.

588. Gilchrist, G., M. Mallory, and F. Merkel, Can local ecological knowledge contribute to wildlife management? Case studies of migratory birds. Ecology and Society, 2005. 10(1).

589. Gilchrist, H.G. and G.J. Robertson, Observations of marine birds and mammals wintering at polynyas and ice edges in the Belcher Islands, Nunavut, Canada. Arctic, 2000. 53(1): p. 61-68.

590. Girard, E., J.P. Blanchet, and Y. Dubois, Effects of arctic sulphuric acid aerosols on wintertime low-level atmospheric ice crystals, humidity and temperature at Alert, Nunavut. Atmospheric Research, 2005. 73(1-2): p. 131-148.

591. Gislason, A., Seasonal and spatial variability in egg production and biomass of Calanus finmarchicus around Iceland. Marine Ecology-Progress Series, 2005. 286: p. 177-192.

592. Givelet, N., et al., Atmospheric mercuty accumulation rates between 5900 and 800 calibrated years BP in the high Artic of Canada recorded by peat hummocks. Environmental Science & Technology, 2004. 38(19): p. 4964-4972.

593. Gleason, J.S. and K.D. Rode, Polar Bear Distribution and Habitat Association Reflect Long-term Changes in Fall Sea Ice Conditions in the Alaskan Beaufort Sea. Arctic, 2009. 62(4): p. 405-417.

594. Goodfellow, B.W., Relict non-glacial surfaces in formerly glaciated landscapes. Earth-Science Reviews, 2007. 80(1-2): p. 47-73.

595. Goodman, K.J., K. Jacohson, and S.V. van Zanten, Helicobacter pylori infection in Canadian and related Arctic Aboriginal populations. Canadian Journal of Gastroenterology, 2008. 22(3): p. 289-295.

596. Goosse, H.S.F.M.H.R.J.O.J.D., Decadal variability in high northern latitudes as simulated by an intermediate-complexity climate model. Annals of Glaciology Papers from the International Symposium on Sea Ice and its Interactions with the Ocean, Atmosphere and Biosphere held in Fairbanks, Alaska, USA, 2000. 33: p. 525-532.

597. Gordillo, S. and A.E. Aitken, Palaeoenvironmental interpretation of late quaternary marine molluscan assemblages, Canadian Arctic Archipelago. Geographie Physique Et Quaternaire, 2001. 54(3): p. 301-315.

598. Gordillo, S. and A.E. Aitken, Postglacial succession and palaeoecology of Late Quaternary macrofaunal assemblages from the central Canadian Arctic Archipelago. Boreas, 2001. 30(1): p. 61-72.

599. Goropashnaya, A.V., et al., Relationships between plasma adiponectin and body fat distribution, insulin sensitivity, and plasma lipoproteins in Alaskan Yup'ik Eskimos: the Center for Alaska Native Health Research study. Metabolism, 2009. 58(1): p. 22-9.

600. Goto-Azuma, K. and R.M. Koerner, Ice core studies of anthropogenic sulfate and nitrate trends in the Arctic. Journal of Geophysical Research-Atmospheres, 2001. 106(D5): p. 4959-4969.

601. Goto-Azuma, K.K.R.M.F.D.A., An ice-core record over the last two centuries from Penny Ice Cap, Baffin Island, Canada. Annals of Glaciology Papers from the International Symposium on Ice Cores and Climate held in Kangerlussuaq, Greenland, 2001. 35: p. 29-35.

602. Gough, W.A.R.C.A., Sea-level variation in Hudson Bay, Canada, from tide-gauge data. Arctic, Antarctic, and Alpine Research, 2000. 32(3): p. 331-335.

603. Gould, W.A., D.A. Walker, and D. Biesboer, Combining research and education: Bioclimatic zonation along a Canadian Arctic transect. Arctic, 2003. 56(1): p. 45-54.

604. Gradinger, R., B. Bluhm, and K. Iken, Arctic sea-ice ridges-Safe heavens for sea-ice fauna during periods of extreme ice melt? Deep-Sea Research Part Ii-Topical Studies in Oceanography, 2010. 57(1-2): p. 86-95.

605. Gradinger, R., et al., Abundance and composition of the sea-ice meiofauna in off-shore pack ice of the Beaufort Gyre in summer 2002 and 2003. Polar Biology, 2005. 28(3): p. 171-181.

606. Gradinger, R.R., M.R. Kaufman, and B.A. Bluhm, Pivotal role of sea ice sediments in the seasonal development of near-shore Arctic fast ice biota. Marine Ecology-Progress Series, 2009. 394: p. 49-63.

607. Graneli, W.B.S.P.A., Phosphorus limitation of bacterial growth in high Arctic lakes and ponds. Aquatic Sciences, 2004. 66(4): p. 430-439.

608. Grannas, A.M., et al., A study of photochemical and physical processes affecting carbonyl compounds in the Arctic atmospheric boundary layer. Atmospheric Environment, 2002. 36(15-16): p. 2733-2742.

609. Granskog, M.A., et al., Coastal conduit in southwestern Hudson Bay (Canada) in summer: Rapid transit of freshwater and significant loss of colored dissolved organic matter. Journal of Geophysical Research-Oceans, 2009. 114.

610. Granskog, M.A., et al., Distribution, characteristics and potential impacts of chromophoric dissolved organic matter (CDOM) in Hudson Strait and Hudson Bay, Canada. Continental Shelf Research, 2007. 27(15): p. 2032-2050.

611. Grasby, S.E.B.B.A.C.C.L.T.G.L.J.T.G.D.W., Biogeochemical sulphur cycle in an extreme environment - Life beneath a high arctic glacier, Nunavut, Canada. Journal of Geochemical Exploration, 2003. 78-79: p. 71-74.

612. Grasby, S.E.B.B., Intrabasin variability of the carbon-isotope record across the Permian-Triassic transition, Sverdrup Basin, Arctic Canada. Chemical Geology, 2008. 253(3): p. 141-150.

613. Grasby, S.E.B.B., Latest Permian to Early Triassic basin-to-shelf anoxia in the Sverdrup Basin, Arctic Canada. Chemical Geology, 2009. 264(1): p. 232-246.

614. Gray, J.T., Patterns of ice flow and deglaciation chronology for southern coastal margins of Hudson Strait and Ungava Bay. Bulletin of the Geological Survey of Canada Marine Geology of Hudson Strait and Ungava Bay, Eastern Arctic Canada: Late Quarternary Sediments, Depositional Environments, and Late Glacia Deglacial History Derived from Marine Terrestrial Studies n566, 2001. 05(01): p. 31-55.

615. Greenwood, D.R.B.J.F.S.R.Y., How wet was the Arctic Eocene rain forest? Estimates of precipitation from Paleogene Arctic macrofloras. Geology, 2010. 38(1): p. 15-18.

616. Gregersen, U., The north-east Baffin Bay region, offshore Greenland - A new frontier petroleum exploration region. Geological Survey of Denmark and Greenland Bulletin, 2008. 15: p. 65-68.

617. Gregersen, U., The north-east Baffin Bay region, offshore Greenland - a new frontier petroleum exploration region. Geological Survey of Denmark and Greenland Bulletin, 2008(15): p. 65-68.

618. Gregersen, U.B.T., Structures and hydrocarbon prospectivity in the northern Davis Strait area, offshore West Greenland. Petroleum Geoscience, 2008. 14(2): p. 151-166.

619. Griffis, T.J., W.R. Rouse, and J.M. Waddington, Scaling net ecosystem CO2 exchange from the community to landscape-level at a subarctic fen. Global Change Biology, 2000. 6(4): p. 459-473.

620. Grist, A.M. and M. Zentilli, The thermal history of the Nares Strait, Kane Basin, and Smith Sound region in Canada and Greenland: constraints from apatite fission-track and (U-Th-Sm)/He dating. Canadian Journal of Earth Sciences, 2005. 42(9): p. 1547-1569.

621. Grist, A.M.Z.M., Preliminary apatite fission track thermal history modelling of the Nares Strait region of eastern Ellesmere Island and Northwestern Greenland. Polarforschung, 2004. 74(1): p. 113-127.

622. Grumet, N.S., et al., Variability of sea-ice extent in baffin bay over the last millennium. Climatic Change, 2001. 49(1-2): p. 129-145.

623. Gruyer, N., G. Gauthier, and D. Berteaux, Cyclic dynamics of sympatric lemming populations on Bylot Island, Nunavut, Canada. Canadian Journal of Zoology-Revue Canadienne De Zoologie, 2008. 86(8): p. 910-917.

624. Gruyer, N., G. Gauthier, and D. Berteaux, Demography of two lemming species on Bylot Island, Nunavut, Canada. Polar Biology, 2010. 33(6): p. 725-736.

625. Gudmundsson, G.A., et al., Radar observations of Arctic bird migration at the Northwest Passage, Canada. Arctic, 2002. 55(1): p. 21-43.

626. Guemas, V. and D. Salas-Melia, Simulation of the Atlantic meridional overturning circulation in an atmosphere-ocean global coupled model. Part I: a mechanism governing the variability of ocean convection in a preindustrial experiment. Climate Dynamics, 2008. 31(1): p. 29-48.

627. Guiguer, K., et al., Using stable isotopes to confirm the trophic ecology of Arctic charr morphotypes from Lake Hazen, Nunavut, Canada. Journal of Fish Biology, 2002. 60(2): p. 348-362.

628. Guimbaud, C., et al., Snowpack processing of acetaldehyde and acetone in the Arctic atmospheric boundary layer. Atmospheric Environment, 2002. 36(15-16): p. 2743-2752.

629. Gustafsson, O., et al., Process-diagnostic patterns of chlorobiphenyl congeners in two radiochronologically characterized sediment cores from the northern Baffin Bay. Chemosphere, 2001. 45(6-7): p. 759-766.

630. Haak, H., et al., Formation and propagation of great salinity anomalies. Geophysical Research Letters, 2003. 30(9).

631. Haas, C.H.S.D.M., Comparison of the sea-ice thickness distribution in the Lincoln Sea and adjacent Arctic Ocean in 2004 and 2005. Annals of Glaciology 2006. 44: p. 247-252.

632. Hadley, K.R., et al., Nutrient enrichment in the High Arctic associated with Thule Inuit whalers: a paleolimnological investigation from Ellesmere Island (Nunavut, Canada). Hydrobiologia, 2010. 649(1): p. 129-138.

633. Hadley, K.R., et al., Ecological influences of Thule Inuit whalers on high Arctic pond ecosystems: a comparative paleolimnological study from Bathurst Island (Nunavut, Canada). Journal of Paleolimnology, 2010. 44(1): p. 85-93.

634. Haggarty, J., et al., Psychiatric disorders in an arctic community. Canadian Journal of Psychiatry-Revue Canadienne De Psychiatrie, 2000. 45(4): p. 357-362.

635. Haggarty, J., et al., A study of multi-media suicide education in Nunavut. Arch Suicide Res, 2006. 10(3): p. 277-81.

636. Haggarty, J.M., et al., Suicidality in a Sample of Arctic Households. Suicide and Life-Threatening Behavior, 2008. 38(6): p. 699-707.

637. Haggarty, J.M., et al., Seasonal affective disorder in an Arctic community. Acta Psychiatrica Scandinavica, 2002. 105(5): p. 378-384.

638. Haile, J.M.S.C.J., Technical and design innovations in run-of-river projects. International Water Power and Dam Construction, 2009. 61(3): p. 26-29.

639. Hailey, D., et al., Achievements and challenges on policies for allied health professionals who use telehealth in the Canadian Arctic. J Telemed Telecare, 2005. 11 Suppl 2: p. S39-41.

640. Hakansson, L., et al., Late Pleistocene glacial history of Jameson Land, central East Greenland, derived from cosmogenic Be-10 and Al-26 exposure dating. Boreas, 2009. 38(2): p. 244-260.

641. Hakansson, L., et al., Be-10 ages from central east Greenland constrain the extent of the Greenland ice sheet during the Last Glacial Maximum. Quaternary Science Reviews, 2007. 26(19-21): p. 2316-2321.

642. Hakkinen, S., Freshening of the Labrador Sea surface waters in the 1990s: Another great salinity anomaly? Geophysical Research Letters, 2002. 29(24).

643. Haldorsen, T. and T. Tynes, Cancer in the Sami population of North Norway, 1970-1997. European Journal of Cancer Prevention, 2005. 14(1): p. 63-68.

644. Hall, A.M. and W.M. Phillips, Weathering pits as indicators of the relative age of granite surfaces in the Cairngorm Mountains, Scotland. Geografiska Annaler Series a-Physical Geography, 2006. 88A(2): p. 135-150.

645. Hall, C.M., et al., High-latitude mesospheric mean winds: A comparison between Tromso (69 degrees N) and Svalbard (78 degrees N). Journal of Geophysical Research-Atmospheres, 2003. 108(D19).

646. Hall, F.R.A.J.T.K.M.S.L.M., Studies of sediment colour, whole-core magnetic susceptibility, and sediment magnetism of the Hudson Strait-Labrador Shelf region: CSS Hudson cruises 90023 and 93034. Bulletin of the Geological Survey of Canada Marine Geology of Hudson Strait and Ungava Bay, Eastern Arctic Canada: Late Quarternary Sediments, Depositional Environments, and Late Glacia Deglacial History Derived from Marine Terrestrial Studies n566, 2001. 05(01): p. 161-170.

647. Hall, R.L.H.L.V.M.R.A., Middle Albian (lower Cretaceous) gastroplitinid ammonites and dinoflagellates from the Christopher formation (dragon mountain, Axel Heiberg Island, Canadian Arctic Islands) and a revision of the genus Pseudogastroplites Jeletzky, 1980. Journal of Paleontology, 2005. 79(2): p. 219-241.

648. Hambley, G.W. and S.F. Lamoureux, Recent summer climate recorded in complex varved sediments, Nicolay Lake, Cornwall Island, Nunavut, Canada. Journal of Paleolimnology, 2006. 35(3): p. 629-640.

649. Hameed, S.P.S., The dominant influence of the Icelandic Low on the position of the Gulf Stream northwall. Geophysical Research Letters, 2004. 31(9): p. 1-4.

650. Hamel, D.G.M.V.A.D.H.-M.C., Organic-walled microfossils and geochemical tracers: Sedimentary indicators of productivity changes in the North Water and northern Baffin Bay during the last centuries. Deep Sea Research Part II: Topical Studies in Oceanography, 2002. 49(22): p. 5277-5295.

651. Hamel, J.F.B.P.E.I.M.A., Exogonadal oogenesis in a temperate holothurian. Biological Bulletin, 2007. 213(2): p. 101-109.

652. Hamilton, L.C. and R.O. Rasmussen, Population, Sex Ratios and Development in Greenland. Arctic, 2010. 63(1): p. 43-52.

653. Hamilton, P.B.G.K.M.R.L.D.R.S., Physical, chemical, and biological characteristics of lakes from the Slidre River basin on Fosheim Peninsula, Ellesmere Island, Nunavut. Bulletin of the Geological Survey of Canada Environmental response to Climatic change in the Canadian High Arctic n529, 2000. 12(01): p. 235-248.

654. Hamilton, S., et al., Healthy living in Nunavut: an on-line nutrition course for inuit communities in the Canadian arctic. Int J Circumpolar Health, 2004. 63(3): p. 243-50.

655. Hammond, M., C. Rennie, and J. Dickson, Distance education for Inuit smoking counsellors in Canada: A case report. International Journal of Circumpolar Health, 2007. 66(4): p. 284-286.

656. Hamrick, K.J. and J. Smith, Potential future studies on the nutritional status among indigenous peoples in Alaska and the Russian Far East: preliminary assessment of the Social Transition in the North data set. Int J Circumpolar Health, 2004. Suppl 1: p. 43-8.

657. Handa, I.T., R. Harmsen, and R.L. Jefferies, Patterns of vegetation change and the recovery potential of degraded areas in a coastal marsh system of the Hudson Bay lowlands. Journal of Ecology, 2002. 90(1): p. 86-99.

658. Handa, I.T. and R.L. Jefferies, Assisted revegetation trials in degraded salt-marshes. Journal of Applied Ecology, 2000. 37(6): p. 944-958.

659. Handa, T.H.R.J.R.L., Trophic interactions in arctic salt-marshes: The effect of goose grazing on patterns of vegetation change in the Hudson Bay lowlands. Verhandlungen der Gesellschaft fur Okologie, 2001. 31.

660. Hanesiak, J.M., et al., Local and regional albedo observations of arctic first-year sea ice during melt ponding. Journal of Geophysical Research-Oceans, 2001. 106(C1): p. 1005-1016.

661. Hansen, J.C., Environmental contaminants and human health in the Arctic. Toxicol Lett, 2000. 112-113: p. 119-25.

662. Hansen, J.C., B. Deutch, and H.S. Pedersen, Selenium status in Greenland Inuit. Sci Total Environ, 2004. 331(1-3): p. 207-14.

663. Hardie, D.C., The evolutionary ecology of arctic fishes. Arctic, 2003. 56(4): p. 430-433.

664. Hardie, D.C., Population genetics, life history, and ecology of arctic marine fishes. Arctic, 2004. 57(4): p. 444-448.

665. Hardie, D.C., R.M. Gillett, and J.A. Hutchings, The effects of isolation and colonization history on the genetic structure of marine-relict populations of Atlantic cod (Gadus morhua) in the Canadian Arctic. Canadian Journal of Fisheries and Aquatic Sciences, 2006. 63(8): p. 1830-1839.

666. Hardy, I., Composition of sediments in Hudson Strait and Ungava Bay. Bulletin of the Geological Survey of Canada Marine Geology of Hudson Strait and Ungava Bay, Eastern Arctic Canada: Late Quarternary Sediments, Depositional Environments, and Late Glacia Deglacial History Derived from Marine Terrestrial Studies n566, 2001. 05(01): p. 147-159.

667. Hargrave, B.T., I.D. Walsh, and D.W. Murray, Seasonal and spatial patterns in mass and organic matter sedimentation in the North Water. Deep-Sea Research Part Ii-Topical Studies in Oceanography, 2002. 49(22-23): p. 5227-5244.

668. Hargreaves, A.L.W.D.P.G.G., Concentrations of 17 elements, including mercury, and their relationship to fitness measures in arctic shorebirds and their eggs. Science of the Total Environment, 2010. 408(16): p. 3153-3161.

669. Hargreaves, S.K., E.J. Horrigan, and R.L. Jefferies, Seasonal partitioning of resource use and constraints on the growth of soil microbes and a forage grass in a grazed Arctic salt-marsh. Plant and Soil, 2009. 322(1-2): p. 279-291.

670. Harington, C.R., The evolution of Arctic marine mammals. Ecological Applications, 2008. 18(2): p. S23-S40.

671. Harland, M.F.J.E.B.S.J.B.D.J., Cretaceous (Albian-Aptian) conifer wood from Northern Hemisphere high latitudes: Forest composition and palaeoclimate. Review of Palaeobotany and Palynology, 2007. 143(3): p. 167-196.

672. Harrington, F.H., Double marking in Arctic Wolves, Canis lupus arctos: Influence of order on posture. Canadian Field-Naturalist, 2006. 120(4): p. 471-473.

673. Harris, J.R., et al., Noise reduction and best band selection techniques for improving classification results using hyperspectral data: application to lithological mapping in Canada's Arctic. Canadian Journal of Remote Sensing, 2006. 32(5): p. 341-354.

674. Harris, J.R., et al., Mapping lithology in Canada's Arctic: application of hyperspectral data using the minimum noise fraction transformation and matched filtering. Canadian Journal of Earth Sciences, 2005. 42(12): p. 2173-2193.

675. Harris, S.A., Thermal history of the Arctic Ocean environs adjacent to North America during the last 3.5 Ma and a possible mechanism for the cause of the cold events (major glaciations and permafrost events). Progress in Physical Geography, 2005. 29(2): p. 218-237.

676. Harry, K. and L. Frink, The Arctic Cooking Pot: Why Was It Adopted ? American Anthropologist, 2009. 111(3): p. 330-343.

677. Harvey, M., J.C. Therriault, and N. Simard, Hydrodynamic control of late summer species composition and abundance of zooplankton in Hudson Bay and Hudson Strait (Canada). Journal of Plankton Research, 2001. 23(5): p. 481-496.

678. Hattori, K.H., et al., Soil geochemical survey over concealed kimberlites in the Attawapiskat area in northern Canada. Geochemistry-Exploration Environment Analysis, 2009. 9: p. 139-150.

679. Hatun, H.E.C.C.R.P.B., Buoyant eddies entering the Labrador Sea observed with gliders and altimetry. Journal of Physical Oceanography, 2007. 37(12): p. 2838-2854.

680. Head, E.J.H., L.R. Harris, and I. Yashayaev, Distributions of Calanus spp. and other mesozooplankton in the Labrador Sea in relation to hydrography in spring and summer (1995-2000). Progress in Oceanography, 2003. 59(1): p. 1-30.

681. Healey, G.K. and L.M. Meadows, Inuit women's health in Nunavut, Canada: a review of the literature. Int J Circumpolar Health, 2007. 66(3): p. 199-214.

682. Heath, J.P., H.G. Gilchrist, and R.C. Ydenberg, Regulation of stroke pattern and swim speed across a range of current velocities: diving by common eiders wintering in polynyas in the Canadian Arctic. Journal of Experimental Biology, 2006. 209(20): p. 3974-3983.

683. Heath, M.R.H.S.J.R.J.B.P.R.I.A.G.A.G.W.S.C.H.S.S.D.H., Comparative ecology of over-wintering Calanus finmarchicus in the northern North Atlantic, and implications for life-cycle patterns. ICES Journal of Marine Science 2004. 61(4): p. 698-708.

684. Heide, J.M.P.L.K.L.G.E.D.R.N.P.R.P.O.J., Resighting of a Narwhal (Monodon monoceros) Instrumented with a Satellite Transmitter. Arctic, 2008. 61(4): p. 395-398.

685. Heide-Jorgensen, M.P., et al., The migratory behaviour of narwhals (Monodon monoceros). Canadian Journal of Zoology-Revue Canadienne De Zoologie, 2003. 81(8): p. 1298-1305.

686. Heide-Jorgensen, M.P. and K. Laidre, Declining extent of open-water refugia for top predators in Baffin Bay and adjacent waters. Ambio, 2004. 33(8): p. 487-494.

687. Heide-Jorgensen, M.P., et al., Dissolving stock discreteness with satellite tracking: Bowhead whales in Baffin Bay. Marine Mammal Science, 2006. 22(1): p. 34-45.

688. Heide-Jorgensen, M.P., et al., An estimate of the fraction of belugas (Delphinapterus leucas) in the Canadian high Arctic that winter in West Greenland. Polar Biology, 2003. 26(5): p. 318-326.

689. Heide-Jorgensen, M.P., H. Stern, and K.L. Laidre, Dynamics of the sea ice edge in Davis Strait. Journal of Marine Systems, 2007. 67(1-2): p. 170-178.

690. Heide-Jorgensen, M.P.J.M.V.S.H.C.H.R.C.L.K.L.W.O.D.L.M.L.D., From Greenland to Canada in ten days: Tracks of bowhead whales, balaena mysticetus, across Baffin Bay. Arctic, 2003. 56(1): p. 21-31.

691. Heimbach, P.C.J.M.H.C.M.D.L.M., On the formulation of sea-ice models. Part 2: Lessons from multi-year adjoint sea-ice export sensitivities through the Canadian Arctic Archipelago. Ocean Modelling, 2010. 33(1): p. 145-158.

692. Heldmann, J.L.M.C.P.P.W.H.A.D.T.T.O.B., Annual development cycle of an icing deposit and associated perennial spring activity on Axel Heiberg Island, Canadian High Arctic. Arctic, Antarctic, and Alpine Research, 2005. 37(1): p. 127-135.

693. Helgason, A., et al., mtDNA variation in Inuit populations of Greenland and Canada: Migration history and population structure. American Journal of Physical Anthropology, 2006. 130(1): p. 123-134.

694. Helm, P.A., et al., Polychlorinated naphthalenes and coplanar polychlorinated biphenyls in beluga whale (Delphinapterus leucas) and ringed seal (Phoca hispida) from the eastern Canadian Arctic. Environmental Pollution, 2002. 119(1): p. 69-78.

695. Helm, P.A.B.T.F.L.H.H.F.P., Seasonal and spatial variation of polychlorinated naphthalenes and non-/mono-ortho-substituted polychlorinated biphenyls in arctic air. Environmental Science and Technology, 2004. 38(21): p. 5514-5521.

696. Henderson, A., Institutional Boundaries and Regionalism: Social, Economic, and Political Regions in the Canadian Arctic. Journal of Canadian Studies-Revue D Etudes Canadiennes, 2009. 43(2): p. 109-136.

697. Hendrickson, C.J., et al., Simultaneous den use by Arctic foxes and wolves at a den site in Nunavut, Canada. Arctic, 2005. 58(4): p. 418-420.

698. Hennessy, T.W., et al., The relationship between in-home water service and the risk of respiratory tract, skin, and gastrointestinal tract infections among rural Alaska natives. Am J Public Health, 2008. 98(11): p. 2072-8.

699. Henriksen, M., et al., Intriguing climatic shifts in a 90 kyr old lake record from northern Russia. Boreas, 2008. 37(1): p. 20-37.

700. Herd, C.D.K., R.C. Peterson, and G.R. Rossman, Violet-colored diopside from southern Baffin Island, Nunavut, Canada. Canadian Mineralogist, 2000. 38: p. 1193-1199.

701. Hermanson, M.H., D.S. Jackson, and G.W. Johnson, History of Inuit community excretion of polychlorinated biphenyls recorded in sewage lake sediments. Chemosphere, 2010. 78(11): p. 1322-1328.

702. Hevesi, A., Észak-Amerika negyedidoszaki vizhálózatának kialakulása Translated Title: Drainage pattern in North America at the end of the Ice Age. Foldrajzi Ertesito, 2007. 56(1): p. 91-104.

703. Hickie, B.E., et al., Development and application of bioaccumulation models to assess persistent organic pollutant temporal trends in arctic ringed seal (Phoca hispida) populations. Science of the Total Environment, 2005. 351: p. 413-426.

704. Hicklin, P.W. and W.R. Barrow, The incidence of embedded shot in waterfowl in Atlantic Canada and Hudson strait. Waterbirds, 2004. 27(1): p. 41-45.

705. Hidiroglou, N., et al., Levels of folate, pyridoxine, niacin and riboflavin in traditional foods of Canadian Arctic Indigenous Peoples. Journal of Food Composition and Analysis, 2008. 21(6): p. 474-480.

706. Higgins, K.L., et al., Phylogenetic relationships, host affinity, and geographic structure of boreal and arctic endophytes from three major plant lineages. Molecular Phylogenetics and Evolution, 2007. 42(2): p. 543-555.

707. Hillaire-Marcel, C. and A. de Vernal, Stable isotope clue to episodic sea ice formation in the glacial North Atlantic. Earth and Planetary Science Letters, 2008. 268(1-2): p. 143-150.

708. Hillaire-Marcel, C., et al., Size-dependent isotopic composition of planktic foraminifers from Chukchi Sea vs. NW Atlantic sediments - implications for the Holocene paleoceanography of the western Arctic. Quaternary Science Reviews, 2004. 23(3-4): p. 245-260.

709. Hilmer, M. and P. Lemke, On the decrease of Arctic sea ice volume. Geophysical Research Letters, 2000. 27(22): p. 3751-3754.

710. Hines, J.E.K.M.F.W.M.O., Aerial surveys of Greater White-fronted Geese Anser albifrons frontalis and other waterfowl in the Rasmussen Lowlands of the Central Canadian Arctic. Wildfowl, 2003. 54: p. 185-201.

711. Hipfner, J.M., A.J. Gaston, and H.G. Gilchrist, Variation in egg size and laying date in Thick-billed Murre populations breeding in the low arctic and high Arctic. Condor, 2005. 107(3): p. 657-664.

712. Hipfner, J.M., A.J. Gaston, and A.E. Storey, Food supply and the consequences of egg size in the Thick-billed Murre. Condor, 2001. 103(2): p. 240-247.

713. Hipfner, J.M., et al., Status of common eiders, Somateria mollissima, nesting in the Digges Sound Region, Nunavut. Canadian Field-Naturalist, 2002. 116(1): p. 22-25.

714. Hirche, H.J. and K. Kosobokova, Early reproduction and development of dominant calanoid copepods in the sea ice zone of the Barents Sea - need for a change of paradigms? Marine Biology, 2003. 143(4): p. 769-781.

715. Hirdman, D.B.J.F.S.H.E.S.S.A.J.A.Q.P.K.S.S.S.J., Long-term trends of black carbon and sulphate aerosol in the Arctic: Changes in atmospheric transport and source region emissions. Atmospheric Chemistry and Physics Discussions, 2010. 10(5): p. 12133-12184.

716. Hobson, K.A., et al., A stable isotope (delta C-13, delta N-15) model for the North Water food web: implications for evaluating trophodynamics and the flow of energy and contaminants. Deep-Sea Research Part Ii-Topical Studies in Oceanography, 2002. 49(22-23): p. 5131-5150.

717. Hocking, W.K., Middle atmosphere dynamical studies at Resolute Bay over a full representative year: Mean winds, tides, and special oscillations. Radio Science, 2001. 36(6): p. 1795-1822.

718. Hodgetts, L.M.R.M.A.P.H.L.M.M.S.M.-B.D., Changing subsistence practices at the Dorset Paleoeskimo site of Phillip's Garden, Newfoundland. Arctic Anthropology, 2003. 40(1): p. 106-120.

719. Hodgins, S., et al., The value of mass screening for chlamydia control in high prevalence communities. Sexually Transmitted Infections, 2002. 78(SUPPL. 1): p. i64-8.

720. Hodgson, R. and K.L. Young, Preferential groundwater flow through a sorted net landscape, Arctic Canada. Earth Surface Processes and Landforms, 2001. 26(3): p. 319-328.

721. Hoekstra, P.F., et al., Concentrations of selected essential and non-essential elements in arctic fox (Alopex lagopus) and wolverines (Gulo gulo) from the Canadian Arctic. Science of the Total Environment, 2003. 309(1-3): p. 81-92.

722. Hoekstra, P.F., et al., Organochlorine contaminant and stable isotope profiles in Arctic fox (Alopex lagopus) from the Alaskan and Canadian Arctic. Environmental Pollution, 2003. 122(3): p. 423-433.

723. Hoekstra, P.F., et al., Profile of persistent chlorinated contaminants, including selected chiral compounds, in wolverine (Gulo gulo) livers from the Canadian Arctic. Chemosphere, 2003. 53(5): p. 551-560.

724. Hoekstra, P.F., et al., Hydroxylated and methylsulfone-containing metabolites of polychlorinated biphenyls in the plasma and blubber of bowhead whales (Balaena mysticetus). Environmental Toxicology and Chemistry, 2003. 22(11): p. 2650-2658.

725. Hogg, I.D. and P.D.N. Hebert, Biological identification of springtails (Hexapoda : Collembola) from the Canadian Arctic, using mitochondrial DNA barcodes. Canadian Journal of Zoology-Revue Canadienne De Zoologie, 2004. 82(5): p. 749-754.

726. Hohbein, M. and J. Cartwright, 3D seismic analysis of the West Shetland Drift system: Implications for Late Neogene palaeoceanography of the NE Atlantic. Marine Geology, 2006. 230(1-2): p. 1-20.

727. Holder, K., R. Montgomerie, and V.L. Friesen, Genetic diversity and management of Nearctic rock ptarmigan (Lagopus mutus). Canadian Journal of Zoology-Revue Canadienne De Zoologie, 2004. 82(4): p. 564-575.

728. Holland, M.M., J. Finnis, and M.C. Serreze, Simulated Arctic Ocean freshwater budgets in the twentieth and twenty-first centuries. Journal of Climate, 2006. 19(23): p. 6221-6242.

729. Holliday, N.P., et al., Retroflection of part of the east Greenland current at Cape Farewell. Geophysical Research Letters, 2007. 34(7).

730. Holliday, N.P.B.S.A.J.M.E.L., Circulation and transport in the western boundary currents at Cape Farewell, Greenland. Journal of Physical Oceanography, 2009. 39(8): p. 1854-1870.

731. Holst, M., I. Stirling, and K.A. Hobson, Diet of ringed seals (Phoca hispida) on the east and west sides of the North Water Polynya, northern Baffin Bay. Marine Mammal Science, 2001. 17(4): p. 888-908.

732. Homoe, P., Otitis media in Greenland. Studies on historical, epidemiological, microbiological, and immunological aspects. Int J Circumpolar Health, 2001. 60 Suppl 2: p. 1-54.

733. Homoe, P., R.B. Christensen, and P. Bretlau, Acute otitis media and season of birth. International Journal of Pediatric Otorhinolaryngology, 2005. 69(4): p. 487-491.

734. Honninger, G., et al., Ground-based measurements of halogen oxides at the Hudson Bay by active longpath DOAS and passive MAX-DOAS. Geophysical Research Letters, 2004. 31(4).

735. Honninger, G. and U. Platt, Observations of BrO and its vertical distribution during surface ozone depletion at Alert. Atmospheric Environment, 2002. 36(15-16): p. 2481-2489.

736. Hooker, S.K.W.H.M.T.L.M.C.D.A.C.M.W.J.Y.M.M.J., Changes in persistent contaminant concentration and CYP1A1 protein expression in biopsy samples from northern bottlenose whales, Hyperoodon ampullatus, following the onset of nearby oil and gas development. Environmental Pollution, 2008. 152(1): p. 205-216.

737. Hoover, A.K.D.D.L.D.K.W., Survival and nesting success of the Pacific Eider (Somateria mollissima v-nigrum) near Bathurst Inlet, Nunavut. Canadian Journal of Zoology, 2010. 88(6): p. 511-519.

738. Hopkins, S.E., et al., Keeping busy: a Yup'ik/Cup'ik perspective on health and aging. Int J Circumpolar Health, 2007. 66(1): p. 42-50.

739. Houd, S., J. Qinuajuak, and B. Epoo, The outcome of perinatal care in Inukjuak, Nunavik, Canada 1998-2002. International Journal of Circumpolar Health, 2004. 63(SUPPL. 2 ): p. 239-241.

740. Houdier, S., et al., Acetaldehyde and acetone in the Arctic snowpack during the ALERT2000 campaign. Snowpack composition, incorporation processes and atmospheric impact. Atmospheric Environment, 2002. 36(15-16): p. 2609-2618.

741. Houze, S., et al., TRICHINELLOSIS ACQUIRED IN NUNAVUT, CANADA IN SEPTEMBER 2009: MEAT FROM GRIZZLY BEAR SUSPECTED. Eurosurveillance, 2009. 14(44): p. 22-23.

742. Howell, S.E.L.T.A.Y.J.J.M.S., Multi-year sea-ice conditions in the western Canadian Arctic Archipelago region of the Northwest Passage: 1968-2006. Atmosphere Ocean, 2008. 46(2): p. 229-242.

743. Howse, L., Late Dorset Caribou Hunters: Zooarchaeology of the Bell Site, Victoria Island. Arctic Anthropology, 2008. 45(1): p. 22-40.

744. Hu, A., G.A. Meehl, and W.Q. Han, Causes of a fresher, colder northern North Atlantic in late 20th century in a coupled model. Progress in Oceanography, 2007. 73(3-4): p. 384-405.

745. Hu, A.X., et al., Response of the Atlantic thermohaline circulation to increased atmospheric CO2 in a coupled model. Journal of Climate, 2004. 17(21): p. 4267-4279.

746. Huang, L., et al., A trajectory analysis of atmospheric transport of black carbon aerosols to Canadian high Arctic in winter and spring (1990-2005). Atmospheric Chemistry and Physics, 2010. 10(11): p. 5065-5073.

747. Hughen, K.A., J.T. Overpeck, and R.F. Anderson, Recent warming in a 500-year palaeotemperature record from varved sediments, Upper Soper Lake, Baffin Island, Canada. Holocene, 2000. 10(1): p. 9-19.

748. Hughes, J., et al., Is there a cost of parasites to caribou? Parasitology, 2009. 136(2): p. 253-265.

749. Hung, H., et al., Temporal and spatial variabilities of atmospheric polychlorinated biphenyls (PCBs), organochlorine (OC) pesticides and polycyclic aromatic hydrocarbons (PAHs) in the Canadian Arctic: Results from a decade of monitoring. Science of the Total Environment, 2005. 342(1-3): p. 119-144.

750. Hung, H., et al., Measurement of particle-bound polychlorinated dibenzo-p-dioxins and dibenzofurans (PCDD/Fs) in Arctic air at Alert, Nunavut, Canada. Atmospheric Environment, 2002. 36(6): p. 1041-1050.

751. Hung, H., et al., Temporal trends of organochlorine pesticides in the Canadian Arctic atmosphere. Environmental Science & Technology, 2002. 36(5): p. 862-868.

752. Hunter, S.W.D.R.E.S.D.A.V.B.S.L.E.N.M.I., Deep western boundary current dynamics and associated sedimentation on the Eirik Drift, Southern Greenland Margin. Deep Sea Research Part I: Oceanographic Research Papers, 2007. 54(12): p. 2036-2066.

753. Huss, M., et al., Temporal and spatial changes of Laika Glacier, Canadian Arctic, since 1959, inferred from satellite remote sensing and mass-balance modelling. Journal of Glaciology, 2008. 54(188): p. 857-866.

754. Hutchison, J.H. and C.R. Harington, A peculiar new fossil shrew (Lipotyphla, Soricidae) from the High Arctic of Canada. Canadian Journal of Earth Sciences, 2002. 39(4): p. 439-443.

755. Iannicelli, M., Devon Island's oriented landforms as an analog to Illinois-type paha. Polar Geography, 2003. 27(4): p. 339-350.

756. Ianniello, A., et al., Denuder measurements of gas and aerosol species above Arctic snow surfaces at Alert 2000. Atmospheric Environment, 2002. 36(34): p. 5299-5309.

757. Ilyash, L.V. and L.S. Zhitina, Comparative analysis of sea-ice diatom species composition in the seas of Russian Arctic. Zhurnal Obshchei Biologii, 2009. 70(2): p. 143-154.

758. Imbert, E. and G. Houle, Persistence of colonizing plant species along an inferred successional sequence on a subarctic coastal dune (Quebec, Canada). Ecoscience, 2000. 7(3): p. 370-378.

759. Ingram, R.G., et al., An overview of physical processes in the North Water. Deep-Sea Research Part Ii-Topical Studies in Oceanography, 2002. 49(22-23): p. 4893-4906.

760. Inoue, J.C.J.A., Application of Aerosondes to high-resolution observations of sea surface temperature over Barrow Canyon. Geophysical Research Letters, 2004. 31(14): p. 1-4.

761. Irvine-Fynn, T.D.L.M.B.J.S.D.B.W.F.S.A.W.J.L.M.W.I.C.H.A., Geocryological processes linked to High Arctic proglacial stream suspended sediment dynamics: Examples from Bylot Island, Nunavut, and Spitsbergen, Svalbard. Hydrological Processes Canadian Geophysical Union Hydrology Section, 2005. 19(1): p. 115-135.

762. Irvine-Fynn, T.D.L.W.J.L.M.W.F.S.A.M.B.J., Seasonal changes in ground-penetrating radar signature observed at a polythermal glacier, Bylots Island, Canada. Earth Surface Processes and Landforms, 2006. 31(7): p. 892-909.

763. Itaki, T. and B.K. Khim, Radiolarians from the British North-Polar Expedition (1875-1876): re-examination of the H.B. Brady (1878) collection. Journal of Natural History, 2007. 41(37-40): p. 2537-2542.

764. Jackson, H.R.H.T.N.S.P.K.B.T., Seismic reflection profiles from kane to hall basin, Nares Strait: Evidence for faulting. Polarforschung, 2004. 74(1): p. 21-39.

765. Jackson, M.P.A. and J.C. Harrison, An allochthonous salt canopy on Axel Heiberg Island, Sverdrup Basin, Arctic Canada. Geology, 2006. 34(12): p. 1045-1048.

766. Jackson, T.A., D.C.G. Muir, and W.F. Vincent, Historical variations in the stable isotope composition of mercury in Arctic lake sediments. Environmental Science & Technology, 2004. 38(10): p. 2813-2821.

767. Jacobson, J.L., et al., Beneficial effects of a polyunsaturated fatty acid on infant development: Evidence from the Inuit of arctic Quebec. Journal of Pediatrics, 2008. 152(3): p. 356-364.

768. Jadin, E.A. and Y.A. Zyulyaeva, Interannual variations in the total ozone, stratospheric dynamics, extratropical SST anomalies and predictions of abnormal winters in Eurasia. International Journal of Remote Sensing, 2010. 31(4): p. 851-866.

769. Jadin, E.A., Y.A. Zyulyaeva, and E.M. Volodin, Relationships between Interannual Variations in Stratospheric Warmings, Tropospheric Circulation, and Sea Surface Temperature in the Northern Hemisphere. Izvestiya Atmospheric and Oceanic Physics, 2008. 44(5): p. 594-605.

770. Jahren, A.H., The Arctic forest of the middle Eocene. Annual Review of Earth and Planetary Sciences, 2007. 35: p. 509-540.

771. Jahren, A.H. and L.S.L. Sternberg, Humidity estimate for the middle Eocene Arctic rain forest. Geology, 2003. 31(5): p. 463-466.

772. Jahren, A.H.B.M.C.S.R.E.G.H.V.S.L.S.L., The environmental water of the middle Eocene Arctic: Evidence from &#x03B4;D, &#x03B4;18O and &#x03B4;13C within specific compounds. Palaeogeography, Palaeoclimatology, Palaeoecology, 2009. 271(1): p. 96-103.

773. James, S., et al., Meeting the needs of Nunavut families: a community-based midwifery education program. Rural Remote Health, 2010. 10(2): p. 1355.

774. Jamieson, J.A. and H.V. Kuhnlein, The paradox of anemia with high meat intake: a review of the multifactorial etiology of anemia in the Inuit of North America. Nutrition Reviews, 2008. 66(5): p. 256-271.

775. Jansson, K.N., J. Kleman, and D.R. Marchant, The succession of ice-flow patterns in north-central Quebec-Labrador, Canada. Quaternary Science Reviews, 2002. 21(4-6): p. 503-523.

776. Jantunen, L.M., et al., Hexachlorocyclohexanes (HCHs) in the Canadian archipelago. 2. Air-water gas exchange of alpha- and gamma-HCH. Environmental Science & Technology, 2008. 42(2): p. 465-470.

777. Jarvis, R.L.B.R.G., Incubation behaviour of Richardson's Canada Geese on Victoria Island, Nunavut, Canada. Occasional Paper of the Canadian Wildlife Service Towards conservation of the diversity of Canada Geese, 2000. 12(01): p. 59-66.

778. Jefferies, R.L. and R.H. Drent, Arctic geese, migratory connectivity and agricultural change: calling the sorcerer's apprentice to order. Ardea, 2006. 94(3): p. 537-554.

779. Jefferies, R.L. and K.A. Edwards, Soluble carbohydrate content of shoots of Arctic wetland plants that are consumed by lesser snow geese. Botany-Botanique, 2008. 86(9): p. 995-1001.

780. Jefferies, R.L., A.P. Jano, and K.F. Abraham, A biotic agent promotes large-scale catastrophic change in the coastal marshes of Hudson Bay. Journal of Ecology, 2006. 94(1): p. 234-242.

781. Jeffries, M.O., Ellesmere Island ice shelves and ice islands. US Geological Survey Professional Paper n1386 J, 1386. 12(01): p. J147-J164.

782. Jenkins, A.L., et al., An overview of factors influencing the health of Canadian Inuit infants. Int J Circumpolar Health, 2003. 62(1): p. 17-39.

783. Jennings, A.E., et al., A mid-Holocene shift in Arctic sea-ice variability on the East Greenland Shelf. Holocene, 2002. 12(1): p. 49-58.

784. Jennings, A.E.V.G.D.B.S.A.W.N., Foramineral biostratigraphy and paleoceanography. Bulletin of the Geological Survey of Canada Marine Geology of Hudson Strait and Ungava Bay, Eastern Arctic Canada: Late Quarternary Sediments, Depositional Environments, and Late Glacia Deglacial History Derived from Marine Terrestrial Studies n566, 2001. 05(01): p. 127-146.

785. Jin, X., D. Barber, and T. Papakyriakou, A new clear-sky downward longwave radiative flux parameterization for Arctic areas based on rawinsonde data. Journal of Geophysical Research-Atmospheres, 2006. 111(D24).

786. Johansen, P., et al., Accumulation of cadmium in livers and kidneys in Greenlanders. Science of the Total Environment, 2006. 372(1): p. 58-63.

787. Johnson, J.S., et al., Dietary intake of Alaska Native people in two regions and implications for health: the Alaska Native Dietary and Subsistence Food Assessment Project. Int J Circumpolar Health, 2009. 68(2): p. 109-22.

788. Johnson, J.S., et al., Developing a validated Alaska Native food frequency questionnaire for western Alaska, 2002-2006. Int J Circumpolar Health, 2009. 68(2): p. 99-108.

789. Johnson, K.E., et al., Effects of local point source polychlorinated biphenyl (PCB) contamination on bone mineral density in deer mice (Peromyscus maniculatus). Science of the Total Environment, 2009. 407(18): p. 5050-5055.

790. Johnson, K.P., et al., Investigation of the deposition and emission of mercury in arctic snow during an atmospheric mercury depletion event. Journal of Geophysical Research-Atmospheres, 2008. 113(D17).

791. Johnson-Down, L. and G.M. Egeland, Adequate Nutrient Intakes Are Associated with Traditional Food Consumption in Nunavut Inuit Children Aged 3-5 Years. Journal of Nutrition, 2010. 140(7): p. 1311-1316.

792. Johnston, M., A comparison of physical properties and strength of decaying first-year ice in the Arctic and sub-Arctic. Annals of Glaciology 2006. 44: p. 154-162.

793. Johnston, V.H.G.-T.C.L.P.S.T., Assessment of bird populations in the Rasmussen Lowlands, Nunavut. Occasional Paper of the Canadian Wildlife Service Assessment of bird populations in the Rasmussen Lowlands, Nunavut n101, 2000. 06(07): p. 1-56.

794. Jones, E.L., Dietary evenness, prey choice, and human-environment interactions. Journal of Archaeological Science, 2004. 31(3): p. 307-317.

795. Jones, E.P., et al., Tracing Pacific water in the North Atlantic Ocean. Journal of Geophysical Research-Oceans, 2003. 108(C4).

796. Jones, H.G., Teaching the explorers: Some inuit contributions to Arctic discoveries. Polar Geography, 2002. 26(1): p. 4-20.

797. Jones, I.L., et al., Different patterns of parental effort during chick-rearing by female and male Thick-Billed Murres (Uria lomvia) at a low-arctic colony. Auk, 2002. 119(4): p. 1064-1074.

798. Jones, M.K. and P.J. Noble, Sheinwoodian (Uppermost Lower Silurian) radiolaria from the Cape Phillips Formation, Nunavut, Canada. Micropaleontology, 2006. 52(4): p. 289-315.

799. Jones, S.F., et al., Impact of magmatism on petroleum systems in the Sverdrup Basin, Canadian Arctic Islands, Nunavut: A numerical modelling study. Journal of Petroleum Geology, 2007. 30(3): p. 237-255.

800. Jones, V.J. and H.J.B. Birks, Lake-sediment records of recent environmental change on Svalbard: results of diatom analysis. Journal of Paleolimnology, 2004. 31(4): p. 445-466.

801. Jonsson, J.E., A.D. Afton, and R.T. Alisauskas, Does body size influence nest attendance? A comparison of Ross's geese (Chen rossii) and the larger, sympatric lesser snow geese (C-caerulescens caerulescens). Journal of Ornithology, 2007. 148(4): p. 549-555.

802. Jorgensen, M.E., et al., Twenty-four-hour blood pressure among Greenlanders and Danes: relationship to diet and lifestyle. Scandinavian Journal of Clinical & Laboratory Investigation, 2002. 62(6): p. 413-422.

803. Jorgensen, O.A., et al., Identification and mapping of bottom fish assemblages in Davis Strait and southern Baffin Bay. Canadian Journal of Fisheries and Aquatic Sciences, 2005. 62(8): p. 1833-1852.

804. Joyce, T.M. and A. Proshutinsky, Greenland's Island Rule and the Arctic Ocean circulation. Journal of Marine Research, 2007. 65(5): p. 639-653.

805. Joynt, E.H. and A.P. Wolfe, Paleoenvironmental inference models from sediment diatom assemblages in Baffin Island lakes (Nunavut, Canada) and reconstruction of summer water temperature. Canadian Journal of Fisheries and Aquatic Sciences, 2001. 58(6): p. 1222-1243.

806. Juck, D., et al., Polyphasic microbial community analysis of petroleum hydrocarbon-contaminated soils from two northern Canadian communities. FEMS Microbiology Ecology, 2000. 33(3): p. 241-249.

807. Jung, T., et al., Sensitivity of extratropical cyclone characteristics to horizontal resolution in the ECMWF model. Quarterly Journal of the Royal Meteorological Society, 2006. 132(619): p. 1839-1857.

808. Jung, T. and P.B. Rhines, Greenland's pressure drag and the Atlantic storm track. Journal of the Atmospheric Sciences, 2007. 64(11): p. 4004-4030.

809. Jung, W.Y.V.P.R., Treitel Ridge: A unique inside corner hogback on the west flank of extinct Aegir spreading ridge, Norway basin. Marine Geology, 2009. 267(1): p. 86-100.

810. Jungclaus, J.H., et al., Arctic-North Atlantic interactions and multidecadal variability of the meridional overturning circulation. Journal of Climate, 2005. 18(19): p. 4013-4031.

811. Jurgens, J.A.B.R.A.F.T.R., Fungal diversity and deterioration in mummified woods from the ad Astra Ice Cap region in the Canadian High Arctic. Polar Biology, 2009. 32(5): p. 751-758.

812. Kagan, B.A. and E.V. Sofina, Ice-induced seasonal variability of tidal constants in the Arctic Ocean. Continental Shelf Research, 2010. 30(6): p. 643-647.

813. Kah, L.C. and R. Riding, Mesoproterozoic carbon dioxide levels inferred from calcified cyanobacteria. Geology, 2007. 35(9): p. 799-802.

814. Kalinovich, I., et al., Remediation of PCB contaminated soils in the Canadian Arctic: Excavation and surface PRB technology. Science of the Total Environment, 2008. 407(1): p. 53-66.

815. Kaminski, M.A., L. Silye, and S. Kender, Miocene deep-water agglutinated Foraminifera from ODP Hole 909c: Implications for the paleoceanography of the Fram Strait Area, Greenland Sea. Micropaleontology, 2005. 51(5): p. 373-403.

816. Kaplan, M.R. and G.H. Miller, Early Holocene delevelling and deglaciation of the Cumberland Sound region, Baffin Island, Arctic Canada. Geological Society of America Bulletin, 2003. 115(4): p. 445-462.

817. Kaplan, M.R., G.H. Miller, and E.J. Steig, Low-gradient outlet glaciers lice streams?) drained the Laurentide ice sheet. Geology, 2001. 29(4): p. 343-346.

818. Kaplan, M.R., A.P. Wolfe, and G.H. Miller, Holocene environmental variability in southern Greenland inferred from lake sediments. Quaternary Research, 2002. 58(2): p. 149-159.

819. Kaplan, S.A.W.J.M., Challenges and choices: Exploring the interplay of climate, history, and culture on Canada's Labrador coast. Arctic, Antarctic, and Alpine Research, 2000. 32(3): p. 351-359.

820. Karnovsky, N.J., et al., Distribution and Diet of Ivory Gulls (Pagophila eburnea) in the North Water Polynya. Arctic, 2009. 62(1): p. 65-74.

821. Karnovsky, N.J., et al., Seasonal changes in diets of seabirds in the North Water Polynya: a multiple-indicator approach. Marine Ecology-Progress Series, 2008. 357: p. 291-299.

822. Karstensen, J.A.T.F.J.S.U., Subsurface temperature maxima in the Labrador Sea and the subpolar North Atlantic. Geophysical Research Letters, 2006. 33(21).

823. Kashino, Y.H.Y.S.K.K.S.O.T.H.T.F.M.S.Y., Strategies of phytoplankton to perform effective photosynthesis in the North Water. Deep Sea Research Part II: Topical Studies in Oceanography, 2002. 49(22): p. 5049-5061.

824. Kasper, J.N. and M. Allard, Late-Holocene climatic changes as detected by the growth and decay of ice wedges on the southern shore of Hudson Strait, northern Quebec, Canada. Holocene, 2001. 11(5): p. 563-577.

825. Katsuki, K., et al., Living diatoms in the vicninity of the North Pole, summer 2004. Micropaleontology, 2009. 55(2-3): p. 137-170.

826. Kaufman, D.S., et al., Holocene thermal maximum in the western Arctic (0-180 degrees W). Quaternary Science Reviews, 2004. 23(5-6): p. 529-560.

827. Keatley, B., et al., Impacts of seabird-derived nutrients on water quality and diatom assemblages from Cape Vera, Devon Island, Canadian High Arctic. Hydrobiologia, 2009. 621: p. 191-205.

828. Keatley, B.E., M.S.V. Douglas, and J.P. Smol, Early-20th century environmental changes inferred using subfossil diatoms from a small pond on Melville Island, NWT, Canadian high Arctic. Hydrobiologia, 2006. 553: p. 15-26.

829. Keatley, B.E., M.S.V. Douglas, and J.P. Smol, Limnological characteristics of a high arctic oasis and comparisons across northern Ellesmere Island. Arctic, 2007. 60(3): p. 294-308.

830. Keatley, B.E., M.S.V. Douglas, and J.P. Smol, Physical and chemical limnological characteristics of lakes and ponds across environmental gradients on Melville Island, Nunavut/NWT, High Arctic Canada. Fundamental and Applied Limnology, 2007. 168(4): p. 355-376.

831. Keatley, B.E., M.S.V. Douglas, and J.P. Smol, Prolonged ice cover dampens diatom community responses to recent climatic change in High Arctic lakes. Arctic Antarctic and Alpine Research, 2008. 40(2): p. 364-372.

832. Keatley, B.E., M.S.V. Douglas, and J.P. Smol, Evaluating the influence of environmental and spatial variables on diatom species distributions from Melville Island (Canadian High Arctic). Botany-Botanique, 2008. 86(1): p. 76-90.

833. Keigwin, L.D., J.P. Sachs, and Y. Rosenthal, A 1600-year history of the Labrador Current off Nova Scotia. Climate Dynamics, 2003. 21(1): p. 53-62.

834. Kellett, D.K., R.T. Alisauskas, and K.R. Mehl, Nest-site selection, interspecific associations, and nest success of King Eiders. Condor, 2003. 105(2): p. 373-378.

835. Kelly, B.C. and F. Gobas, An arctic terrestrial food-chain bioaccumulation model for persistent organic pollutants. Environmental Science & Technology, 2003. 37(13): p. 2966-2974.

836. Kelly, B.C., et al., Perfluoroalkyl Contaminants in an Arctic Marine Food Web: Trophic Magnification and Wildlife Exposure. Environmental Science & Technology, 2009. 43(11): p. 4037-4043.

837. Kelly, J., et al., Cancer among the circumpolar Inuit, 1989-2003. I. Background and methods. Int J Circumpolar Health, 2008. 67(5): p. 396-407.

838. Kelly, J., et al., CANCER AMONG THE CIRCUMPOLAR INUIT 1989-2003 II. PATTERNS AND TRENDS. International Journal of Circumpolar Health, 2008. 67(5): p. 408-420.

839. Kelly, M.A., et al., A Be-10 chronology of lateglacial and Holocene mountain glaciation in the Scoresby Sund region, east Greenland: implications for seasonality during lateglacial time. Quaternary Science Reviews, 2008. 27(25-26): p. 2273-2282.

840. Kendrick, A., P.O.B. Lyver, and N. Lutsel Ke Dene First, Denesoline (Chipewyan) knowledge of barren-ground caribou (Rangifer tarandus groenlandicus) movements. Arctic, 2005. 58(2): p. 175-191.

841. Kendrick, A. and M. Manseau, Representing traditional knowledge: Resource management and inuit knowledge of bairren-ground cairlbou. Society & Natural Resources, 2008. 21(5): p. 404-418.

842. Kerbes, R.H., et al., Lesser Snow Geese, Chen caerulescens caerulescens, and Ross's Geese, Chen rossii, of Jenny Lind Island, Nunavut. Canadian Field-Naturalist, 2008. 122(1): p. 34-39.

843. Kerwin, M.W., et al., Pollen-based summer temperature reconstructions for the eastern Canadian boreal forest, subarctic, and Arctic. Quaternary Science Reviews, 2004. 23(18-19): p. 1901-1924.

844. Kerzenmacher, T.E., et al., Measurements of O-3, NO2 and temperature during the 2004 Canadian Arctic ACE Validation Campaign. Geophysical Research Letters, 2005. 32(16).

845. Kim, J.H.C.H.K.Y.C.H.G., Macroalgal flora of Kongsfjorden in Svalbard Islands, the Arctic. Ocean and Polar Research, 2003. 25(4): p. 569-591.

846. Kingsley, M.C.S.G.S.S.G.A., Movements and dive behaviour of belugas in northern Quebec. Arctic, 2001. 54(3): p. 262-275.

847. Kingwatsiaq, N.P.K., Healing the body and the soul through visualization: A technique used by the community Healing Team of Cape Dorset, Nunavut. Arctic Anthropology, 2003. 40(2): p. 90-92.

848. Kinnard, C., et al., Stratigraphic analysis of an ice core from the Prince of Wales Icefield, Ellesmere Island, Arctic Canada, using digital image analysis: High-resolution density, past summer warmth reconstruction, and melt effect on ice core solid conductivity. Journal of Geophysical Research-Atmospheres, 2008. 113.

849. Kinnard, C.Z.C.M.F.D.A.W.C.P., Calibration of an ice-core glaciochemical (sea-salt) record with sea-ice variability in the Canadian Arctic. Annals of Glaciology 2006. 44: p. 383-390.

850. Kinnard, C.Z.C.M.F.D.A.A.B.M.S., Climatic analysis of sea-ice variability in the Canadian Arctic from operational charts, 1980-2004. Annals of Glaciology, 2006. 44: p. 391-402.

851. Kirk, J.L. and V.L.S. Louis, Multiyear Total and Methyl Mercury Exports from Two Major Sub-Arctic Rivers Draining into Hudson Bay, Canada. Environmental Science & Technology, 2009. 43(7): p. 2254-2261.

852. Kirk, J.L., et al., Methylated Mercury Species in Marine Waters of the Canadian High and Sub Arctic. Environmental Science & Technology, 2008. 42(22): p. 8367-8373.

853. Kirk, J.L., V.L.S. Louis, and M.J. Sharp, Rapid reduction and reemission of mercury deposited into snowpacks during atmospheric mercury depletion events at Churchill, Manitoba, Canada. Environmental Science & Technology, 2006. 40(24): p. 7590-7596.

854. Kirkland, C.L., J.S. Daly, and M.J. Whitehouse, Provenance and terrane evolution of the Kalak Nappe Complex, Norwegian Caledonides: Implications for neoproterozoic paleogeography and tectonics. Journal of Geology, 2007. 115(1): p. 21-41.

855. Kishigami, N., A new typology of food-sharing practices among hunter-gatherers, with a special focus on inuit examples. Journal of Anthropological Research, 2004. 60(3): p. 341-358.

856. Kitson, J.C., Harvest rate of sooty shearwaters (Puffinus griseus) by Rakiura Maori: a potential tool to monitor population trends? Wildlife Research, 2004. 31(3): p. 319-325.

857. Kjaer, K.G., Where have all the barque rigged sealers gone? Polar Record, 2008. 44(3): p. 265-275.

858. Kjaer, K.G. and M. Sefland, The Arctic ship Polarbjorn. Polar Record, 2006. 42(220): p. 51-57.

859. Kjellen, N., Skuas on the Canadian tundra in 1999: Relative occurrence of species, ages and colour phases. Ornis Svecica, 2000. 10(2): p. 71-78.

860. Kleiber, H.P., J. Knies, and F. Niessen, The Late Weichselian glaciation of the Franz Victoria Trough, northern Barents Sea: ice sheet extent and timing. Marine Geology, 2000. 168(1-4): p. 25-44.

861. Kleman, J.M.D.B.I., Geomorphic evidence for late glacial ice dynamics on southern Baffin Island and in outer Hudson Strait, Nunavut, Canada. Arctic, Antarctic, and Alpine Research, 2001. 33(3): p. 249-257.

862. Kleman, J.S.A.P.F.J., Geologically and geomorphologically constrained numerical model of Laurentide Ice Sheet inception and build-up. Quaternary International Inceptions: Mechanisms, patterns and timing of ice sheet inception, 2002. 95: p. 87-98.

863. Kliem, N. and D.A. Greenberg, Diagnostic simulations of the summer circulation in the Canadian Arctic Archipelago. Atmosphere-Ocean, 2003. 41(4): p. 273-289.

864. Knudsen, K.L., et al., Deglacial and Holocene conditions in northernmost Baffin Bay: sediments, foraminifera, diatoms and stable isotopes. Boreas, 2008. 37(3): p. 346-376.

865. Knudsen, S.W. and P.R. Moller, Careproctus kidoi, a new Arctic species of snailfish (Teleostei : Liparidae) from Baffin Bay. Ichthyological Research, 2008. 55(2): p. 175-182.

866. Koch, A., et al., Seroprevalence and risk factors for Helicobacter pylori infection in Greenlanders. Helicobacter, 2005. 10(5): p. 433-442.

867. Koch, I., et al., Distinguishing between naturally and anthropogenically elevated arsenic at an abandoned arctic military site. Environmental Forensics, 2005. 6(4): p. 335-344.

868. Koenigk, T. and U. Mikolajewicz, Seasonal to interannual climate predictability in mid and high northern latitudes in a global coupled model. Climate Dynamics, 2009. 32(6): p. 783-798.

869. Koenigk, T., et al., Variability of Fram Strait sea ice export: causes, impacts and feedbacks in a coupled climate model. Climate Dynamics, 2006. 26(1): p. 17-34.

870. Koenigk, T., et al., Arctic freshwater export in the 20th and 21st centuries. Journal of Geophysical Research-Biogeosciences, 2007. 112(G4).

871. Koerner, R.M., Mass balance of glaciers in the Queen Elizabeth Islands, Nunavut, Canada. Annals of Glaciology, 2005. 42: p. 417-423.

872. Koie, M., et al., The parasite fauna of Arctogadus glacialis (Peters) (Gadidae) from western and eastern Greenland. Polar Biology, 2008. 31(9): p. 1017-1021.

873. Koldkjaer, O.G., L. Wermuth, and P. Bjerregaard, Parkinson's disease among Inuit in Greenland: organochlorines as risk factors. Int J Circumpolar Health, 2004. 63 Suppl 2: p. 366-8.

874. Kolstad, E.W., T.J. Bracegirdle, and I.A. Seierstad, Marine cold-air outbreaks in the North Atlantic: temporal distribution and associations with large-scale atmospheric circulation. Climate Dynamics, 2009. 33(2-3): p. 187-197.

875. Komuro, Y. and H. Hasumi, Intensification of the Atlantic deep circulation by the Canadian Archipelago throughflow. Journal of Physical Oceanography, 2005. 35(5): p. 775-789.

876. Korobova, E.M., et al., 137Cs and 40K in the terrestrial vegetation of the Yenisey Estuary: landscape, soil and plant relationships. J Environ Radioact, 2007. 96(1-3): p. 144-56.

877. Korsun, S. and M. Hald, Seasonal dynamics of benthic Foraminifera in a glacially fed fjord of Svalbard, European Arctic. Journal of Foraminiferal Research, 2000. 30(4): p. 251-271.

878. Kortzinger, A.W.D.W.R.S.U.K.J.d.G.M., Seasonal cycle of O2 and pCO2 in the central Labrador Sea: Atmospheric, biological, and physical implications. Global Biogeochemical Cycles, 2008. 22(1).

879. Kosobokova, K.N. and H.J. Hirche, Reproduction of Calanus glacialis in the Laptev Sea, Arctic Ocean. Polar Biology, 2001. 24(1): p. 33-43.

880. Kotyk, M.E., et al., Morphologically complex plant macrofossils from the Late Silurian of Arctic Canada. American Journal of Botany, 2002. 89(6): p. 1004-1013.

881. Kovesi, T., et al., Heat recovery ventilators prevent respiratory disorders in Inuit children. Indoor Air, 2009. 19(6): p. 489-499.

882. Krachler, M.Z.J.S.W.F.D., Atmospheric Sb in the Arctic during the past 16,000 years: Responses to climate change and human impacts. Global Biogeochemical Cycles, 2008. 22(1).

883. Krafft, B.A., et al., Growth and population parameters of ringed seals (Pusa hispida) from Svalbard, Norway, 2002-2004. Ices Journal of Marine Science, 2006. 63(6): p. 1136-1144.

884. Kramers, E., The atlas of Canada's revised circumpolar map. Association of Canadian Map Libraries and Archives Bulletin n132, 2008. 03(01).

885. Krarup, H.B., et al., Benign course of long-standing hepatitis B virus infection among Greenland Inuit? Scandinavian Journal of Gastroenterology, 2008. 43(3): p. 334-343.

886. Krause, T.G., et al., Atopic sensitization among children in an Arctic environment. Clinical and Experimental Allergy, 2002. 32(3): p. 367-372.

887. Krembs, C., T. Mock, and R. Gradinger, A mesocosm study of physical-biological interactions in artificial sea ice: effects of brine channel surface evolution and brine movement on algal biomass. Polar Biology, 2001. 24(5): p. 356-364.

888. Kruger, T., et al., Xenohormone transactivities are inversely associated to serum POPs in Inuit. Environ Health, 2008. 7: p. 38.

889. Krummel, E.M., The Circumpolar Inuit Health Summit: a summary. Int J Circumpolar Health, 2009. 68(5): p. 509-18.

890. Kryjov, V.N., Searching for circulation patterns affecting North Europe annual temperature. Atmospheric Science Letters, 2003. 5(1): p. 23-34.

891. Kuhnein, H.V., et al., Vitamins A, D, and E in Canadian arctic traditional food and adult diets. Journal of Food Composition and Analysis, 2006. 19(6-7): p. 495-506.

892. Kuhnlein, H.V., et al., Macronutrient, mineral and fatty acid composition of Canadian Arctic traditional food. Journal of Food Composition and Analysis, 2002. 15(5): p. 545-566.

893. Kuhnlein, H.V., et al., Arctic indigenous peoples experience the nutrition transition with changing dietary patterns and obesity. J Nutr, 2004. 134(6): p. 1447-53.

894. Kuijpers, A., et al., Giant iceberg plow marks at more than 1 km water depth offshore West Greenland. Marine Geology, 2007. 246(1): p. 60-64.

895. Kuipers, B., W.R. Cullen, and W.W. Mohn, Reductive dechlorination of weathered Aroclor 1260 during anaerobic biotreatment of Arctic soils. Canadian Journal of Microbiology, 2003. 49(1): p. 9-14.

896. Kunimoto, D., et al., Investigation of tuberculosis transmission in Canadian Arctic Inuit Communities using DNA fingerprinting. International Journal of Tuberculosis and Lung Disease, 2001. 5(7): p. 642-647.

897. Kutz, S., et al., Muskox lungworm (Umingmakstrongylus pallikuukensis) does not establish in experimentally exposed thinhorn sheep (Ovis dalli). Journal of Wildlife Diseases, 2004. 40(2): p. 197-204.

898. Kutz, S.J., et al., Serendipitous discovery of a novel protostrongylid (Nematoda : Metastrongyloidea) in caribou, muskoxen, and moose from high latitudes of North America based on DNA sequence comparisons. Canadian Journal of Zoology-Revue Canadienne De Zoologie, 2007. 85(11): p. 1143-1156.

899. Kutz, S.J., et al., Prevalence of Toxoplasma gondii antibodies in barren-ground caribou (Rangifer tarandus groenlandicus) from the Canadian Arctic. Journal of Parasitology, 2001. 87(2): p. 439-442.

900. Kuzyk, Z.A., et al., Biological responses to PCB exposure in shorthorn sculpin from Saglek Bay, Labrador. Science of the Total Environment, 2005. 351: p. 285-300.

901. Kuzyk, Z.A., et al., Sea ice, hydrological, and biological processes in the Churchill River estuary region, Hudson Bay. Estuarine Coastal and Shelf Science, 2008. 77(3): p. 369-384.

902. Kuzyk, Z.A., et al., PCBs in sediments and the coastal food web near a local contaminant source in Saglek Bay, Labrador. Science of the Total Environment, 2005. 351: p. 264-284.

903. Kuzyk, Z.Z.A., et al., Sources, pathways and sinks of particulate organic matter in Hudson Bay: Evidence from lignin distributions. Marine Chemistry, 2008. 112(3-4): p. 215-229.

904. Kuzyk, Z.Z.A., et al., Towards a sediment and organic carbon budget for Hudson Bay. Marine Geology, 2009. 264(3-4): p. 190-208.

905. Kuzyk, Z.Z.A., et al., Elemental and stable isotopic constraints on river influence and patterns of nitrogen cycling and biological productivity in Hudson Bay. Continental Shelf Research, 2010. 30(2): p. 163-176.

906. Kvamsto, N.G., P. Skeie, and D.B. Stephenson, Impact of labrador sea-ice extent on the North Atlantic oscillation. International Journal of Climatology, 2004. 24(5): p. 603-612.

907. Kwok, R., Baffin Bay ice drift and export: 2002-2007. Geophysical Research Letters, 2007. 34(19).

908. Lacelle, D., et al., Weathering regime and geochemical conditions in a polar desert environment, Haughton impact structure region, Devon Island, Canada. Canadian Journal of Earth Sciences, 2008. 45(10): p. 1139-1157.

909. Lacelle, D., B. Lauriol, and I.D. Clark, Effect of chemical composition of water on the oxygen-18 and carbon-13 signature preserved in cryogenic carbonates, Arctic Canada: Implications in paleoclimatic studies. Chemical Geology, 2006. 234(1-2): p. 1-16.

910. Lacelle, D., B. Lauriol, and I.D. Clark, Origin, age, and paleoenvironmental significance of carbonate precipitates from a granitic environment, Akshayuk Pass, southern Baffin Island, Canada. Canadian Journal of Earth Sciences, 2007. 44(1): p. 61-79.

911. Lacelle, D., et al., (Micro) morphological, inorganic-organic isotope geochemisty and microbial populations in endostromatolites (cf. fissure calcretes), Haughton impact structure, Devon Island, Canada: The influence of geochemical pathways on the preservation of isotope biomarkers. Earth and Planetary Science Letters, 2009. 281(3-4): p. 202-214.

912. Lahoutifard, N., L. Poissant, and S.L. Scott, Scavenging of gaseous mercury by acidic snow at Kuujjuarapik, Northern Quebec. Science of the Total Environment, 2006. 355(1-3): p. 118-126.

913. Lahoutifard, N.S.M.L.D., Total and methyl mercury patterns in Arctic snow during springtime at Resolute, Nunavut, Canada. Atmospheric Environment, 2005. 39(39): p. 7597-7606.

914. Laidre, K.L. and M.P. Heide-Jorgensen, Winter feeding intensity of narwhals (Monodon monoceros). Marine Mammal Science, 2005. 21(1): p. 45-57.

915. Laidre, K.L. and M.P. Heide-Jorgensen, Using Narwhals as Ocean-Observing Platforms in the High Arctic. Oceanography, 2007. 20(4): p. 30-35.

916. Laidre, K.L., M.P. Heide-Jorgensen, and R. Dietz, Diving behaviour of narwhals (Monodon monoceros) at two coastal localities in the Canadian High Arctic. Canadian Journal of Zoology-Revue Canadienne De Zoologie, 2002. 80(4): p. 624-635.

917. Laidre, K.L., et al., Deep-diving by narwhals Monodon monoceros: differences in foraging behavior between wintering areas? Marine Ecology-Progress Series, 2003. 261: p. 269-281.

918. Laidre, K.L., et al., Deep-ocean predation by a high Arctic cetacean. Ices Journal of Marine Science, 2004. 61(3): p. 430-440.

919. Laidre, K.L., et al., Seasonal narwhal habitat associations in the high Arctic. Marine Biology, 2004. 145(4): p. 821-831.

920. Laidre, K.L., et al., Fractal analysis of narwhal space use patterns. Zoology, 2004. 107(1): p. 3-11.

921. Laidre, K.L., M.P. Heide-Jorgensen, and J.R. Orr, Reactions of Narwhals, Monodon monoceros, to Killer Whale, Orcinus orca, attacks in the Eastern Canadian Arctic. Canadian Field-Naturalist, 2006. 120(4): p. 457-465.

922. Laine, V., Arctic sea ice regional albedo variability and trends, 1982-1998. Journal of Geophysical Research-Oceans, 2004. 109(C6).

923. Lajeunesse, P. and M. Allard, Sedimentology of an ice-contact glaciomarine fan complex, Nastapoka Hills, eastern Hudson bay, northern Quebec. Sedimentary Geology, 2002. 152(3-4): p. 201-220.

924. Lalande, C., et al., Variability in the annual cycle of vertical particulate organic carbon export on Arctic shelves: Contrasting the Laptev Sea, Northern Baffin Bay and the Beaufort Sea. Continental Shelf Research, 2009. 29(17): p. 2157-2165.

925. Lambden, J., et al., Traditional and market food access in Arctic Canada is affected by economic factors. International Journal of Circumpolar Health, 2006. 65(4): p. 331-340.

926. Lammers, R.B., et al., Assessment of contemporary Arctic river runoff based on observational discharge records. Journal of Geophysical Research-Atmospheres, 2001. 106(D4): p. 3321-3334.

927. Lamoureux, S., Five centuries of interannual sediment yield and rainfall-induced erosion in the Canadian High Arctic recorded in lacustrine varves. Water Resources Research, 2000. 36(1): p. 309-318.

928. Lamoureux, S.F. and R. Gilbert, A 750-yr record of autumn snowfall and temperature variability and winter storminess recorded in the varved sediments of Bear Lake, Devon Island, Arctic Canada. Quaternary Research, 2004. 61(2): p. 134-147.

929. Lamoureux, S.F., R. Gilbert, and T. Lewis, Lacustrine sedimentary environments in high arctic proglacial Bear Lake, Devon Island, Nunavut, Canada. Arctic Antarctic and Alpine Research, 2002. 34(2): p. 130-141.

930. Lamoureux, S.F., et al., An incidence of multi-year sediment storage on channel snowpack in the Canadian High Arctic. Arctic, 2006. 59(4): p. 381-390.

931. Landerer, F.W., J.H. Jungclaus, and J. Marotzke, Regional dynamic and steric sea level change in response to the IPCC-A1B scenario. Journal of Physical Oceanography, 2007. 37(2): p. 296-312.

932. Lankford, K., Arctic Explorer Robert E. Peary's Other Quest: Money, Science, and the Year 1897. American Nineteenth Century History, 2008. 9(1): p. 37-60.

933. Lapoussiere, A., et al., Spatial variability in organic material sinking export in the Hudson Bay system, Canada, during fall. Continental Shelf Research, 2009. 29(9): p. 1276-1288.

934. Larsen, L.M.H.M.H.L.M.C.R.A.D.R.A.F.R., Tectonomagmatic events during stretching and basin formation in the Labrador Sea and the Davis Strait: Evidence from age and composition of Mesozoic to Palaeogene dyke swarms in West Greenland. Journal of the Geological Society, 2009. 166(6): p. 999-1012.

935. Larsen, L.M.P.A.K., Petrology of the paleocene picrites and flood basalts on disko and nuussuaq, West Greenland. Journal of Petrology, 2009. 50(9): p. 1667-1711.

936. Latour, P.B., C.S. Machtans, and G.W. Beyersbergen, Shorebird and passerine abundance and habitat use at a High Arctic breeding site: Creswell Bay, Nunavut. Arctic, 2005. 58(1): p. 55-65.

937. Latteck, R., et al., Similarities and differences in polar mesosphere summer echoes observed in the Arctic and Antarctica. Annales Geophysicae, 2008. 26(9): p. 2795-2806.

938. Lauderdale, J.M.B.S.G.A.C.N.H.N.P., Intensified turbulent mixing in the boundary current system of southern Greenland. Geophysical Research Letters, 2008. 35(4).

939. Laugrand, F. and J. Oosten, Canicide and healing - The position of the dog in the Inuit cultures of the Canadian Arctic. Anthropos, 2002. 97(1): p. 89-105.

940. Laugrand, F. and J. Oosten, Reconnecting people and healing the land: Inuit Pentecostal and Evangelical movements in the Canadian Eastern Arctic. Numen-International Review for the History of Religions, 2007. 54(3): p. 229-269.

941. Laugrand, F.O.J.T.F., Hunters, owners, and givers of light: The tuurngait of south Baffin Island. Arctic Anthropology, 2002. 39(1): p. 27-50.

942. Lauster, N. and F. Tester, Culture as a problem in linking material inequality to health: on residential crowding in the Arctic. Health Place, 2010. 16(3): p. 523-30.

943. Lavender, K.L.B.O.W.D.R.E., The mid-depth circulation of the subpolar North Atlantic Ocean as measured by subsurface floats. Deep Sea Research Part I: Oceanographic Research Papers, 2005. 52(5): p. 767-785.

944. Lavoie, C., Late Holocene climate of the James Bay area, Québec, Canada, reconstructed using fossil beetles. Arctic, Antarctic, and Alpine Research, 2001. 33(1): p. 13-18.

945. Lavoie, D., K. Denman, and C. Michel, Modeling ice algal growth and decline in a seasonally ice-covered region of the Arctic (Resolute Passage, Canadian Archipelago). Journal of Geophysical Research-Oceans, 2005. 110(C11).

946. Lavoie, E., et al., Evaluation of the efficacy of the Toxoplasma gondii screening program among pregnant women in Nunavik, 1994-2003. Canadian Journal of Public Health-Revue Canadienne De Sante Publique, 2008. 99(5): p. 397-400.

947. Lazenby, R.A., Prediction of cross-sectional geometry from metacarpal radiogrammetry: A validation study. American Journal of Human Biology, 2002. 14(1): p. 74-80.

948. LeBlanc, M., K. Gajewski, and P.B. Hamilton, A diatom-based Holocene palaeoenvironmental record from a mid-arctic lake on Boothia Peninsula, Nunavut, Canada. Holocene, 2004. 14(3): p. 417-425.

949. Leclair, D., et al., Evaluation of a digestion assay and determination of sample size and tissue for the reliable detection of Trichinella larvae in walrus meat. J Vet Diagn Invest, 2003. 15(2): p. 188-91.

950. Leclair, D., et al., A preliminary investigation on the infectivity of Trichinella larvae in traditional preparations of walrus meat. Parasitol Res, 2004. 93(6): p. 507-9.

951. Ledu, D., et al., Palynological evidence of Holocene climate change in the eastern Arctic: a possible shift in the Arctic oscillation at the millennial time scale. Canadian Journal of Earth Sciences, 2008. 45(11): p. 1363-1375.

952. Ledwell, W.H.J.B.S.L.J., The most southerly record of a stranded bowhead whale, Balaena mysticetus, from the Western North Atlantic Ocean. Arctic, 2007. 60(1): p. 17-22.

953. Lee, P.A., et al., Particulate dimethylsulfoxide in Arctic sea-ice algal communities: The cryoprotectant hypothesis revisited. Journal of Phycology, 2001. 37(4): p. 488-499.

954. Lee, P.A., et al., Influence of copepod grazing on concentrations of dissolved dimethylsulfoxide and related sulfur compounds in the North Water, northern Baffin Bay. Marine Ecology-Progress Series, 2003. 255: p. 235-248.

955. Legare, A., Inuit identity and regionalization in the Canadian Central and Eastern Arctic: A survey of writings about Nunavut. Polar Geography, 2008. 31(3): p. 99-118.

956. Legaspi, A. and E. Orr, Disseminating research on community health and well-being: a collaboration between Alaska Native villages and the academe. Am Indian Alsk Native Ment Health Res, 2007. 14(1): p. 24-43.

957. Leira, M., Diatom responses to Holocene environmental changes in a small lake in northwest Spain. Quaternary International, 2005. 140: p. 90-102.

958. Lekens, W.A.H.S.H.P.H.H.P.G.O.H.B.K.G., Laminated sediments preceding Heinrich event 1 in the Northern North Sea and Southern Norwegian Sea: Origin, processes and regional linkage. Marine Geology, 2005. 216(1): p. 27-50.

959. Lemelin, H., et al., Climate change, wellbeing and resilience in the Weenusk First Nation at Peawanuck: the Moccasin Telegraph goes global. Rural Remote Health, 2010. 10(2): p. 1333.

960. LeMoine, G., Woman of the house: Gender, architecture, and ideology in dorset prehistory. Arctic Anthropology, 2003. 40(1): p. 121-138.

961. Leonard, W.R., J.J. Snodgrass, and M.V. Sorensen, Metabolic adaptation in indigenous Siberian populations. Annual Review of Anthropology, 2005. 34: p. 451-471.

962. Leonard, W.R., et al., Climatic influences on basal metabolic rates among circumpolar populations. Am J Hum Biol, 2002. 14(5): p. 609-20.

963. Lesins, G., et al., Large surface radiative forcing from topographic blowing snow residuals measured in the High Arctic at Eureka. Atmospheric Chemistry and Physics, 2009. 9(6): p. 1847-1862.

964. Lesins, G.B.L.D.T.J.D.J.R.E.E.W.W.V.P., Large surface radiative forcing from surface-based ice crystal events measured in the High Arctic at Eureka. Atmospheric Chemistry and Physics Discussions, 2008. 8(5): p. 17691-17737.

965. Lesins, G.D.T.D.J., Climate trends at Eureka in the Canadian high arctic. Atmosphere Ocean, 2010. 48(2): p. 59-80.

966. Leslie, A.B.P.H.W., Fossil floras from the Emma Fiord Formation (Viséan, Mississippian) of the Canadian Arctic Archipelago and their paleoenvironmental context. Review of Palaeobotany and Palynology, 2010. 159(3): p. 195-203.

967. Letcher, R.J.V.J.B.J.O.D.R.S.C.J.B.M.J.E.H.V.M.M.G.G.W., Exposure and effects assessment of persistent organohalogen contaminants in arctic wildlife and fish. Science of the Total Environment, 2010. 408(15): p. 2995-3043.

968. Levac, E., A. De Vernal, and W. Blake, Sea-surface conditions in northernmost Baffin Bay during the Holocene: palynological evidence. Journal of Quaternary Science, 2001. 16(4): p. 353-363.

969. Leverington, D.W., Discrimination of sedimentary lithologies using Hyperion and Landsat Thematic Mapper data: a case study at Melville Island, Canadian High Arctic. International Journal of Remote Sensing, 2010. 31(1): p. 233-260.

970. Levy, R. and P. Dawson, Using finite element methods to analyze ancient architecture: an example from the North American Arctic. Journal of Archaeological Science, 2009. 36(10): p. 2298-2307.

971. Lewis, A.E., et al., Movement and Aggregation of Eastern Hudson Bay Beluga Whales (Delphinapterus leucas): A Comparison of Patterns Found through Satellite Telemetry and Nunavik Traditional Ecological Knowledge. Arctic, 2009. 62(1): p. 13-24.

972. Lewis, T., et al., An extreme sediment transfer event in a Canadian High Arctic stream. Arctic Antarctic and Alpine Research, 2005. 37(4): p. 477-482.

973. Lewis, T., P. Francus, and R. Bradley, Recent occurrence of large jokulhlaups at Lake Tuborg, Ellesmere Island, Nunavut. Journal of Paleolimnology, 2009. 41(3): p. 491-506.

974. Lewis, T., R. Gilbert, and S.F. Lamoureux, Spatial and temporal changes in sedimentary processes at proglacial Bear Lake, Devon Island, Nunavut, Canada. Arctic Antarctic and Alpine Research, 2002. 34(2): p. 119-129.

975. Lewis, T.B.R.S.F.P., Limnology, sedimentology, and hydrology of a jökulhlaup into a meromictic High Arctic lake. Canadian Journal of Earth Sciences, 2007. 44(6): p. 791-806.

976. Lewkowicz, A.G. and S.V. Kokelj, Slope sediment yield in and lowland continuous permafrost environments, Canadian Arctic Archipelago. Catena, 2002. 46(4): p. 261-283.

977. Li, C.S., et al., Total filterable mercury and Pb-210 in the Canadian Arctic air. Journal of Environmental Monitoring, 2009. 11(8): p. 1460-1461.

978. Li, C.S., J. Cornett, and K. Ungar, Long-term decrease of cadmium concentrations in the Canadian Arctic air. Geophysical Research Letters, 2003. 30(5).

979. Li, R.Y. and B. Jones, Middle Devonian brachiopods from the Bird Fjord Formation, Arctic Canada. Journal of Paleontology, 2003. 77(2): p. 243-266.

980. Li, Y.K., et al., Unraveling complex exposure-burial histories of bedrock surfaces under ice sheets by integrating cosmogenic nuclide concentrations with climate proxy records. Geomorphology, 2008. 99(1-4): p. 139-149.

981. Lietaer, O., T. Fichefet, and V. Legat, The effects of resolving the Canadian Arctic Archipelago in a finite element sea ice model. Ocean Modelling, 2008. 24(3-4): p. 140-152.

982. Lim, D.S.S. and M.S.V. Douglas, Limnological characteristics of 22 lakes and ponds in the Haughton Crater region of Devon Island, Nunavut, Canadian High Arctic. Arctic Antarctic and Alpine Research, 2003. 35(4): p. 509-519.

983. Lim, D.S.S., M.S.V. Douglas, and J.P. Smol, Diatoms and their relationship to environmental variables from lakes and ponds on Bathurst Island, Nunavut, Canadian High Arctic. Hydrobiologia, 2001. 450(1-3): p. 215-230.

984. Lim, D.S.S., M.S.V. Douglas, and J.P. Smol, Limnology of 46 lakes and ponds on Banks Island, NWT, Canadian Arctic Archipelago. Hydrobiologia, 2005. 545: p. 11-32.

985. Lim, D.S.S., et al., Physical and chemical limnological characteristics of 38 lakes and ponds on Bathurst Island, Nunavut, Canadian High Arctic. International Review of Hydrobiology, 2001. 86(1): p. 1-22.

986. Lim, D.S.S., C. Kwan, and M.S.V. Douglas, Periphytic diatom assemblages from Bathurst Island, Nunavut, Canadian High Arctic: An examination of community relationships and habitat preferences. Journal of Phycology, 2001. 37(3): p. 379-392.

987. Lim, D.S.S., J.P. Smol, and M.S.V. Douglas, Diatom assemblages and their relationships to lakewater nitrogen levels and other limnological variables from 36 lakes and ponds on Banks Island, NWT, Canadian Arctic. Hydrobiologia, 2007. 586: p. 191-211.

988. Lim, D.S.S., J.P. Smol, and M.S.V. Douglas, Recent environmental changes on Banks Island (NWT, Canadian Arctic) quantified using fossil diatom assemblages. Journal of Paleolimnology, 2008. 40(1): p. 385-398.

989. Liptzin, D., A banded vegetation pattern in a high arctic community on Axel Heiberg Island, Nunavut, Canada. Arctic Antarctic and Alpine Research, 2006. 38(2): p. 216-223.

990. Lique, C., et al., On the origins of water masses exported along both sides of Greenland: A Lagrangian model analysis. Journal of Geophysical Research-Oceans, 2010. 115.

991. Lique, C., et al., A model-based study of ice and freshwater transport variability along both sides of Greenland. Climate Dynamics, 2009. 33(5): p. 685-705.

992. Liu, J.L. and R.E. Stewart, Water vapor fluxes over the Saskatchewan River basin. Journal of Hydrometeorology, 2003. 4(5): p. 944-959.

993. Liu, J.P., J.A. Curry, and Y.Y. Hu, Recent Arctic Sea Ice Variability: Connections to the Arctic Oscillation and the ENSO. Geophysical Research Letters, 2004. 31(9).

994. Liu, J.P., et al., Sensitivity of sea ice to physical parameterizations in the GISS global climate model. Journal of Geophysical Research-Oceans, 2003. 108(C2).

995. Liu, J.P., et al., Assessment of surface air temperature over the Arctic Ocean in reanalysis and IPCC AR4 model simulations with IABP/POLES observations. Journal of Geophysical Research-Atmospheres, 2008. 113(D10).

996. Liu, Y.S. and J.F. Basinger, Metasequoia HU et CHENG (Cupressaceae) from the Eocene of Axel Heiberg Island, Canadian High Arctic. Palaeontographica Abteilung B-Palaophytologie, 2009. 282(1-3): p. 69-+.

997. Lloyd, J.M., Modern distribution of benthic foraminifera from Disko Bugt, west Greenland. Journal of Foraminiferal Research, 2006. 36(4): p. 315-+.

998. Lobb, J., et al., Structure and mixing across an Arctic/Atlantic front in northern Baffin Bay. Geophysical Research Letters, 2003. 30(16).

999. Loewen, T.N., D. Gillis, and R.F. Tallman, Ecological niche specialization inferred from morphological variation and otolith strontium of Arctic charr Salvelinus alpinus L. found within open lake systems of southern Baffin Island, Nunavut, Canada. Journal of Fish Biology, 2009. 75(6): p. 1473-1495.

1000. Loewen, T.N., D. Gillis, and R.F. Tallman, Maturation, growth and fecundity of Arctic charr, Salvelinus alpinus (L.), life-history variants co-existing in lake systems of Southern Baffin Island, Nunavut, Canada. Hydrobiologia, 2010. 650(1): p. 193-202.

1001. Lohmann, R., et al., Oceanic deep water formation as a sink of persistent organic pollutants. Geophysical Research Letters, 2006. 33(12).

1002. Lopez, P., T. Schmith, and E. Kaas, Sensitivity of the Northern Hemisphere circulation to North Atlantic SSTs in the ARPEGE climate AGCM. Climate Dynamics, 2000. 16(7): p. 535-547.

1003. Lorenzo, M.N.I.I.T.J.J., Sensitivity of thermohaline circulation to decadal and multidecadal variability. Ices Journal of Marine Science, 2009. 66(7): p. 1439-1447.

1004. Loring, S.S.A., Further documentation supporting the former existence of grizzly bears (Ursus arctos) in northern Quebec-Labrador. Arctic, 2007. 60(1): p. 7-16.

1005. Louarn, E.M.P.M.H.D.B.E.B.S., Upper Labrador Sea Water in the Irminger Sea during a weak convection period (2002-2006). Ocean Science Discussions, 2009. 6(3): p. 2085-2113.

1006. Louchini, R. and M. Beaupre, Cancer incidence and mortality among Aboriginal people living on reserves and northern villages in Quebec, 1988-2004. Int J Circumpolar Health, 2008. 67(5): p. 445-51.

1007. Louis, W. and D.M. Taylor, When the survival of a language is at stake - The future of Inuttitut in arctic Quebec. Journal of Language and Social Psychology, 2001. 20(1-2): p. 111-143.

1008. Loukacheva, N., Nunavut and Canadian Arctic Sovereignty. Journal of Canadian Studies-Revue D Etudes Canadiennes, 2009. 43(2): p. 82-108.

1009. Loukacheva, N., Arctic indigenous peoples' internationalism: in search of a legal justification. Polar Record, 2009. 45(232): p. 51-58.

1010. Lu, J.Y. and W.H. Schroeder, Annual time-series of total filterable atmospheric mercury concentrations in the Arctic. Tellus Series B-Chemical and Physical Meteorology, 2004. 56(3): p. 213-222.

1011. Lu, J.Y., W.H. Schroeder, and G. Keeler, Field intercomparison studies for evaluation and validation of the AESminiSamplR technique for sampling and analysis of total particulate mercury in the atmosphere. Sci Total Environ, 2003. 304(1-3): p. 115-25.

1012. Lucas, M., et al., Gestational age and birth weight in relation to n-3 fatty acids among Inuit (Canada). Lipids, 2004. 39(7): p. 617-626.

1013. Lund, E., et al., Population based study of health and living conditions in areas with both Sami and Norwegian populations--the SAMINOR study. Int J Circumpolar Health, 2007. 66(2): p. 113-28.

1014. Lund, K.E. and K.L. Young, Contaminant transport in high arctic soils: A tracer experiment. Permafrost and Periglacial Processes, 2005. 16(2): p. 195-207.

1015. Lundrigan, T.A., J.D. Reist, and M.M. Ferguson, Microsatellite genetic variation within and among Arctic charr (Salvelinus alpinus) from aquaculture and natural populations in North America. Aquaculture, 2005. 244(1-4): p. 63-75.

1016. Lunn, N.J., et al., Cub adoption by polar bears (Ursus maritimus): determining relatedness with microsatellite markers. Journal of Zoology, 2000. 251: p. 23-30.

1017. Luque, S.P. and S.H. Ferguson, Age structure, growth, mortality, and density of belugas (Delphinapterus leucas) in the Canadian Arctic: responses to environment? Polar Biology, 2010. 33(2): p. 163-178.

1018. Lynge, A., Indigenous peoples health in the Arctic. Int J Circumpolar Health, 2004. 63 Suppl 2: p. 33-7.

1019. Lynge, F., Full circle. Ambio, 2008. 37(SPEC. ISS.): p. 514-516.

1020. Lynnerup, N.M.J.A.M.J.J.K.A.F.B., Human Dorset Remains from Igloolik, Canada. Arctic, 2003. 56(4): p. 349-358.

1021. Lynnerup, N.N.S., The Greenland Norse: Bones, graves, computers, and DNA. Polar Record, 2004. 40(213): p. 107-111.

1022. Ma, W.K., et al., Assessing the potential of ammonia oxidizing bacteria to produce nitrous oxide in soils of a high arctic lowland ecosystem on Devon Island, Canada. Soil Biology & Biochemistry, 2007. 39(8): p. 2001-2013.

1023. MacDonald, E.W., Palaeoscenidiidae (Radiolaria) from the Lower Silurian of the Cape Phillips Formation, Cornwallis Island, Nunavut, Canada. Journal of Paleontology, 2004. 78(2): p. 257-274.

1024. MacDonald, E.W., A preliminary radiolarian biozonation for the Lower Silurian of the Cape Phillips Formation, Nunavut, Canada. Canadian Journal of Earth Sciences, 2006. 43(2): p. 205-211.

1025. MacGabhann, B.A., Discoidal fossils of the Ediacaran biota: A review of current understanding. Geological Society Special Publication The Rise and Fall of the Ediacaran Biota n286 (2007 12 01): 297-313 Journal Code: Geol. Soc. Spec. Publ., 2007. 286: p. 297-313.

1026. MacLean, B., Bedrock geology of Hudson Strait and Ungava Bay. Bulletin of the Geological Survey of Canada Marine Geology of Hudson Strait and Ungava Bay, Eastern Arctic Canada: Late Quarternary Sediments, Depositional Environments, and Late Glacia Deglacial History Derived from Marine Terrestrial Studies n566, 2001. 05(01): p. 65-69.

1027. MacLean, B., Introduction: Geographic setting and studies. Bulletin of the Geological Survey of Canada Marine Geology of Hudson Strait and Ungava Bay, Eastern Arctic Canada: Late Quarternary Sediments, Depositional Environments, and Late Glacia Deglacial History Derived from Marine Terrestrial Studies n566, 2001. 05(01): p. 5-17.

1028. MacLean, B.A.J.T.G.J.T.H.F.R.H.I.J.A.E.M.W.F.P.W.T.V.G., Hudson Strait Quarternary sediments and late glacial and deglaciation history: A discussion and summary. Bulletin of the Geological Survey of Canada Marine Geology of Hudson Strait and Ungava Bay, Eastern Arctic Canada: Late Quarternary Sediments, Depositional Environments, and Late Glacia Deglacial History Derived from Marine Terrestrial Studies n566, 2001. 05(02): p. 181-191.

1029. MacLean, B.V.G.H.I.D.B.J.A.E.M.W.F., Quarternary sediments in Hudson Strait and Ungava Bay. Bulletin of the Geological Survey of Canada Marine Geology of Hudson Strait and Ungava Bay, Eastern Arctic Canada: Late Quarternary Sediments, Depositional Environments, and Late Glacia Deglacial History Derived from Marine Terrestrial Studies n566, 2001. 05(01): p. 71-125.

1030. Mair, D., et al., Mass balance of the Prince of Wales Icefield, Ellesmere Island, Nunavut, Canada. Journal of Geophysical Research-Earth Surface, 2009. 114.

1031. Majorowicz, J.A. and K.G. Osadetz, Gas hydrate distribution and volume in Canada. Aapg Bulletin, 2001. 85(7): p. 1211-1230.

1032. Maletz, J.B.D.L., The Middle Ordovician Proventocitum procerulum radiolarian assemblage of Spitsbergen and its biostratigraphic correlation. Palaeontology, 2008. 51(5): p. 1181-1200.

1033. Malhi, R.S., et al., Patterns of mtDNA diversity in northwestern North America. Hum Biol, 2004. 76(1): p. 33-54.

1034. Malhotra, V.M., M.H. Zhang, and S.L. Sarkar, Manufacture of concrete test panels and their performance after seven years of exposure in arctic marine environment. Aci Materials Journal, 2000. 97(2): p. 99-107.

1035. Mallinson, D., et al., Optically stimulated luminescence age controls on late Pleistocene and Holocene coastal lithosomes, North Carolina, USA. Quaternary Research, 2008. 69(1): p. 97-109.

1036. Mallory, M.L., Marine plastic debris in northern fulmars from the Canadian high Arctic. Marine Pollution Bulletin, 2008. 56(8): p. 1501-1504.

1037. Mallory, M.L., et al., Movements of Long-tailed Ducks wintering on Lake Ontario to breeding areas in Nunavut, Canada. Wilson Journal of Ornithology, 2006. 118(4): p. 494-501.

1038. Mallory, M.L., et al., Autumn migration and wintering of northern fulmars (Fulmarus glacialis) from the Canadian high Arctic. Polar Biology, 2008. 31(6): p. 745-750.

1039. Mallory, M.L., J.A. Akearok, and A.J. Gaston, Status of High Arctic Black-Legged Kittiwake (Rissa tridactyla) Colonies in Barrow Strait, Nunavut, Canada. Arctic, 2009. 62(1): p. 96-101.

1040. Mallory, M.L., B.M. Braune, and M.R. Forbes, Contaminant concentrations in breeding and non-breeding northern fulmars (Fulmarus glacialis L.) from the Canadian high arctic. Chemosphere, 2006. 64(9): p. 1541-4.

1041. Mallory, M.L., et al., Persistent organic pollutants in marine birds, arctic hare and ringed seals near Qikiqtarjuaq, Nunavut, Canada. Marine Pollution Bulletin, 2005. 50(1): p. 95-102.

1042. Mallory, M.L., et al., Harlequin Ducks in Nunavut. Waterbirds, 2008. 31: p. 15-18.

1043. Mallory, M.L., A.J. Fontaine, and H. Boyd, Breeding and non-breeding range of Canada, Branta canadensis, and cackling geese, Branta hutchinsii, in the eastern Canadian Arctic. Canadian Field-Naturalist, 2005. 119(4): p. 483-489.

1044. Mallory, M.L., et al., Water chemistry of ponds on Southampton Island, Nunavut, Canada: Effects of habitat and ornithogenic inputs. Archiv Fur Hydrobiologie, 2006. 166(3): p. 411-432.

1045. Mallory, M.L. and M.R. Forbes, Sex discrimination and measurement bias in Northern Fulmars Fulmarus glacialis from the Canadian Arctic. Ardea, 2005. 93(1): p. 25-36.

1046. Mallory, M.L., et al., Factors Influencing Colony Attendance by Northern Fulmars in the Canadian High Arctic. Arctic, 2009. 62(2): p. 151-158.

1047. Mallory, M.L., et al., Influence of weather on reproductive success of northern fulmars in the Canadian high Arctic. Polar Biology, 2009. 32(4): p. 529-538.

1048. Mallory, M.L. and H.G. Gilchrist, Marine birds breeding in Penny Strait and Queens Channel, Nunavut, Canada. Polar Research, 2003. 22(2): p. 399-403.

1049. Mallory, M.L. and H.G. Gilchrist, Marine birds of the Hell Gate Polynya, Nunavut, Canada. Polar Research, 2005. 24(1-2): p. 87-93.

1050. Mallory, M.L., H.G. Gilchrist, and C.L. Mallory, Ross's gull (Rhodostethia rosea) breeding in Penny Strait, Nunavut, Canada. Arctic, 2006. 59(3): p. 319-321.

1051. Mallory, M.L., J.D. McLaughlin, and M.R. Forbes, Breeding status, contaminant burden and helminth parasites of Northern Fulmars Fulmarus glacialis from the Canadian high Arctic. Ibis, 2007. 149(2): p. 338-344.

1052. Mallory, M.L., et al., Seabirds as indicators of aquatic ecosystem conditions: a case for gathering multiple proxies of seabird health. Mar Pollut Bull, 2010. 60(1): p. 7-12.

1053. Mallory, M.L., et al., Trace elements in marine birds, Arctic hare and ringed seals breeding near Qikiqtarjuaq, Nunavut, Canada. Marine Pollution Bulletin, 2004. 49(1-2): p. 135-141.

1054. Mallory, M.L., et al., Walrus (Odobenus rosmarus) predation on adult thick-billed murres (Uria lomvia) at Coats Island, Nunavut, Canada. Polar Research, 2004. 23(1): p. 111-114.

1055. Mallory, M.L.F.A.J.A.J., Status of the Harlequin Duck Histrionicus histrionicus on Baffin Island, Nunavut, Canada. Wildfowl, 2003. 54: p. 95-102.

1056. Mallory, M.L.F.A.J., Key marine habitat sites for migratory birds in Nunavut and the Northwest Territories. Occasional Paper of the Canadian Wildlife Service Key marine habitat sites for migratory birds in Nunavut and the Northwest territories n109, 2004. 03(01): p. 3-85.

1057. Mallory, M.L.R.G.J.M.A., Marine plastic debris in northern fulmars from Davis Strait, Nunavut, Canada. Marine Pollution Bulletin, 2006. 52(7): p. 813-815.

1058. Manby, G. and N. Lyberis, Pre-ocean opening compression of the Northwestern Atlantic margin: evidence from eastern North Greenland. Journal of the Geological Society, 2000. 157: p. 707-710.

1059. Manley, W.F.M.G.H., Glacial-geologica record on Southern Baffin Island reflecting late glacial-sheet dynamics in the Eastern Hudson Strait region. Bulletin of the Geological Survey of Canada Marine Geology of Hudson Strait and Ungava Bay, Eastern Arctic Canada: Late Quarternary Sediments, Depositional Environments, and Late Glacia Deglacial History Derived from Marine Terrestrial Studies n566, 2001. 05(01): p. 19-30.

1060. Manson, A.H.M.C.E.C.T.X.X.A.T.T.M.D.J.R.H.C.M.H.W.K.J., Arctic tidal characteristics at Eureka (80&#x00B0; N, 86&#x00B0; W) and Svalbard (78&#x00B0; N, 16&#x00B0; E) for 2006/07: Seasonal and longitudinal variations, migrating and non-migrating tides. Annales Geophysicae, 2009. 27(3): p. 1153-1173.

1061. Manson, G.K., et al., Spatial variability of factors influencing coastal change in the western Canadian Arctic. Geo-Marine Letters, 2005. 25(2-3): p. 138-145.

1062. Maqueda, M.A.M. and A.J. Willmott, A two-dimensional time-dependent model of a wind-driven coastal polynya: Application to the St. Lawrence Island polynya. Journal of Physical Oceanography, 2000. 30(6): p. 1281-1304.

1063. Marcoux, M., M. Auger-Methe, and M.M. Humphries, Encounter frequencies and grouping patterns of narwhals in Koluktoo Bay, Baffin Island. Polar Biology, 2009. 32(12): p. 1705-1716.

1064. Markus, T., et al., Comparison of aerial video and Landsat 7 data over ponded sea ice. Remote Sensing of Environment, 2003. 86(4): p. 458-469.

1065. Markus, T.C.D.J.I.A., The potential of using Landsat 7 ETM + for the classification of sea-ice surface conditions during summer. Annals of Glaciology Papers from the Fourth International Symposium on Remote Sensing in Glaciology held in Colleg Park, Maryland, USA, 2001. 34: p. 415-419.

1066. Marquette, G.C., et al., Felsenmeer persistence under non-erosive ice in the Torngat and Kaumajet mountains, Quebec and Labrador, as determined by soil weathering and cosmogenic nuclide exposure dating. Canadian Journal of Earth Sciences, 2004. 41(1): p. 19-38.

1067. Marsden, R.F., et al., Are polynyas self-sustaining? Atmosphere-Ocean, 2004. 42(4): p. 251-265.

1068. Marsella, K.A., et al., Cosmogenic Be-10 and Al-26 ages for the Last Glacial Maximum, eastern Baffin Island, Arctic Canada. Geological Society of America Bulletin, 2000. 112(8): p. 1296-1312.

1069. Marsh, R., Recent variability of the North Atlantic thermohaline circulation inferred from surface heat and freshwater fluxes. Journal of Climate, 2000. 13(18): p. 3239-3260.

1070. Marsh, R.D.D.B.J.L.D.C.B.A.C.A.C.A.Y., Short-term impacts of enhanced Greenland freshwater fluxes in an eddy-permitting ocean model. Ocean Science Discussions, 2009. 6(3): p. 2911-2937.

1071. Marshall, S.J.S.M.J., Temperature and melt modeling on the Prince of Wales Ice Field, Canadian high arctic. Journal of Climate, 2009. 22(6): p. 1454-1468.

1072. Martin, A.R.H.P.R.P.R., Dive behaviour of belugas (Delphinapterus leucas) in the shallow waters of western Hudson Bay. Arctic, 2001. 54(3): p. 276-283.

1073. Martin, K. and M.C. James, Conserving sea turtles in Canada: Successful community-based collaboration between fishers and scientists. Chelonian Conservation and Biology, 2005. 4(4): p. 899-907.

1074. Mason, R., Overview of the Social Transition in the North project 1995- 1998. Int J Circumpolar Health, 2004. Suppl 1: p. 5-12.

1075. Masse, H., L. Rochefort, and G. Gauthier, Carrying capacity of wetland habitats used by breeding greater snow geese. Journal of Wildlife Management, 2001. 65(2): p. 271-281.

1076. Matsoukas, C., et al., The effect of Arctic sea-ice extent on the absorbed (net) solar flux at the surface, based on ISCCP-D2 cloud data for 1983-2007. Atmospheric Chemistry and Physics, 2010. 10(2): p. 777-787.

1077. Matthews, J.V.J.F.J.G., Late Tertiary plant and arthropod fossils from the high-terrace sediments on Fosheim Peninsula, Ellesmere Island, Nunavut. Bulletin of the Geological Survey of Canada Environmental response to Climatic change in the Canadian High Arctic n529, 2000. 12(01): p. 295-309.

1078. Matul, A. and A. Abelmann, Pleistocene and Holocene distribution of the radiolarian Amphimelissa setosa Cleve in the North Pacific and North Atlantic: Evidence for water mass movement. Deep-Sea Research Part Ii-Topical Studies in Oceanography, 2005. 52(16-18): p. 2351-2364.

1079. Mauritzen, M., A.E. Derocher, and O. Wiig, Space-use strategies of female polar bears in a dynamic sea ice habitat. Canadian Journal of Zoology-Revue Canadienne De Zoologie, 2001. 79(9): p. 1704-1713.

1080. Mauritzen, M., et al., Using satellite telemetry to define spatial population structure in polar bears in the Norwegian and western Russian Arctic. Journal of Applied Ecology, 2002. 39(1): p. 79-90.

1081. Mayr, U.D.K.H.C.P.K.T.F., Regional geology, northeast Ellesmere Island. Bulletin of the Geological Survey of Canada n592, 2009. 12(01): p. 15-20.

1082. Mayr, U.T.F., Introduction. Bulletin of the Geological Survey of Canada n592, 2009. 12(01): p. 3-13.

1083. McDaniel, L., et al., Metagenomic analysis of lysogeny in Tampa Bay: implications for prophage gene expression. Plos One, 2008. 3(9): p. e3263.

1084. McDonald, D.M. and S.F. Lamoureux, Hydroclimatic and channel snowpack controls over suspended sediment and grain size transport in a High Arctic catchment. Earth Surface Processes and Landforms, 2009. 34(3): p. 424-436.

1085. McGowan, S., D.B. Ryves, and N.J. Anderson, Holocene records of effective precipitation in West Greenland. Holocene, 2003. 13(2): p. 239-249.

1086. McGrath-Hanna, N.K., et al., Diet and mental health in the Arctic: is diet an important risk factor for mental health in circumpolar peoples?--a review. Int J Circumpolar Health, 2003. 62(3): p. 228-41.

1087. McKinney, M.A., et al., Characterization and profiling of hepatic cytochromes P450 and phase II xenobiotic-metabolizing enzymes in beluga whales (Delphinapterus leucas) from the St. Lawrence River Estuary and the Canadian Arctic. Aquatic Toxicology, 2004. 69(1): p. 35-49.

1088. McKinney, M.A., et al., Biotransformation of polybrominated diphenyl ethers and polychlorinated biphenyls in beluga whale (Delphinapterus leucas) and rat mammalian model using an in vitro hepatic microsomal assay. Aquatic Toxicology, 2006. 77(1): p. 87-97.

1089. McKinney, M.A., et al., Organohalogen contaminants and metabolites in beluga whale (Delphinapterus leucas) liver from two Canadian populations. Environmental Toxicology and Chemistry, 2006. 25(5): p. 1246-1257.

1090. McKinnon, L. and J. Bety, Effect of camera monitoring on survival rates of High-Arctic shorebird nests. Journal of Field Ornithology, 2009. 80(3): p. 280-288.

1091. McKinnon, L.G.G.H.F.D., A pelagic seabird survey of arctic and sub-arctic canadian waters during fall. Marine Ornithology, 2009. 37(1): p. 77-84.

1092. McLaren, J.R. and R.L. Jefferies, Initiation and maintenance of vegetation mosaics in an Arctic salt marsh. Journal of Ecology, 2004. 92(4): p. 648-660.

1093. McLeod, B.A.W.B.N.B.M.W.M.M.J.S.W.B.S.H.B.M., Bowhead whales, and not right whales, were the primary target of 16th- to 17th-century Basque whalers in the western North Atlantic. Arctic, 2008. 61(1): p. 61-75.

1094. McLoughlin, P.D., et al., Population delineation of barren-ground grizzly bears in the central Canadian Arctic. Wildlife Society Bulletin, 2002. 30(3): p. 728-737.

1095. McLoughlin, P.D., H.D. Cluff, and F. Messier, Denning ecology of barren-ground grizzly bears in the central Arctic. Journal of Mammalogy, 2002. 83(1): p. 188-198.

1096. McLoughlin, P.D., et al., Hierarchical habitat selection by tundra wolves. Journal of Mammalogy, 2004. 85(3): p. 576-580.

1097. McMahon, B.J., et al., Serologic and clinical outcomes of 1536 Alaska Natives chronically infected with hepatitis B virus. Ann Intern Med, 2001. 135(9): p. 759-68.

1098. McNabb, S., Arctic research at three levels. Int J Circumpolar Health, 2004. Suppl 1: p. 13-8.

1099. Means, S.M., The Social Transition in the North: collection and data access protocols. Int J Circumpolar Health, 2004. Suppl 1: p. 53-6.

1100. Mech, L.D., Lack of reproduction in muskoxen and arctic hares caused by early winter? Arctic, 2000. 53(1): p. 69-71.

1101. Mech, L.D., Decline and recovery of a High Arctic wolf-prey system. Arctic, 2005. 58(3): p. 305-307.

1102. Mech, L.D., Urine-marking and ground-scratching by free-ranging Arctic Wolves, Canis lupus arctos, in summer. Canadian Field-Naturalist, 2006. 120(4): p. 466-470.

1103. Mech, L.D., Annual arctic wolf pack size related to arctic hare numbers. Arctic, 2007. 60(3): p. 309-311.

1104. Medehouenou, T.C.M., et al., Determinants of AhR-mediated transcriptional activity induced by plasma extracts from Nunavik Inuit adults. Chemosphere, 2010. 80(2): p. 75-82.

1105. Mehl, K.R., et al., To winter East or West? Heterogeneity in winter philopatry in a central-Arctic population of King Eiders. Condor, 2004. 106(2): p. 241-251.

1106. Mei, Z.P.L.L.L.C.T.J.E.M.L.A.G.Y.Y.P.L.G.M., Carbon to nitrogen (C:N) stoichiometry of the spring-summer phytoplankton bloom in the North Water Polynya (NOW). Deep Sea Research Part I: Oceanographic Research Papers, 2005. 52(12): p. 2301-2314.

1107. Melchin, M.J.H.C., Carbon isotope chemostratigraphy of the Llandovery in Arctic Canada: Implications for global correlation and sea-level change. Gff, 2006. 128(2): p. 173-180.

1108. Mellin, R., THE EDIBLE LANDSCAPE OF A NEWFOUNDLAND OUTPORT. Open House International, 2009. 34(2): p. 96-106.

1109. Melling, H., Y. Gratton, and G. Ingram, Ocean circulation within the North Water Polynya of Baffin Bay. Atmosphere-Ocean, 2001. 39(3): p. 301-325.

1110. Menu, S., G. Gauthier, and A. Reed, Survival of young greater snow geese (Chen caerulescens atlantica) during fall migration. Auk, 2005. 122(2): p. 479-496.

1111. Merbs, C.F., Spondylolysis in Inuit skeletons from Arctic Canada. International Journal of Osteoarchaeology, 2002. 12(4): p. 279-290.

1112. Merbs, C.F., Asymmetrical spondylolysis. Am J Phys Anthropol, 2002. 119(2): p. 156-74.

1113. Merbs, C.F., Sagittal clefting of the body and other vertebral development errors in Canadian Inuit skeletons. American Journal of Physical Anthropology, 2004. 123(3): p. 236-249.

1114. Mercier, A., et al., First record of the sea cucumber Trachythyone nina (Echinodermata: Holothuroidea) in Canadian waters, with a redescription of the species and notes on its distribution and biology. Marine Biology Research, 2010. 6(3): p. 315-320.

1115. Merkel, F.R., K. Falk, and S.E. Jamieson, Effect of embedded lead shot on body condition of common eiders. Journal of Wildlife Management, 2006. 70(6): p. 1644-1649.

1116. Metz, J.M., J.A. Dowdeswell, and C.M.T. Woodworth-Lynas, Sea-floor scour at the mouth of Hudson Strait by deep-keeled icebergs from the Laurentide Ice Sheet. Marine Geology, 2008. 253(3-4): p. 149-159.

1117. Meyer, A., et al., Population-based survey of invasive bacterial diseases, Greenland, 1995-2004. Emerg Infect Dis, 2008. 14(1): p. 76-9.

1118. Michel, C., M. Gosselin, and C. Nozais, Preferential sinking export of biogenic silica during the spring and summer in the North Water Polynya (northern Baffin Bay): Temperature or biological control? Journal of Geophysical Research-Oceans, 2002. 107(C7).

1119. Michel, C., R.G. Ingram, and L.R. Harris, Variability in oceanographic and ecological processes in the Canadian Arctic Archipelago. Progress in Oceanography, 2006. 71(2-4): p. 379-401.

1120. Michel, C., et al., Significance of sedimentation and grazing by ice micro- and meiofauna for carbon cycling in annual sea ice (northern Baffin Bay). Aquatic Microbial Ecology, 2002. 30(1): p. 57-68.

1121. Michelutti, N., et al., Do spectrally inferred determinations of chlorophyll a reflect trends in lake trophic status? Journal of Paleolimnology, 2010. 43(2): p. 205-217.

1122. Michelutti, N., et al., A test of the possible influence of seabird activity on the Pb-210 flux in high Arctic ponds at Cape Vera, Devon Island, Nunavut: implications for radiochronology. Journal of Paleolimnology, 2008. 40(3): p. 783-791.

1123. Michelutti, N., et al., Trophic position influences the efficacy of seabirds as metal biovectors. Proceedings of the National Academy of Sciences of the United States of America, 2010. 107(23): p. 10543-10548.

1124. Michelutti, N., et al., Physical and chemical limnology of 34 ultra-oligotrophic lakes and ponds near Wynniatt Bay, Victoria Island, Arctic Canada. Hydrobiologia, 2002. 482(1-3): p. 1-13.

1125. Michelutti, N., M.S.V. Douglas, and J.P. Smol, Tracking recent recovery from eutrophication in a high arctic lake (Meretta Lake, Cornwallis Island, Nunavut, Canada) using fossil diatom assemblages. Journal of Paleolimnology, 2002. 28(3): p. 377-381.

1126. Michelutti, N., M.S.V. Douglas, and J.P. Smol, Diatom response to recent climatic change in a high arctic lake (Char Lake, Cornwallis Island, Nunavut). Global and Planetary Change, 2003. 38(3-4): p. 257-271.

1127. Michelutti, N., M.S.V. Douglas, and J.P. Smol, Evaluating diatom community composition in the absence of marked limnological gradients in the high Arctic: a surface sediment calibration set from Cornwallis Island (Nunavut, Canada). Polar Biology, 2007. 30(11): p. 1459-1473.

1128. Michelutti, N., et al., Heightened sensitivity of a poorly buffered high arctic lake to late-Holocene climatic change. Quaternary Research, 2006. 65(3): p. 421-430.

1129. Michelutti, N., et al., Delayed response of diatom assemblages to sewage inputs in an Arctic lake. Aquatic Sciences, 2007. 69(4): p. 523-533.

1130. Michelutti, N., et al., Periphytic diatom assemblages from ultra-oligotrophic and UV transparent lakes and ponds on Victoria Island and comparisons with other diatom surveys in the Canadian Arctic. Journal of Phycology, 2003. 39(3): p. 465-480.

1131. Michelutti, N., et al., Temporal trends of pollution Pb and other metals in east-central Baffin Island inferred from lake sediment geochemistry. Science of the Total Environment, 2009. 407(21): p. 5653-5662.

1132. Michelutti, N., J.P. Smol, and M.S.V. Douglas, Ecological characteristics of modern diatom assemblages from Axel Heiberg Island (High Arctic Canada) and their application to paleolimnological inference models. Canadian Journal of Botany-Revue Canadienne De Botanique, 2006. 84(11): p. 1695-1713.

1133. Michelutti, N., et al., Climatically controlled chemical and biological development in Arctic lakes. Journal of Geophysical Research-Biogeosciences, 2007. 112(G3).

1134. Michelutti, N., et al., Recent primary production increases in arctic lakes. Geophysical Research Letters, 2005. 32(19).

1135. Michelutti, N.S.J.P.K.B.E.L.H.K.L.E.B.J.M.M.M.M.R.W.D.M.S., Accelerated delivery of polychlorinated biphenyls (PCBs) in recent sediments near a large seabird colony in Arctic Canada. Environmental Pollution, 2009. 157(10): p. 2769-2775.

1136. Mikolajewicz, U., et al., Simulating Arctic sea ice variability with a coupled regional atmosphere-ocean-sea ice model. Meteorologische Zeitschrift, 2005. 14(6): p. 793-800.

1137. Milakovic, B., T.J. Carleton, and R.L. Jefferies, Changes in midge (Diptera : Chironomidae) populations of sub-arctic supratidal vernal ponds in response to goose foraging. Ecoscience, 2001. 8(1): p. 58-67.

1138. Milewska, E. and W.D. Hogg, Spatial representativeness of a long-term climate network in Canada. Atmosphere-Ocean, 2001. 39(2): p. 145-161.

1139. Milewska, E.J., R.F. Hopkinson, and A. Niitsoo, Evaluation of geo-referenced grids of 1961-1990 Canadian temperature and precipitation normals. Atmosphere-Ocean, 2005. 43(1): p. 49-75.

1140. Miller, E.H., et al., Variation and integration of the simple mandibular postcanine dentition in two species of phocid seal. Journal of Mammalogy, 2007. 88(5): p. 1325-1334.

1141. Miller, F.L., Multi-island seasonal home range use by two Peary caribou, Canadian High Arctic Islands, Nunavut, 1993-94. Arctic, 2002. 55(2): p. 133-142.

1142. Miller, F.L.B.S.J.C.W.A., Near-total loss of caribou on south-central Canadian Arctic Islands and the role of seasonal migration in their demise. Arctic, 2007. 60(1): p. 23-36.

1143. Miller, G.H., et al., Limited ice-sheet erosion and complex in situ cosmogenic Be-10, Al-26, and C-14 on Baffin Island, Arctic Canada. Quaternary Geochronology, 2006. 1(1): p. 74-85.

1144. Miller, G.H., et al., Holocene glaciation and climate evolution of Baffin Island Arctic Canada. Quaternary Science Reviews, 2005. 24(14-15): p. 1703-1721.

1145. Miller, G.H., et al., The Goldilocks dilemma: big ice, little ice, or "just-right" ice in the Eastern Canadian Arctic. Quaternary Science Reviews, 2002. 21(1-3): p. 33-48.

1146. Miller, L.A., et al., Carbon distributions and fluxes in the North Water, 1998 and 1999. Deep-Sea Research Part Ii-Topical Studies in Oceanography, 2002. 49(22-23): p. 5151-5170.

1147. Miller Mifflin, T. and M. Bzdell, Development of a physiotherapy prioritization tool in the Baffin Region of Nunavut: a remote, under-serviced area in the Canadian Arctic. Rural Remote Health, 2010. 10(2): p. 1466.

1148. Milne, S.B., Palaeo-Eskimo novice flintknapping in the eastern Canadian Arctic. Journal of Field Archaeology, 2005. 30(3): p. 329-345.

1149. Milne, S.B. and S.M. Donnelly, Going to the birds: Examining the importance of avian resources to Pre-Dorset subsistence strategies on southern Baffin Island. Arctic Anthropology, 2004. 41(1): p. 90-112.

1150. Milne, S.B., A. Hamilton, and M. Fayek, Combining Visual and Geochemical Analyses to Source Chert on Southern Baffin Island, Arctic Canada. Geoarchaeology-an International Journal, 2009. 24(4): p. 429-449.

1151. Mitchell, I.L.R.L.C.R.A., The setting and age of the Bermuda Zn-Pb showing, Grinnell Peninsula, Devon Island: Implications for MVT mineralization in the Canadian Arctic. Exploration and Mining Geology, 2004. 13(1): p. 109-118.

1152. Mizoguchi, K., et al., Convective activity in the Labrador Sea: Preconditioning associated with decadal variability in subsurface ocean stratification. Journal of Geophysical Research-Oceans, 2003. 108(C10).

1153. Mock, T. and R. Gradinger, Changes in photosynthetic carbon allocation in algal assemblages of Arctic sea ice with decreasing nutrient concentrations and irradiance. Marine Ecology-Progress Series, 2000. 202: p. 1-11.

1154. Moffitt, P. and J. Wuest, Spirit of the drum: the development of cultural nursing praxis. Can J Nurs Res, 2002. 34(4): p. 107-16.

1155. Moghadam, H.K., M.M. Ferguson, and R.G. Danzmann, Linkage variation at the sex-determining locus within Fraser strain Arctic charr Salvelinus alpinus. Journal of Fish Biology, 2007. 71: p. 294-301.

1156. Moller, L.N., et al., Outbreak of trichinellosis associated with consumption of game meat in West Greenland. Vet Parasitol, 2005. 132(1-2): p. 131-6.

1157. Moller, P.R., Redescription of the Lycodes pallidus species complex (Pisces, Zoarcidae), with a new species from the Arctic/North Atlantic Ocean. Copeia, 2001(4): p. 972-996.

1158. Moller, P.R., A new zoarcid, Lycodes mcallisteri, from eastern Arctic Canada (Teleostei : Perciformes). Ichthyological Research, 2001. 48(2): p. 111-116.

1159. Moller, P.R. and O.A. Jorgensen, Distribution and abundance of eelpouts (Pisces, Zoarcidae) off West Greenland. Sarsia, 2000. 85(1): p. 23-48.

1160. Moller, P.R., et al., A checklist of the fish fauna of Greenland waters. Zootaxa, 2010(2378): p. 1-84.

1161. Momani, M.A., et al., GPS observations at quasi-conjugate points under disturbed conditions. Acta Geophysica, 2008. 56(4): p. 1179-1201.

1162. Monchot, H. and D. Gendron, Disentangling long bones of foxes (Vulpes vulpes and Alopex lagopus) from arctic archaeological sites. Journal of Archaeological Science, 2010. 37(4): p. 799-806.

1163. Monfort, P., S. Demers, and M. Levasseur, Bacterial dynamics in first year sea ice and underlying seawater of Saroma-ko Lagoon (Sea of Okhotsk, Japan) and Resolute Passage (High Canadian Arctic): Inhibitory effects of ice algae on bacterial dynamics. Canadian Journal of Microbiology, 2000. 46(7): p. 623-632.

1164. Montegut, C.D., et al., Control of salinity on the mixed layer depth in the world ocean: 1. General description. Journal of Geophysical Research-Oceans, 2007. 112(C6).

1165. Moore, J.J., et al., Little Ice Age recorded in summer temperature reconstruction from vared sediments of Donard Lake, Baffin Island, Canada. Journal of Paleolimnology, 2001. 25(4): p. 503-517.

1166. Moore, S.E. and K.L. Laidre, Trends in sea ice cover within habitats used by bowhead whales in the western Arctic. Ecological Applications, 2006. 16(3): p. 932-944.

1167. Moorman, B.J., Glacier-permafrost hydrological interconnectivity: Stagnation glacier, Bylot Island, Canada. Geological Society Special Publication n242, 2005. 07(04): p. 63-74.

1168. Moran, S.B., et al., Dissolved and particulate Pa-231 and Th-230 in the Atlantic Ocean: constraints on intermediate/deep water age, boundary scavenging, and Pa-231/Th-230 fractionation. Earth and Planetary Science Letters, 2002. 203(3-4): p. 999-1014.

1169. Moreau, M.G.B.J.F.F.G.-L.M., A new global Paleocene-Eocene apparent polar wandering path loop by &#x0022;stacking&#x0022; magnetostratigraphies: Correlations with high latitude climatic data. Earth and Planetary Science Letters, 2007. 260(1): p. 152-165.

1170. Morey, D.F. and K. Aaris-Sorensen, Paleoeskimo dogs of the Eastern Arctic. Arctic, 2002. 55(1): p. 44-56.

1171. Morgan, M.J.B.W.R.G.A.C.H.A.M.B.S.O.H.E., A comparison of the maturation of Greenland halibut (Reinhardtius hippoglossoides) from populations throughout the North Atlantic. Journal of Northwest Atlantic Fishery Science, 2003. 31: p. 99-112.

1172. Mori, A.S.O.T.U.M.K.H., Changes in the structure and heterogeneity of vegetation and microsite environments with the chronosequence of primary succession on a glacier foreland in Ellesmere Island, high arctic Canada. Ecological Research, 2008. 23(2): p. 363-370.

1173. Morin, A., R. Edouard, and G. Duhaime, Beyond the harsh. Objective and subjective living conditions in Nunavut. Polar Record, 2010. 46(237): p. 97-112.

1174. Morin, S., et al., A high time resolution study of boundary layer ozone chemistry and dynamics over the Arctic Ocean near Alert, Nunavut. Geophysical Research Letters, 2005. 32(8).

1175. Morin, S. and J. Savarino, Polar atmospheric chemistry: oxygen stable isotopes as a new investigation tool. Actualite Chimique, 2006: p. 14-18.

1176. Morin, S., et al., Major influence of BrO on the NOx and nitrate budgets in the Arctic spring, inferred from Delta O-17(NO3-) measurements during ozone depletion events. Environmental Chemistry, 2007. 4(4): p. 238-241.

1177. Morin, S., et al., Signature of Arctic surface ozone depletion events in the isotope anomaly (Delta O-17) of atmospheric nitrate. Atmospheric Chemistry and Physics, 2007. 7: p. 1451-1469.

1178. Morin, S.S.J.B.S.G.S.B.J.W., Pronounced signature of arctic surface ozone depletion events after polar sunrise on &#x0394;17O in atmospheric nitrate. Atmospheric Chemistry and Physics Discussions, 2006. 6(4): p. 6255-6297.

1179. Moro, I., et al., Pyramimonas australis sp nov (Prasinophyceae, Chlorophyta) from Antarctica: fine structure and molecular phylogeny. European Journal of Phycology, 2002. 37(1): p. 103-114.

1180. Morrison, D., Inuvialuit fishing and the Gutchiak site. Arctic Anthropology, 2000. 37(1): p. 1-42.

1181. Morrison, D., Painted wooden plaques from the MacFarlane collection: The earliest Inuvialuit graphic art. Arctic, 2006. 59(4): p. 351-360.

1182. Morrison, R.I.G., Body transformations, condition, and survival in Red Knots Calidris canutus travelling to breed at Alert, Ellesmere Island, Canada. Ardea 2006. 94(3): p. 607-618.

1183. Morrison, R.I.G. and K.A. Hobson, Use of body stores in shorebirds after arrival on High-Arctic breeding grounds. Auk, 2004. 121(2): p. 333-344.

1184. Mosbech, A., et al., Year-round movements of Northern Common Eiders Somateria mollissima borealis breeding in Arctic Canada and West Greenland followed by satellite telemetry. Ardea, 2006. 94(3): p. 651-665.

1185. Moses, S.K., et al., Inorganic nutrients and contaminants in subsistence species of Alaska: linking wildlife and human health. Int J Circumpolar Health, 2009. 68(1): p. 53-74.

1186. Moses, S.K., et al., Organic nutrients and contaminants in subsistence species of Alaska: concentrations and relationship to food preparation method. Int J Circumpolar Health, 2009. 68(4): p. 354-71.

1187. Moshonkin, S.N., N.A. Diansky, and A.V. Gusev, Influence of the interaction between the Atlantic and the Arctic Ocean on the Gulf Stream. Oceanology, 2007. 47(2): p. 178-190.

1188. Moss, M.L., Outer coast maritime adaptations in southern southeast Alaska: Tlingit or Haida? Arctic Anthropology, 2008. 45(1): p. 41-60.

1189. Mostajir, B., et al., Surface water distribution of pico- and nanophytoplankton in relation to two distinctive water masses in the North Water, northern Baffin Bay, during fall. Aquatic Microbial Ecology, 2001. 23(2): p. 205-212.

1190. Mountain, K.R.H.D.A.J.S.R., Spatial and temporal temperature change in the arctic basin since 1994: Assessment of localized short-term data sets. Polar Geography, 2001. 25(1): p. 1-21.

1191. Mountney, N.P. and A.J. Russell, Coastal aeolian dune development, Solheimasandur, southern Iceland. Sedimentary Geology, 2006. 192(3-4): p. 167-181.

1192. Mu, L.W.D.C.X., Changes in Atlantic Thermohaline Circulation under Different Atmospheric CO2 Scenarios in a Climate Model. Journal of China University of Geosciences, 2006. 17(4): p. 326-331.

1193. Mudie, P.J. and A. Rochon, Distribution of dinoflagellate cysts in the Canadian Arctic marine region. Journal of Quaternary Science, 2001. 16(7): p. 603-620.

1194. Mudie, P.J.R.A.P.M.A.S.D.T.S.R.L.E.S.D.B.R.L.K.A., Late Pleistocene-Holocene marine geology of Nares Strait region: Palaeoceanography from foraminifera and dinoflagellate cysts, sedimentology and stable isotopes. Polarforschung, 2004. 74(1): p. 169-183.

1195. Mueller, D.R., et al., Extremotrophs, extremophiles and broadband pigmentation strategies in a high arctic ice shelf ecosystem. FEMS Microbiol Ecol, 2005. 53(1): p. 73-87.

1196. Mueller, D.R., W.F. Vincent, and M.O. Jeffries, Break-up of the largest Arctic ice shelf and associated loss of an epishelf lake. Geophysical Research Letters, 2003. 30(20).

1197. Mueller, D.R.C.L.H.A.S.D., Examining Arctic ice shelves prior to the 2008 breakup. Eos, 2008. 89(49): p. 502-503.

1198. Mueller, D.R.V.W.F.J.M.O., Environmental gradients, fragmented habitats, and microbiota of a northern ice shelf cryoecosystem, Ellesmere Island, Canada. Arctic, Antarctic, and Alpine Research, 2006. 38(4): p. 593-607.

1199. Muggah, E., et al., Preterm delivery among Inuit women in the Baffin Region of the Canadian Arctic. Int J Circumpolar Health, 2004. 63 Suppl 2: p. 242-7.

1200. Muhs, D.R., K.R. Simmons, and B. Steinke, Timing and warmth of the Last Interglacial period: new U-series evidence from Hawaii and Bermuda and a new fossil compilation for North America. Quaternary Science Reviews, 2002. 21(12-13): p. 1355-1383.

1201. Muir, D., et al., Spatial and temporal trends of mercury and other metals in landlocked char from lakes in the Canadian Arctic archipelago. Science of the Total Environment, 2005. 351: p. 464-478.

1202. Muir, D.C.G., et al., Spatial Trends and Historical Deposition of Mercury in Eastern and Northern Canada Inferred from Lake Sediment Cores. Environmental Science & Technology, 2009. 43(13): p. 4802-4809.

1203. Muller, S., THE LOW DIAPENSIA LAPPONICA HEATHLAND OF SAINT-PIERRE AND MIQUELON ARCHIPELAGO; ITS BIOLOGICAL SIGNIFICANCE. Revue D Ecologie-La Terre Et La Vie, 2008. 63(4): p. 391-396.

1204. Muller-Lorch, D.M.M.A.W.M.G., Na and K distribution in agpaitic pegmatites. Lithos, 2007. 95(3): p. 315-330.

1205. Munchow, A. and H. Melling, Ocean current observations from Nares Strait to the west of Greenland: Interannual to tidal variability and forcing. Journal of Marine Research, 2008. 66(6): p. 801-833.

1206. Munchow, A., H. Melling, and K.K. Falkner, An observational estimate of volume and freshwater flux leaving the arctic ocean through nares strait. Journal of Physical Oceanography, 2006. 36(11): p. 2025-2041.

1207. Munchow, A.F.K.K.M.H., Spatial continuity of measured seawater and tracer fluxes through Nares Strait, a dynamically wide channel bordering the Canadian Archipelago. Journal of Marine Research, 2007. 65(6): p. 759-788.

1208. Mundy, C.J., D.G. Barber, and C. Michel, Variability of snow and ice thermal, physical and optical properties pertinent to sea ice algae biomass during spring. Journal of Marine Systems, 2005. 58(3-4): p. 107-120.

1209. Mundy, C.J., et al., Linking ice structure and microscale variability of algal biomass in Arctic first-year sea ice using an in situ photographic technique. Polar Biology, 2007. 30(9): p. 1099-1114.

1210. Mundy, C.J., et al., Influence of snow cover and algae on the spectral dependence of transmitted irradiance through Arctic landfast first-year sea ice. Journal of Geophysical Research-Oceans, 2007. 112(C3).

1211. Mundy, C.J., et al., Contribution of under-ice primary production to an ice-edge upwelling phytoplankton bloom in the Canadian Beaufort Sea. Geophysical Research Letters, 2009. 36.

1212. Mundy, C.J., et al., Riverine export and the effects of circulation on dissolved organic carbon in the Hudson Bay system, Canada. Limnology and Oceanography, 2010. 55(1): p. 315-323.

1213. Munroe, J.S. and J.G. Bockheim, Soil development in low-arctic tundra of the northern Brooks Range, Alaska, USA. Arctic Antarctic and Alpine Research, 2001. 33(1): p. 78-87.

1214. Murray, A.M.C.S.L.H.C.R.R.N.S.G.R., Early Pliocene fish remains from Arctic Canada support a pre-Pleistocene dispersal of percids (Teleostei: Perciformes). Canadian Journal of Earth Sciences, 2009. 46(7): p. 557-570.

1215. Myers, H.F.S., Making change: Economic development in Pond Inlet, 1987 to 1997. Arctic, 2000. 53(2): p. 134-145.

1216. Myers, J.S.V.R.J.T.T.A., Proterozoic anorthosite-granite Nain batholith: Structure and intrusion processes in an active lithosphere-scale fault zone, northern Labrador. Canadian Journal of Earth Sciences, 2008. 45(8): p. 909-934.

1217. Myers, P.G., Impact of freshwater from the Canadian Arctic Archipelago on Labrador Sea Water formation. Geophysical Research Letters, 2005. 32(6).

1218. Myers, P.G., C. Donnelly, and M.H. Ribergaard, Structure and variability of the West Greenland Current in Summer derived from 6 repeat standard sections. Progress in Oceanography, 2009. 80(1-2): p. 93-112.

1219. Myers, P.G., et al., Interdecadal variability in Labrador Sea precipitation minus evaporation and salinity. Progress in Oceanography, 2007. 73(3-4): p. 341-357.

1220. Myers, P.G.K.N.R.M.H., Irminger water variability in the West Greenland Current. Geophysical Research Letters, 2007. 34(17).

1221. Myhre, P.I.C.F.A.A., Caledonian anatexis of grenvillian crust: A U/Pb study of Albert I Land, NW Svalbard. Norsk Geologisk Tidsskrift, 2009. 89(3): p. 173-191.

1222. Narukawa, M.K.K.A.K.G.B.L.A., Fine and coarse modes of dicarboxylic acids in the Arctic aerosols collected during the Polar Sunrise Experiment 1997. Journal of Geophysical Research D: Atmospheres, 2003. 108(18): p. 3-1.

1223. Nathan, W.G.S.A.R.T.B.J.L.R.D.C.H.C.J.P.K.J.J.P.C.B.A.L., Foraging behaviours and diets of wolves in the queen maud gulf bird sanctuary, Nunavut, Canada. Arctic, 2009. 62(4): p. 399-404.

1224. Nazarenko, L., N. Tausnev, and J. Hansen, The North Atlantic thermohaline circulation simulated by the GISS climate model during 1970-99. Atmosphere-Ocean, 2007. 45(2): p. 81-92.

1225. Neben, S.D.V.T.F.B.T., New multi-channel seismic reflection data from Northwater Bay, Nares Strait: Indications for pull-apart tectonics. Polarforschung, 2004. 74(1): p. 77-96.

1226. Nelson, D.E. and R. McGhee, Aberrant radiocarbon dates on an Inuit arrowhead. Arctic, 2002. 55(4): p. 345-347.

1227. Nesje, A., S.O. Dahl, and J. Bakke, Were abrupt Lateglacial and early-Holocene climatic changes in northwest Europe linked to freshwater outbursts to the North Atlantic and Arctic Oceans? Holocene, 2004. 14(2): p. 299-310.

1228. Neta, T.C.Q.H.B.B.R.L., Upscaling reflectance information of lichens and mosses using a singularity index: A case study of the Hudson Bay Lowlands, Canada. Biogeosciences Discussions, 2010. 7(3): p. 3551-3578.

1229. Newton, S.T., H. Fast, and T. Henley, Sustainable development for Canada's Arctic and Subarctic communities: A backcasting approach to Churchill, Manitoba. Arctic, 2002. 55(3): p. 281-290.

1230. Ng, S.L. and R.H. King, Geochemistry of lake sediments as a record of environmental change in a high arctic watershed. Chemie Der Erde-Geochemistry, 2004. 64(3): p. 257-275.

1231. Ngai, J.T. and R.L. Jefferies, Nutrient limitation of plant growth and forage quality in Arctic coastal marshes. Journal of Ecology, 2004. 92(6): p. 1001-1010.

1232. Nguyen, D., et al., Tuberculosis in the Inuit community of Quebec, Canada. American Journal of Respiratory and Critical Care Medicine, 2003. 168(11): p. 1353-1357.

1233. Nguyen, H.T., et al., A Review of Atmospheric Mercury in the Polar Environment. Critical Reviews in Environmental Science and Technology, 2009. 39(7): p. 552-584.

1234. Nguyen, L.P., K.F. Abraham, and E. Nol, Influence of Arctic Terns on survival of artificial and natural Semipalmated Plover nests. Waterbirds, 2006. 29(1): p. 100-104.

1235. Nguyen, L.P., E. Nol, and K.F. Abraham, Nest success and habitat selection of the semipalmated plover on Akimiski Island, Nunavut. Wilson Bulletin, 2003. 115(3): p. 285-291.

1236. Nichols, T., et al., Climate change and sea ice: Local observations from the Canadian Western Arctic. Arctic, 2004. 57(1): p. 68-79.

1237. Niehoff, B., et al., Reproductive cycles of three dominant Calanus species in Disko Bay, West Greenland. Marine Biology, 2002. 140(3): p. 567-576.

1238. Nielsen, M.R., Is climate change causing the increasing narwhal (Monodon monoceros) catches in Smith Sound, Greenland? Polar Research, 2009. 28(2): p. 238-245.

1239. Nielsen, O., A. Clavijo, and J.A. Boughen, Serologic evidence of influenza A infection in marine mammals of Arctic Canada. Journal of Wildlife Diseases, 2001. 37(4): p. 820-825.

1240. Nielsen, O., et al., A morbillivirus antibody survey of Atlantic walrus, Narwhal and Beluga in Canada. Journal of Wildlife Diseases, 2000. 36(3): p. 508-517.

1241. Nielsen, O., et al., Serologic survey of Brucella spp. antibodies in some marine mammals of North America. Journal of Wildlife Diseases, 2001. 37(1): p. 89-100.

1242. Nishi, Y. and S. Tabeta, Analysis of the contribution of ice algae to the ice-covered ecosystem in Lake Saroma by means of a coupled ice-ocean ecosystem model. Journal of Marine Systems, 2005. 55(3-4): p. 249-270.

1243. Niwranski, K., P.G. Kevan, and A. Fjellberg, Effects of vehicle disturbance and soil compaction on Arctic collembolan abundance and diversity on Igloolik Island, Nunavut, Canada. European Journal of Soil Biology, 2002. 38(2): p. 193-196.

1244. Noble, P.J.L.A.C., Upper Wenlock Ceratoikiscidae (Radiolaria) from the Cape Phillips Formation, Arctic Canada. Journal of Paleontology, 2007. 81(5): p. 1044-1052.

1245. Norgaard-Pedersen, N., N. Mikkelsen, and Y. Kristoffersen, Arctic Ocean record of last two glacial-interglacial cycles off North Greenland/Ellesmere Island - Implications for glacial history. Marine Geology, 2007. 244(1-4): p. 93-108.

1246. Nornberg, T., M.E. Goodsite, and W. Shotyk, An improved motorized corer and sample processing system for frozen peat. Arctic, 2004. 57(3): p. 242-246.

1247. Nozais, C., et al., Abundance, biomass, composition and grazing impact of the sea-ice meiofauna in the North Water, northern Baffin Bay. Marine Ecology-Progress Series, 2001. 217: p. 235-250.

1248. Nutman, A.P., et al., Palaeoproterozoic and Archaean gneiss complexes in northern Greenland: Palaeoproterozoic terrane assembly in the High Arctic. Precambrian Research, 2008. 161(3-4): p. 419-451.

1249. O Cofaigh, C. and J.A. Dowdeswell, Laminated sediments in glacimarine environments: diagnostic criteria for their interpretation. Quaternary Science Reviews, 2001. 20(13): p. 1411-1436.

1250. O Cofaigh, C., et al., Timing and significance of glacially influenced mass-wasting in the submarine channels of the Greenland Basin. Marine Geology, 2004. 207(1-4): p. 39-54.

1251. O, P.C., P.M. Kotanen, and K.F. Abraham, Survival and growth of the forage grass Festuca rubra in naturally and artificially devegetated sites in a sub-arctic coastal marsh. Ecoscience, 2005. 12(2): p. 279-285.

1252. Oakey, G.N. and R. Stephenson, Crustal structure of the Innuitian region of Arctic Canada and Greenland from gravity modelling: implications for the Palaeogene Eurekan orogen. Geophysical Journal International, 2008. 173(3): p. 1039-1063.

1253. Oakey, G.N.D.D., Continuity of basement structures and dyke swarms in the Kane Basin region of central Nares Strait constrained by aeromagnetic data. Polarforschung, 2004. 74(1): p. 51-62.

1254. Obbard, R.W., et al., Frost flower surface area and chemistry as a function of salinity and temperature. Journal of Geophysical Research-Atmospheres, 2009. 114.

1255. Oberbauer, S.F.K.A.E.E.T.C.E.W.J.M.F.J.T.H.G.H.R.W.P.J.H., Tundra CO2 fluxes in response to experimental warming across latitudinal and moisture gradients. Ecological Monographs, 2007. 77(2): p. 221-238.

1256. O'Brien, D.M., et al., Red blood cell delta15N: a novel biomarker of dietary eicosapentaenoic acid and docosahexaenoic acid intake. Am J Clin Nutr, 2009. 89(3): p. 913-9.

1257. O'Connel, M.F.D.J.B.P.M., Ecology and trophic relationships of the fishes of Gander Lake, a large, deep, oligotrophic lake in Newfoundland, Canada. International Review of Hydrobiology, 2005. 90(5): p. 486-510.

1258. O'Connell, M.F.D.J.B., The biology of Arctic charr, Salvelinus alpinus, of Gander Lake, a large, deep, oligotrophic lake in Newfoundland, Canada. Environmental Biology of Fishes, 2002. 64(1-3): p. 115-126.

1259. O'Corry-Crowe, G., Climate change and the molecular ecology of arctic marine mammals. Ecological Applications, 2008. 18(2): p. S56-S76.

1260. O'Donnell, J., Polar hysteria: an expression of hypervitaminosis A. Am J Ther, 2004. 11(6): p. 507-16.

1261. Ogawa, R.H.K., On the non-seasonal gravity changes from GRACE and velocities of GPS stations. Journal of the Geodetic Society of Japan, 2006. 52(4): p. 297-308.

1262. Oiffer, L.S.S.D., Methyl mercury production and loss in Arctic soil. Science of the Total Environment, 2009. 407(5): p. 1691-1700.

1263. Oka, A.H.H.O.N.S.T.T.S.T., Deep convection seesaw controlled by freshwater transport through the Denmark Strait. Ocean Modelling, 2006. 15(3): p. 157-176.

1264. Omelon, C.R., W.H. Pollard, and F.G. Ferris, Environmental controls on microbial colonization of high Arctic cryptoendolithic habitats. Polar Biology, 2006. 30(1): p. 19-29.

1265. Omelon, C.R.P.W.H.A.D.T., A geochemical evaluation of perennial spring activity and associated mineral precipitates at Expedition Fjord, Axel Heiberg Island, Canadian High Arctic. Applied Geochemistry, 2006. 21(1): p. 1-15.

1266. Ommanney, C.S.L., History of glacier investigations in Canada. US Geological Survey Professional Paper n1386 J, 1386. 12(01): p. J27-J82.

1267. O'Neill, N.T., et al., Occurrence of weak, sub-micron, tropospheric aerosol events at high Arctic latitudes. Geophysical Research Letters, 2008. 35(14).

1268. Oosten, J. and F. Laugrand, The bringer of light: the raven in Inuit tradition. Polar Record, 2006. 42(222): p. 187-204.

1269. Ormsby, A.B.J.H.E.L.Y.K.S., Quantitation of endorhizal fungi in High Arctic tundra ecosystems through space and time: The value of herbarium archives. Canadian Journal of Botany, 2007. 85(7): p. 599-606.

1270. Orona, R., Army dental assistants perform in Operation Arctic Care. Dent Assist, 2005. 74(4): p. 36-7.

1271. Orr, P., et al., Bronchiolitis in Inuit children from a Canadian central arctic community, 1995-1996. Int J Circumpolar Health, 2001. 60(4): p. 649-58.

1272. Orre, S., et al., Simulating transport of I-129 and idealized tracers in the northern North Atlantic Ocean. Environmental Fluid Mechanics, 2010. 10(1-2): p. 213-233.

1273. Osinski, G.R.L.P., Intra-crater sedimentary deposits at the Haughton impact structure, Devon Island, Canadian High Arctic. Meteoritics and Planetary Science, 2005. 40(12): p. 1887-1899.

1274. Osinski, G.R.L.P.P.J.B.M.S.J.G., A case study of impact-induced hydrothermal activity: The Haughton impact structure, Devon Island, Canadian High Arctic. Meteoritics and Planetary Science, 2005. 40(12): p. 1859-1877.

1275. Osinski, G.R.S.J.G., Tectonics of complex crater formation as revealed by the Haughton impact structure, Devon Island, Canadian High Arctic. Meteoritics and Planetary Science, 2005. 40(12): p. 1813-1834.

1276. Osinski, G.R.S.J.G.L.P., Impactites of the Haughton impact structure, Devon Island, Canadian High Arctic. Meteoritics and Planetary Science, 2005. 40(12): p. 1789-1812.

1277. Osinski, G.R.S.J.G.L.P.P.J.L.D.S.S.G.B.B.T.E.C.C.S., Geological overview and cratering model for the Haughton impact structure, Devon Island, Canadian High Arctic. Meteoritics and Planetary Science, 2005. 40(12): p. 1759-1776.

1278. Osterberg, E.C.M.P.K.K.H.M.S.S.F.D.Z.C.Z.J.D.M.B.J.W.M., Ice core record of rising lead pollution in the North Pacific atmosphere. Geophysical Research Letters, 2008. 35(5).

1279. Ostertag, S.K., et al., Estimated dietary exposure to fluorinated compounds from traditional foods among Inuit in Nunavut, Canada. Chemosphere, 2009. 75(9): p. 1165-1172.

1280. Oswald, W.W., et al., Effects of sample mass and macrofossil type on radiocarbon dating of arctic and boreal lake sediments. Holocene, 2005. 15(5): p. 758-767.

1281. Otieno, F.O. and D.H. Bromwich, Contribution of Atmospheric Circulation to Inception of the Laurentide Ice Sheet at 116 kyr BP. Journal of Climate, 2009. 22(1): p. 39-57.

1282. Outridge, P.M., et al., Investigation of the stock structure of Atlantic walrus (Odobenus rosmarus rosmarus) in Canada and Greenland using dental Pb isotopes derived from local geochemical environments. Arctic, 2003. 56(1): p. 82-90.

1283. Outridge, P.M., M.H. Hermanson, and W.L. Lockhart, Regional variations in atmospheric deposition and sources of anthropogenic lead in lake sediments across the Canadian Arctic. Geochimica Et Cosmochimica Acta, 2002. 66(20): p. 3521-3531.

1284. Outridge, P.M., et al., A comparison of modern and preindustrial levels of mercury in the teeth of beluga in the Mackenzie Delta, Northwest Territories, and walrus at Igloolik, Nunavut, Canada. Arctic, 2002. 55(2): p. 123-132.

1285. Outridge, P.M., K.A. Hobson, and J. Savelle, Long-term changes of mercury levels in ringed seal (Phoca hispida) from Amundsen Gulf, and beluga (Delphinapterus leucas) from the Beaufort Sea, western Canadian Arctic. Sci Total Environ, 2009. 407(23): p. 6044-51.

1286. Outridge, P.M.H.K.A.S.J.M., Changes in mercury and cadmium concentrations and the feeding behaviour of beluga (Delphinapterus leucas) near Somerset Island, Canada, during the 20th century. Science of the Total Environment, 2005. 350(1): p. 106-118.

1287. Overland, J.E., et al., Seasonal and regional variation of pan-Arctic surface air temperature over the instrumental record. Journal of Climate, 2004. 17(17): p. 3263-3282.

1288. Overland, J.E. and M.Y. Wang, The third Arctic climate pattern: 1930s and early 2000s. Geophysical Research Letters, 2005. 32(23).

1289. Paasche, O., et al., Weathering characteristics of arctic islands in northern Norway. Geomorphology, 2006. 82(3-4): p. 430-452.

1290. Pacheco-Oliver, M., et al., Detection of methanotrophs with highly divergent pmoA genes from Arctic soils. Fems Microbiology Letters, 2002. 209(2): p. 313-319.

1291. Padman, L. and S. Erofeeva, A barotropic inverse tidal model for the Arctic Ocean. Geophysical Research Letters, 2004. 31(2).

1292. Palmer, C.T.W.R.L., Local environmental knowledge, talk, and skepticism: Using 'LES' to distinguish 'LEK' from 'LET' in Newfoundland. Human Ecology, 2007. 35(6): p. 749-760.

1293. Palo, J.U., et al., Microsatellite variation in ringed seals (Phoca hispida): genetic structure and history of the Baltic Sea population. Heredity, 2001. 86(Pt 5): p. 609-17.

1294. Palsson, G. and A. Helgason, Blondes, lost and found: representations of genes, identity, and history. Dev World Bioeth, 2003. 3(2): p. 159-69.

1295. Park, R.W. and D.R. Stenton, A Hans Kruger Arctic expedition cache on Axel Heiberg Island, Nunavut. Arctic, 2007. 60(1): p. 1-6.

1296. Parkinson, C.L., Variability of Arctic sea ice: The view from space, an 18-year record. Arctic, 2000. 53(4): p. 341-358.

1297. Parkinson, C.L. and D.J. Cavalieri, Arctic sea ice variability and trends, 1979-2006. Journal of Geophysical Research-Oceans, 2008. 113(C7).

1298. Parkinson, C.L., K.Y. Vinnikov, and D.J. Cavalieri, Evaluation of the simulation of the annual cycle of Arctic and Antarctic sea ice coverages by 11 major global climate models. Journal of Geophysical Research-Oceans, 2006. 111(C7).

1299. Parkinson, C.L.C.D.J., A 21 year record of Arctic seas-ice extents and their regional, seasonal and monthly variability and trends. Annals of Glaciology Papers from the Fourth International Symposium on Remote Sensing in Glaciology held in Colleg Park, Maryland, USA, 2001. 34: p. 441-446.

1300. Parnell, J., et al., Biomarker determination as a provenance tool for detrital carbonate events (Heinrich events?): Fingerprinting Quaternary glacial sources into Baffin Bay. Earth and Planetary Science Letters, 2007. 257(1-2): p. 71-82.

1301. Parnell, J., et al., The transfer of organic signatures from bedrock to sediment. Chemical Geology, 2008. 247(1-2): p. 242-252.

1302. Parnell, J., et al., Organic geochemistry of impactites from the Haughton impact structure, Devon Island, Nunavut, Canada. Geochimica Et Cosmochimica Acta, 2007. 71(7): p. 1800-1819.

1303. Pars, T.O.M.B.P., Contemporary use of traditional and imported food among Greenlandic Inuit. Arctic, 2001. 54(1): p. 22-31.

1304. Patchett, P.J.I.C.E.R.E.J.S.G.O.E.A.F.R.G.M.B.B.H.J.C.M., Sedimentary cover of the Canadian shield through mesozoic time reflected by Nd isotopic and geochemical results for the Sverdrup Basin, Arctic Canada. Journal of Geology, 2004. 112(1): p. 39-57.

1305. Patrick, D., Language rights in indigenous communities: The case of the Inuit of Arctic Quebec. Journal of Sociolinguistics, 2005. 9(3): p. 369-389.

1306. Patterson, B.R., B.T. Olsen, and D.O. Joly, Population estimate for the Bluenose-East caribou herd using post-calving photography. Arctic, 2004. 57(1): p. 47-58.

1307. Paudyn, K.K.R.R.R.A.P.J.S., Remediation of hydrocarbon contaminated soils in the Canadian Arctic by landfarming. Cold Regions Science and Technology, 2008. 53(1): p. 102-114.

1308. Paul, C.A., K.M. Ruhland, and J.P. Smol, Diatom-inferred climatic and environmental changes over the last similar to 9000 years from a low Arctic (Nunavut, Canada) tundra lake. Palaeogeography Palaeoclimatology Palaeoecology, 2010. 291(3-4): p. 205-216.

1309. Paul, F.K.A., Perspectives on the production of a glacier inventory from multispectral satellite data in Arctic Canada: Cumberland Peninsula, Baffin Island. Annals of Glaciology, 2005. 42: p. 59-66.

1310. Paull, T.M., et al., Numerical analysis of small Arctic diatoms (Bacillariophyceae) representing the Staurosira and Staurosirella species complexes. Phycologia, 2008. 47(2): p. 213-224.

1311. Payette, S., et al., Long-term interactions between migratory caribou, wildfires and nunavik hunters inferred from tree rings. Ambio, 2004. 33(8): p. 482-486.

1312. Payette, S., M. Eronen, and J.J.P. Jasinski, The circumboreal tundra-taiga interface: Late Pleistocene and Holocene changes. Ambio, 2002: p. 15-22.

1313. Peach, D., et al., Impact of recurrent epidemics of hepatitis a virus infection on population immunity levels: Bristol Bay, Alaska. J Infect Dis, 2002. 186(8): p. 1081-5.

1314. Pearce, T., et al., Inuit vulnerability and adaptive capacity to climate change in Ulukhaktok, Northwest Territories, Canada. Polar Record, 2010. 46(237): p. 157-177.

1315. Pedersen, P.M., B.L. Siemer, and R.T. Wilce, Field and culture observations on Coelocladia arctica (Fucophyceae): growth and reproduction in relation to temperature. Phycologia, 2000. 39(5): p. 429-434.

1316. Pedersen, S. and S. Lierhagen, Heavy metal accumulation in arctic hares (Lepus arcticus) in Nunavut, Canada. Science of the Total Environment, 2006. 368(2-3): p. 951-955.

1317. Peplinski, L.O.S., Point de vue inuit concernant la terre Translated Title: Inuit perspectives on the land. Geomatica 2008. 62(2): p. 159-168.

1318. Pereg, D., et al., Environmental exposure to polychlorinated biphenyls and placental CYP1A1 activity in Inuit women from northern Quebec. Environmental Health Perspectives, 2002. 110(6): p. 607-612.

1319. Perkins, D.E., P.A. Smith, and H.G. Gilchrist, The breeding ecology of ruddy turnstones (Arenaria interpres) in the eastern Canadian Arctic. Polar Record, 2007. 43(225): p. 135-142.

1320. Peros, M., et al., Multi-proxy record of postglacial environmental change, south-central Melville Island, Northwest Territories, Canada. Quaternary Research, 2010. 73(2): p. 247-258.

1321. Peros, M.C. and K. Gajewski, Pollen-based reconstructions of late Holocene climate from the central and western Canadian Arctic. Journal of Paleolimnology, 2009. 41(1): p. 161-175.

1322. Perreault, N.N.W.L.G.G.C.W.A.D.T.P.W.H., Characterization of the prokaryotic diversity in cold saline perennial springs of the Canadian high arctic. Applied and Environmental Microbiology, 2007. 73(5): p. 1532-1543.

1323. Perreault, N.N.W.L.G.G.C.W.A.D.T.T.S.L.-C.G.L.B.S., Heterotrophic and autotrophic microbial populations in cold perennial springs of the high arctic. Applied and Environmental Microbiology, 2008. 74(22): p. 6898-6907.

1324. Perren, B.B., R.S. Bradley, and P. Francus, Rapid lacustrine response to recent High Arctic warming: A diatom record from Sawtooth Lake, Ellesmere Island, Nunavut. Arctic Antarctic and Alpine Research, 2003. 35(3): p. 271-278.

1325. Peters, K.E.V.Z.C.R.L.S.Z.J.E.S.C.R., Restoration of Circum-Arctic Upper Jurassic source rock paleolatitude based on crude oil geochemistry. Organic Geochemistry, 2008. 39(8): p. 1189-1196.

1326. Petersen, K.M., R.J. Singleton, and L. Leonard, A qualitative study of the importance and etiology of chronic respiratory disease in Alaska native children. Alaska Med, 2003. 45(1): p. 14-20.

1327. Peterson, A.T., B.W. Benz, and M. Papes, Highly pathogenic H5N1 avian influenza: entry pathways into North America via bird migration. Plos One, 2007. 2(2): p. e261.

1328. Petrie, B., Does the North Atlantic oscillation affect hydrographic properties on the Canadian Atlantic continental shelf? Atmosphere-Ocean, 2007. 45(3): p. 141-151.

1329. Petrie, S.A. and K.L. Wilcox, Migration chronology of Eastern-Population Tundra Swans. Canadian Journal of Zoology-Revue Canadienne De Zoologie, 2003. 81(5): p. 861-870.

1330. Petrov, A.N., Talent in the cold? Creative capital and the economic future of the Canadian north. Arctic, 2008. 61(2): p. 162-176.

1331. Peyron, O. and A. De Vernal, Application of artificial neural networks (ANN) to high-latitude dinocyst assemblages for the reconstruction of past sea-surface conditions in Arctic and sub-Arctic seas. Journal of Quaternary Science, 2001. 16(7): p. 699-709.

1332. Pfeffer, W.T., Ice dynamics modelling of the Hudson Strait region at late galcial time. Bulletin of the Geological Survey of Canada Marine Geology of Hudson Strait and Ungava Bay, Eastern Arctic Canada: Late Quarternary Sediments, Depositional Environments, and Late Glacia Deglacial History Derived from Marine Terrestrial Studies n566, 2001. 05(01): p. 171-179.

1333. Phillips, W.M., et al., Cosmogenic Be-10 and Al-26 exposure ages of tors and erratics, Cairngorm Mountains, Scotland: Timescales for the development of a classic landscape of selective linear glacial erosion. Geomorphology, 2006. 73(3-4): p. 222-245.

1334. Pickavance, J.R., The spiders of East Bay, Southampton Island, Nunavut, Canada. Arctic, 2006. 59(3): p. 276-282.

1335. Piepenburg, D., Arctic brittle stars (Echinodermata : Ophiuroidea), in Oceanography and Marine Biology, Vol 38. 2000. p. 189-256.

1336. Piepjohn, K., et al., Origin of iron-oxide and silicate melt rocks in paleogene sediments of southern ellesmere island, Canadian arctic archipelago, Nunavut. Canadian Journal of Earth Sciences, 2007. 44(7): p. 1005-1013.

1337. Piepjohn, K., et al., Deciphering superimposed Ellesmerian and Eurekan deformation, Piper Pass area, northern Ellesmere Island (Nunavut). Canadian Journal of Earth Sciences, 2007. 44(10): p. 1439-1452.

1338. Pier, M.D., et al., Redistribution of polychlorinated biphenyls from a local point source: Terrestrial soil, freshwater sediment, and vascular plants as indicators of the halo effect. Arctic Antarctic and Alpine Research, 2003. 35(3): p. 349-360.

1339. Piwowar, J.M.D.C.P., Spatial-temporal variability of Northern Hemisphere sea ice concentrations and concurrent atmospheric teleconnections. Journal of Environmental Informatics, 2008. 11(2): p. 103-122.

1340. Plumet, P., The Far North and Religion. Anthropologie, 2006. 110(3): p. 383-400.

1341. Plusquellec, P., et al., The relation of environmental contaminants exposure to behavioral indicators in Inuit preschoolers in Arctic Quebec. Neurotoxicology, 2010. 31(1): p. 17-25.

1342. Plusquellec, P., et al., The relation of low-level prenatal lead exposure to behavioral indicators of attention in Inuit infants in Arctic Quebec. Neurotoxicology and Teratology, 2007. 29(5): p. 527-537.

1343. Podolsky, G., Working in Canada's subarctic: circumpolar medicine. Wilderness Environ Med, 2006. 17(1): p. 52-5.

1344. Podritske, B. and K. Gajewski, Diatom community response to multiple scales of Holocene climate variability in a small lake on Victoria Island, NWT, Canada. Quaternary Science Reviews, 2007. 26(25-28): p. 3179-3196.

1345. Pohler, D., et al., Observation of halogen species in the Amundsen Gulf, Arctic, by active long-path differential optical absorption spectroscopy. Proc Natl Acad Sci U S A, 2010. 107(15): p. 6582-7.

1346. Poland, J.S.R.A.M.S., Remediation of former military bases in the Canadian Arctic. Cold Regions Science and Technology, 2001. 32(2): p. 93-105.

1347. Pollard, W.H., Ground-ice aggradation on Fosheim Peninsula, Ellesmere Island, Nunavut. Bulletin of the Geological Survey of Canada Environmental response to Climatic change in the Canadian High Arctic n529, 2000. 12(01): p. 325-333.

1348. Pollard, W.H., Distribution and characterization of ground ice on Fosheim Peninsula, Ellesmere Island, Nunavut. Bulletin of the Geological Survey of Canada Environmental response to Climatic change in the Canadian High Arctic n529, 2000. 12(01): p. 207-233.

1349. Pollard, W.H., Icing processes associated with high Arctic perennial springs, Axel Heiberg Island, Nunavut, Canada. Permafrost and Periglacial Processes, 2005. 16(1): p. 51-68.

1350. Poltermann, M., Arctic sea ice as feeding ground for amphipods - food sources and strategies. Polar Biology, 2001. 24(2): p. 89-96.

1351. Polyakov, I.V., et al., Variability of the intermediate Atlantic water of the Arctic Ocean over the last 100 years. Journal of Climate, 2004. 17(23): p. 4485-4497.

1352. Poore, A.G., et al., Contact and the personal/group discrimination discrepancy in an Inuit community. Journal of Psychology, 2002. 136(4): p. 371-382.

1353. Porinchu, D., G. MacDonald, and N. Rolland, A 2000 year midge-based paleotemperature reconstruction from the Canadian Arctic archipelago. Journal of Paleolimnology, 2009. 41(1): p. 177-188.

1354. Portnyagin, Y.I., et al., Monthly mean climatology of the prevailing winds and tides in the Arctic mesosphere/lower thermosphere. Annales Geophysicae, 2004. 22(10): p. 3395-3410.

1355. Potter, P., I am but mad North-northwest: when the wind is southerly I know a hawk from a handsaw. Emerg Infect Dis, 2008. 14(1): p. 189-91.

1356. Poulain, A.J., et al., Mercury distribution, partitioning and speciation in coastal vs. inland High Arctic snow. Geochimica Et Cosmochimica Acta, 2007. 71(14): p. 3419-3431.

1357. Poulain, A.J., et al., Redox transformations of mercury in an Arctic snowpack at springtime. Atmospheric Environment, 2004. 38(39): p. 6763-6774.

1358. Pouliot, R.R.L.G.G., Moss carpets constrain the fertilizing effects of herbivores on graminoid plants in arctic polygon fens. Botany, 2009. 87(12): p. 1209-1222.

1359. Powell, B.D., The memorials on Beechey Island, Nunavut, Canada: an historical and pictorial survey. Polar Record, 2006. 42(223): p. 325-333.

1360. Power, M., et al., Mercury accumulation in the fish community of a sub-Arctic lake in relation to trophic position and carbon sources. Journal of Applied Ecology, 2002. 39(5): p. 819-830.

1361. Power, M.O.C.M.F.D.J.B., Ecological segregation within and among Arctic char morphotypesin Gander Lake, Newfoundland. Environmental Biology of Fishes, 2005. 73(3): p. 263-274.

1362. Praebel, K.W.J.I.F.S.E.C.J.S., Circumpolar genetic population structure of capelin Mallotus villosus. Marine Ecology Progress Series, 2008. 360: p. 187-199.

1363. Prange, M.L.G., Effects of mid-Holocene river runoff on the Arctic ocean/sea-ice system: A numerical model study. Holocene, 2003. 13(3): p. 335-342.

1364. Prince, R.C., E.H. Owens, and G.A. Sergy, Weathering of an Arctic oil spill over 20 years: the BIOS experiment revisited. Marine Pollution Bulletin, 2002. 44(11): p. 1236-1242.

1365. Prinsenberg, S.J.H.J., Monitoring the volume, freshwater and heat fluxes passing through Lancaster Sound in the Canadian Arctic Archipelago. Atmosphere Ocean, 2005. 43(1): p. 1-22.

1366. Prinsenberg, S.P.R., Ice and ocean mooring data statistics from barrow strait, central section of NW passage in canadian arctic archipelago. International Journal of Offshore and Polar Engineering, 2008. 18(4): p. 277-281.

1367. Prokopowicz, A.F.L., Population structure of three dominant Calanus species in North Water Polynya, Baffin Bay. Polish Polar Research, 2002. 23(3): p. 241-252.

1368. Proshutinsky, A., et al., Beaufort Gyre freshwater reservoir: State and variability from observations. Journal of Geophysical Research-Oceans, 2009. 114.

1369. Proulx, J.F., et al., Pneumonia epidemic caused by a virulent strain of Streptococcus pneumoniae serotype 1 in Nunavik, Quebec. Canada Communicable Disease Report - Relevé des maladies transmissibles au Canada, 2002. 28(16): p. 129-131.

1370. Proulx, J.F., et al., Novel prevention program for trichinellosis in inuit communities. Clinical Infectious Diseases, 2002. 34(1): p. 1508-14.

1371. Przybylak, R. and Z. Vizi, Air temperature changes in the Canadian Arctic from the early instrumental period to modern times. International Journal of Climatology, 2005. 25(11): p. 1507-1522.

1372. Putkonen, J., J. Connolly, and T. Orloff, Landscape evolution degrades the geologic signature of past glaciations. Geomorphology, 2008. 97(1-2): p. 208-217.

1373. Putkonen, J. and T. Swanson, Accuracy of cosmogenic ages for moraines. Quaternary Research, 2003. 59(2): p. 255-261.

1374. Quijon, P.A. and P.V. Snelgrove, Predation regulation of sedimentary faunal structure: potential effects of a fishery-induced switch in predators in a Newfoundland sub-Arctic fjord. Oecologia, 2005. 144(1): p. 125-36.

1375. Quijon, P.A. and P.V.R. Snelgrove, Polychaete assemblages of a sub-arctic Newfoundland fjord: habitat, distribution, and identification. Polar Biology, 2005. 28(7): p. 495-505.

1376. Quijon, P.A.S.P.V.R., Spatial linkages between decapod planktonic and benthic adult stages in a Newfoundland fjordic system. Journal of Marine Research, 2005. 63(4): p. 841-862.

1377. Quijon, P.A.S.P.V.R., Differential regulatory roles of crustacean predators in a sub-arctic, soft-sediment system. Marine Ecology Progress Series, 2005. 285: p. 137-149.

1378. Quinn, P.K.S.G.A.E.D.E.G.R.-A.T.G.S.L., Arctic haze: Current trends and knowledge gaps. Tellus, Series B: Chemical and Physical Meteorology, 2007. 59(1): p. 99-114.

1379. Quinonez, C.R., A political economic history of medical and dental care in Nunavut, Canada. Int J Circumpolar Health, 2006. 65(2): p. 101-16.

1380. Racine, C., et al., Tundra fire and vegetation change along a hillslope on the Seward Peninsula, Alaska, USA. Arctic Antarctic and Alpine Research, 2004. 36(1): p. 1-10.

1381. Radi, T. and A. de Vernal, Dinocysts as proxy of primary productivity in mid-high latitudes of the Northern Hemisphere. Marine Micropaleontology, 2008. 68(1-2): p. 84-114.

1382. Radi, T.D.V.A., Last glacial maximum (LGM) primary productivity in the northern North Atlantic Ocean. Canadian Journal of Earth Sciences, 2008. 45(11): p. 1299-1316.

1383. Raper, S.C.B.B.R.J., Glacier volume response time and its links to climate and topography based on a conceptual model of Glacier hypsometry. Cryosphere Discussions, 2009. 3(1): p. 243-257.

1384. Rasmussen, T.L., et al., Millennial-scale glacial variability versus Holocene stability: changes in planktic and benthic foraminifera faunas and ocean circulation in the North Atlantic during the last 60 000 years. Marine Micropaleontology, 2003. 47(1-2): p. 143-176.

1385. Rattenbury, K., et al., A reindeer herder's perspective on caribou, weather and socio-economic change on the Seward Peninsula, Alaska. Polar Research, 2009. 28(1): p. 71-88.

1386. Ratz, H.J. and J. Lloret, Variation in fish condition between Atlantic cod (Gadus morhua) stocks, the effect on their productivity and management implications. Fisheries Research, 2003. 60(2-3): p. 369-380.

1387. Rautio, M. and W.F. Vincent, Benthic and pelagic food resources for zooplankton in shallow high-latitude lakes and ponds. Freshwater Biology, 2006. 51(6): p. 1038-1052.

1388. Ravoori, S., et al., DNA damage associated with PCBs in the whole blood cells of Inuit. Environmental Toxicology and Pharmacology, 2008. 25(2): p. 273-276.

1389. Ravoori, S., et al., Protective effects of selenium against DNA adduct formation in Inuit environmentally exposed to PCBs. Environment International, 2010. 36(8): p. 980-986.

1390. Rayback, S.A.H.G.H.R., Reconstruction of summer temperature for a Canadian high arctic site from retrospective analysis of the dwarf shrub, Cassiope tetragona. Arctic, Antarctic, and Alpine Research, 2006. 38(2): p. 228-238.

1391. Raymo, M.E., et al., Stability of North Atlantic water masses in face of pronounced climate variability during the Pleistocene. Paleoceanography, 2004. 19(2).

1392. Redfield, T.F., On apatite fission track dating and the Tertiary evolution of West Greenland topography. Journal of the Geological Society, 2010. 167(2): p. 261-271.

1393. Reed, A.H.R.J.B.H., Patterns of distribution and abundance of Greater Snow Geese on Bylot Island, Nunavut, Canada 1983-1998. Wildfowl, 2002. 53: p. 53-65.

1394. Reed, E.T.B.J.M.J.G.G.G.J.F., Molt migration in relation to breeding success in greater snow geese. Arctic, 2003. 56(1): p. 76-81.

1395. Rees, D.J., et al., Large genomes among caridean shrimp. Genome, 2008. 51(2): p. 159-63.

1396. Reeves, C.E.S.W.T.S.G.A.P.K.O.D.E.S.J.M.R.B.J.M.C.J., Trends of halon gases in polar firn air: Implications for their emission distributions. Atmospheric Chemistry and Physics, 2005. 5(8): p. 2055-2064.

1397. Reeves, R.R.C.S.E., Historical Population Characteristics of Bowhead Whales (Balaena mysticetus) in Hudson Bay. Arctic, 2003. 56(3): p. 283-292.

1398. Regehr, E.V., et al., Survival and breeding of polar bears in the southern Beaufort Sea in relation to sea ice. Journal of Animal Ecology, 2010. 79(1): p. 117-127.

1399. Reichard, M.V., et al., Prevalence of antibodies to Toxoplasma gondii in wolverines from Nunavut, Canada. J Parasitol, 2008. 94(3): p. 764-5.

1400. Reichard, M.V., et al., Trichinella T6 and Trichinella nativa in Wolverines (Gulo gulo) from Nunavut, Canada. Parasitology Research, 2008. 103(3): p. 657-661.

1401. Reid, C.J.N.P.K.T.K.B.B., Diagenetic cycling of nutrients in seafloor sediments and the carbonate-silica balance in a Paleozoic cool-water carbonate system, Sverdrup Basin, Canadian Arctic Archipelago. Journal of Sedimentary Research, 2008. 78(7): p. 562-578.

1402. Reid, C.M.J.N.P.K.T.K.B.B., Faunal turnover and changing oceanography: Late Palaeozoic warm-to-cool water carbonates, Sverdrup Basin, Canadian Arctic Archipelago. Palaeogeography, Palaeoclimatology, Palaeoecology, 2007. 249(1): p. 128-159.

1403. Reid, I.D.J.H.R.T.F., The Nares 2001 geoscience project: An introduction. Polarforschung, 2004. 74(1): p. 1-7.

1404. Reiter, M.E., C.W. Boal, and D.E. Andersen, Anurans in a Subarctic Tundra Landscape Near Cape Churchill, Manitoba. Canadian Field-Naturalist, 2008. 122(2): p. 129-137.

1405. Renaud, P.E., et al., Multidecadal stability of benthic community structure in a high-Arctic glacial fjord (van Mijenfjord, Spitsbergen). Polar Biology, 2007. 30(3): p. 295-305.

1406. Rennermalm, A.K., et al., Relative sensitivity of the Atlantic meridional overturning circulation to river discharge into Hudson Bay and the Arctic Ocean. Journal of Geophysical Research-Biogeosciences, 2007. 112(G4).

1407. Rennert, K.J.W.J.M., Cross-frequency coupling, skewness, and blocking in the northern hemisphere winter circulation. Journal of Climate, 2009. 22(21): p. 5650-5666.

1408. Renouf, M.A.P.B.T., Dorset Palaeoeskimo skin processing at Phillip's Garden, Port au Choix, northwestern Newfoundland. Arctic, 2008. 61(1): p. 35-47.

1409. Renssen, H., H. Goosse, and T. Fichefet, Contrasting trends in north Atlantic deep-water formation in the Labrador Sea and Nordic Seas during the Holocene. Geophysical Research Letters, 2005. 32(8).

1410. Renssen, H., et al., Simulating the Holocene climate evolution at northern high latitudes using a coupled atmosphere-sea ice-ocean-vegetation model. Climate Dynamics, 2005. 24(1): p. 23-43.

1411. Renssen, H.G.H.F.T., Simulation of Holocene cooling events in a coupled climate model. Quaternary Science Reviews, 2007. 26(15): p. 2019-2029.

1412. Retamal, L., et al., Comparison of the optical properties of dissolved organic matter in two river-influenced coastal regions of the Canadian Arctic. Estuarine Coastal and Shelf Science, 2007. 72(1-2): p. 261-272.

1413. Ricca, M.A., A.K. Miles, and R.G. Anthony, Sources of organochlorine contaminants and mercury in seabirds from the Aleutian archipelago of Alaska: inferences from spatial and trophic variation. Science of the Total Environment, 2008. 406(1-2): p. 308-323.

1414. Richard, P.R., et al., Summer and autumn movements and habitat use by belugas in the Canadian High Arctic and adjacent areas. Arctic, 2001. 54(3): p. 207-222.

1415. Richard, P.R., et al., Baffin Bay Narwhal Population Distribution and Numbers: Aerial Surveys in the Canadian High Arctic, 2002-04. Arctic, 2010. 63(1): p. 85-99.

1416. Richardson, E., I. Stirling, and D.S. Hik, Polar bear (Ursus maritimus) maternity denning habitat in western Hudson Bay: a bottom-up approach to resource selection functions. Canadian Journal of Zoology-Revue Canadienne De Zoologie, 2005. 83(6): p. 860-870.

1417. Richardson, E.S. and R.K. Brook, Excavation of an Arctic Fox, Alopex lagopus, den by a polar bear, Ursus maritimus. Canadian Field-Naturalist, 2004. 118(4): p. 602-603.

1418. Richefol, T., et al., Evolution of paleo sea-surface conditions over the last 600 years in the Mackenzie Trough, Beaufort Sea (Canada). Marine Micropaleontology, 2008. 68(1-2): p. 6-20.

1419. Richerol, T., et al., Distribution of dinoflagellate cysts in surface sediments of the Mackenzie Shelf and Amundsen Gulf, Beaufort Sea (Canada). Journal of Marine Systems, 2008. 74(3-4): p. 825-839.

1420. Richmond, C.A.M., THE SOCIAL DETERMINANTS OF INUIT HEALTH: A FOCUS ON SOCIAL SUPPORT IN THE CANADIAN ARCTIC. International Journal of Circumpolar Health, 2009. 68(5): p. 471-487.

1421. Ridley, B.A., et al., Ozone depletion events observed in the high latitude surface layer during the TOPSE aircraft program. Journal of Geophysical Research-Atmospheres, 2003. 108(D4).

1422. Ridley, B.A. and J.J. Orlando, Active nitrogen in surface ozone depletion events at alert during spring 1998. Journal of Atmospheric Chemistry, 2003. 44(1): p. 1-22.

1423. Ridley, B.A., et al., An ozone depletion event in the sub-arctic surface layer over Hudson Bay, Canada. Journal of Atmospheric Chemistry, 2007. 57(3): p. 255-280.

1424. Riedel, A., C. Michel, and M. Gosselin, Seasonal study of sea-ice exopolymeric substances on the Mackenzie shelf: implications for transport of sea-ice bacteria and algae. Aquatic Microbial Ecology, 2006. 45(2): p. 195-206.

1425. Riedel, A., et al., Winter-spring dynamics in sea-ice carbon cycling in the coastal Arctic Ocean. Journal of Marine Systems, 2008. 74(3-4): p. 918-932.

1426. Riedlinger, D. and F. Berkes, Contributions of traditional knowledge to understanding climate change in the Canadian Arctic. Polar Record, 2001. 37(203): p. 315-328.

1427. Rigby, J.K., et al., A new hexactinellid sponge from the cretaceous of Devon island, Canadian high arctic. Canadian Journal of Earth Sciences, 2007. 44(9): p. 1235-1242.

1428. Riget, F., et al., Transfer of mercury in the marine food web of West Greenland. Journal of Environmental Monitoring, 2007. 9(8): p. 877-883.

1429. Riget, F., J. Vikelsoe, and R. Dietz, Levels and temporal trends of PCDD/PCDFs and non-ortho PCBs in ringed seals from East Greenland. Marine Pollution Bulletin, 2005. 50(12): p. 1523-1529.

1430. Rikiishi, K.O.H.K.Y., The role of atmospheric circulation in the growth of sea-ice extent in marginal seas around the Arctic Ocean. Annals of Glaciology, 2005. 42: p. 352-360.

1431. Ringuette, M., et al., Advanced recruitment and accelerated population development in Arctic calanoid copepods of the North Water. Deep-Sea Research Part Ii-Topical Studies in Oceanography, 2002. 49(22-23): p. 5081-5099.

1432. Rinterknecht, V., et al., Preliminary Be-10 chronology for the last deglaciation of the western margin of the Greenland Ice Sheet. Journal of Quaternary Science, 2009. 24(3): p. 270-278.

1433. Robards, M., H.G. Gilchrist, and K. Allard, Breeding Atlantic Puffins, Fractercula arctica, and other bird species of Coburg Island, Nunavut. Canadian Field-Naturalist, 2000. 114(1): p. 72-77.

1434. Roberts, C.D., A.N. LeGrande, and A.K. Tripati, Climate sensitivity to Arctic seaway restriction during the early Paleogene. Earth and Planetary Science Letters, 2009. 286(3-4): p. 576-585.

1435. Robinson, S.D., Thaw-slump- derived thermokarst near Hot Weather Creek, Ellesmere Island, Nunavut. Bulletin of the Geological Survey of Canada Environmental response to Climatic change in the Canadian High Arctic n529, 2000. 12(01): p. 335-345.

1436. Rockwell, R.F., et al., Response of nesting savannah sparrows to 25 years of habitat change in a snow goose colony. Ecoscience, 2003. 10(1): p. 33-37.

1437. Rohr, T.S.A.T.D.H.E.A.F., Detrital zircon characteristics of the lower Cretaceous Isachsen formation, Sverdrup Basin: Source constraints from age and Hf isotope data. Canadian Journal of Earth Sciences, 2010. 47(3): p. 255-271.

1438. Rokkjaer, M.S., et al., Discharge diagnoses of liver diseases in Nuuk Greenland compared to a Danish county hospital. Int J Circumpolar Health, 2006. 65(2): p. 162-8.

1439. Rolland, N., et al., Holocene climate inferred from biological (Diptera : Chironomidae) analyses in a Southampton island (Nunavut, Canada) lake. Holocene, 2008. 18(2): p. 229-241.

1440. Rolland, N., et al., Evidence for a warmer period during the 12th and 13th centuries AD from chironomid assemblages in Southampton Island, Nunavut, Canada. Quaternary Research, 2009. 72(1): p. 27-37.

1441. Rollinson, H., Recognising early Archaean mantle: A reappraisal. Contributions to Mineralogy and Petrology, 2007. 154(3): p. 241-252.

1442. Rood, S.B., et al., Declining summer flows of Rocky Mountain rivers: Changing seasonal hydrology and probable impacts on floodplain forests. Journal of Hydrology, 2008. 349(3-4): p. 397-410.

1443. Rood, S.B., et al., Twentieth-century decline in streamflows from the hydrographic apex of North America. Journal of Hydrology, 2005. 306(1-4): p. 215-233.

1444. Rosa, C., et al., Heavy metal and mineral concentrations and their relationship to histopathological findings in the bowhead whale (Balaena mysticetus). Science of the Total Environment, 2008. 399(1-3): p. 165-178.

1445. Rose, K.D.E.J.J.M.M.C., Arcticanodon dawsonae, a primitive new palaeanodont from the lower Eocene of Ellesmere Island, Canadian High Arctic. Canadian Journal of Earth Sciences, 2004. 41(6): p. 757-763.

1446. Rothrock, D.A.P.D.B.W.M., The decline in arctic sea-ice thickness: Separating the spatial, annual, and interannual variability in a quarter century of submarine data. Journal of Geophysical Research C: Oceans, 2008. 113(5).

1447. Rothschild, R.F. and L.K. Duffy, Methylmercury in the hair of subsistence food users in a rural Alaskan village. Alaska Med, 2002. 44(1): p. 2-7.

1448. Roue, M., US environmental NGOs and the Cree. An unnatural alliance for the preservation of nature? International Social Science Journal, 2003. 55(178): p. 619-628.

1449. Roue, M. and D. Nakashima, Knowledge and foresight: the predictive capacity of traditional knowledge applied to environmental assessment. International Social Science Journal, 2002. 54(3): p. 337-+.

1450. Rouse, W.R., The energy and water balance of high-latitude wetlands: controls and extrapolation. Global Change Biology, 2000. 6: p. 59-68.

1451. Rouse, W.R., et al., The annual carbon budget for fen and forest in a wetland at Arctic treeline. Arctic, 2002. 55(3): p. 229-237.

1452. Rouse, W.R., P.M. Lafleur, and T.J. Griffis, Controls on energy and carbon fluxes from select high-latitude terrestrial surfaces. Physical Geography, 2000. 21(4): p. 345-367.

1453. Rousseau, D.D., et al., Long distance transport of pollen to Greenland. Geophysical Research Letters, 2003. 30(14).

1454. Rousseau, D.D., et al., Pollen record of rapidly changing air trajectories to the North Pole. Journal of Geophysical Research-Atmospheres, 2004. 109(D6).

1455. Rousseau, D.D., et al., New evidence of long distance pollen transport to southern Greenland in late spring. Review of Palaeobotany and Palynology, 2006. 141(3-4): p. 277-286.

1456. Rousseau, D.D., et al., Long-distance pollen transport from North America to Greenland in spring. Journal of Geophysical Research-Biogeosciences, 2008. 113(G2).

1457. Rozanska, M., et al., Influence of environmental factors on the development of bottom ice protist communities during the winter-spring transition. Marine Ecology-Progress Series, 2009. 386: p. 43-59.

1458. Rubicz, R., et al., Mitochondrial DNA variation and the origins of the Aleuts. Hum Biol, 2003. 75(6): p. 809-35.

1459. Rudels, B., et al., Atlantic sources of the Arctic Ocean surface and halocline waters. Polar Research, 2004. 23(2): p. 181-208.

1460. Rusiecki, J.A., et al., Global DNA Hypomethylation Is Associated with High Serum-Persistent Organic Pollutants in Greenlandic Inuit. Environmental Health Perspectives, 2008. 116(11): p. 1547-1552.

1461. Russell, J., Inuit student teachers' agency, positioning and symbolic action: reflections from a qallunaat on music teaching in the Canadian Arctic. International Journal of Music Education, 2006. 24(3): p. 231-242.

1462. Russell, J., What's to be done with the fox? Inuit teachers inventing musical games for inuit classrooms. Curriculum Inquiry, 2006. 36(1): p. 15-33.

1463. Rybczynski, N., M.R. Dawson, and R.H. Tedford, A semi-aquatic Arctic mammalian carnivore from the Miocene epoch and origin of Pinnipedia. Nature, 2009. 458(7241): p. 1021-1024.

1464. Rydell, J., H. Roininen, and K.W. Philip, Persistence of bat defence reactions in high Arctic moths (Lepidoptera). Proceedings of the Royal Society of London Series B-Biological Sciences, 2000. 267(1443): p. 553-557.

1465. Saalmann, K., et al., Structure of Palaeogene sediments in east Ellesmere Island: constraints on Eurekan tectonic evolution and implications for the Nares Strait problem. Tectonophysics, 2005. 406(1-2): p. 81-113.

1466. Saalmann, K.T.F.P.K.v.G.W., Structural evolution of tertiary rocks on judge daly promontory. Bulletin of the Geological Survey of Canada n592, 2009. 12(01): p. 305-323.

1467. Said, S.F., Northern exposure - A fresh mythic story to rival Tolkien's epic arrives with 'Atanarjuat The Fast Runner', a low-budget digital film made in Arctic conditions by Canadian Inuit director Zacharias Kunuk. Sight and Sound, 2002. 12(2): p. 22-25.

1468. Saku, J.C. and R.M. Bone, Looking for solutions in the Canadian North: modern treaties as a new strategy. Canadian Geographer-Geographe Canadien, 2000. 44(3): p. 259-270.

1469. Samchyshyna, L., L.A. Hansson, and K. Christoffersen, Patterns in the distribution of Arctic freshwater zooplankton related to glaciation history. Polar Biology, 2008. 31(12): p. 1427-1435.

1470. Samelius, G. and R.T. Alisauskas, Habitat alteration by geese at a large arctic goose colony: consequences for lemmings and voles. Canadian Journal of Zoology-Revue Canadienne De Zoologie, 2009. 87(1): p. 95-101.

1471. Samelius, G., et al., Foraging behaviours of wolverines at a large arctic goose colony. Arctic, 2002. 55(2): p. 148-150.

1472. Samelius, G., S. Lariviere, and R.T. Alisauskas, Immobilization of arctic foxes with tiletamine hydrochloride and zolazepam hydrochloride (Zoletil (R)). Wildlife Society Bulletin, 2003. 31(1): p. 192-196.

1473. Samelson, R.M. and P.L. Barbour, Low-Level Jets, Orographic Effects, and Extreme Events in Nares Strait: A Model-Based Mesoscale Climatology. Monthly Weather Review, 2008. 136(12): p. 4746-4759.

1474. Sammler, J.E., D.E. Andersen, and S.K. Skagen, Population trends of tundra-nesting birds at Cape Churchill, Manitoba, in relation to increasing goose populations. Condor, 2008. 110(2): p. 325-334.

1475. Sampei, M., et al., Seasonal and spatial variability in the flux of biogenic particles in the North Water, 1997-1998. Deep-Sea Research Part Ii-Topical Studies in Oceanography, 2002. 49(22-23): p. 5245-5257.

1476. Sampei, M.F.M.S.H.H.H.H.B.T., Fate of sinking particles, especially fecal pellets, within the epipelagic zone in the North Water (NOW) polynya of northern Baffin Bay. Marine Ecology Progress Series, 2004. 278: p. 17-25.

1477. Samson, D.O., N. Bhiry, and M. Lavoie, Late-Holocene palaeoecology of a polygonal peatland on the south shore of Hudson Strait, northern Quebec, Canada. Holocene, 2010. 20(4): p. 525-536.

1478. Sandanger, T.M., et al., Persistent organic pollutants in plasma of delivering women from Arkhangelsk. Sci Total Environ, 2003. 306(1-3): p. 171-8.

1479. Sandau, C.D., et al., Analysis of hydroxylated metabolites of PCBs (OH-PCBs) and other chlorinated phenolic compounds in whole blood from Canadian Inuit. Environmental Health Perspectives, 2000. 108(7): p. 611-616.

1480. Sarafanov, A.F.A.S.A.M.H.L.P., Recent changes in the Greenland-Scotland overflow-derived water transport inferred from hydrographic observations in the southern Irminger Sea. Geophysical Research Letters, 2009. 36(13).

1481. Sarafanov, A.S.A.F.A.D.A., Warming and salinification of intermediate and deep waters in the Irminger Sea and Iceland Basin in 1997-2006. Geophysical Research Letters, 2007. 34(23).

1482. Sarnthein, M., et al., Mid-Pliocene shifts in ocean overturning circulation and the onset of Quaternary-style climates. Climate of the Past, 2009. 5(2): p. 269-283.

1483. Sauer, P.E., G.H. Miller, and J.T. Overpeck, Oxygen isotope ratios of organic matter in arctic lakes as a paleoclimate proxy: field and laboratory investigations. Journal of Paleolimnology, 2001. 25(1): p. 43-64.

1484. Saulnier-Talbot, E. and R. Pienitz, Postglacial chironomid assemblage succession in northernmost Ungava Peninsula, Canada. Journal of Quaternary Science, 2010. 25(2): p. 203-213.

1485. Saulnier-Talbot, E., R. Pienitz, and T.W. Stafford, Establishing Holocene sediment core chronologies for northern Ungava lakes, Canada, using humic acids (AMS C-14) and Pb-210. Quaternary Geochronology, 2009. 4(4): p. 278-287.

1486. Saunders, P.A., et al., Copepod herbivory rate in a large arctic polynya and its relationship to seasonal and spatial variation in copepod and phytoplankton biomass. Marine Ecology-Progress Series, 2003. 261: p. 183-199.

1487. Savelle, J.M. and A.S. Dyke, Palaeoeskimo Demography on Western Boothia Peninsula, Arctic Canada. Journal of Field Archaeology, 2009. 34(3): p. 267-283.

1488. Savelle, J.M. and J. Habu, A processual investigation of a Thule whale bone house, Somerset Island, Arctic Canada. Arctic Anthropology, 2004. 41(2): p. 204-221.

1489. Savitt, R., Frederick Schwatka and the search tor the Franklin expedition records, 1878-1880. Polar Record, 2008. 44(230): p. 193-210.

1490. Sazhin, A.F., T.N. Rat'kova, and K.N. Kosobokova, Inhabitants of the White Sea coastal ice during the early Spring period. Oceanology, 2004. 44(1): p. 82-89.

1491. Schmidt, S. and U. Send, Origin and composition of seasonal Labrador sea freshwater. Journal of Physical Oceanography, 2007. 37(6): p. 1445-1454.

1492. Schoenhut, K.V.D.R.L.B.A., Cytological and ultrastructural preservation in Eocene Metasequoia leaves from the Canadian high arctic. American Journal of Botany, 2004. 91(6): p. 816-824.

1493. Schroth, R.J., The state of dental health in the north. Int J Circumpolar Health, 2006. 65(2): p. 98-100.

1494. Schuenemann, K.C.C.J.J.F.J., Synoptic forcing of precipitation over greenland: Climatology for 1961-99. Journal of Hydrometeorology, 2009. 10(1): p. 60-78.

1495. Schultz, M.F.J., et al., Queen Maud block: A newly recognized paleoproterozoic (2.4-2.5 Ga) terrane in northwest Laurentia. Geology, 2007. 35(8): p. 707-710.

1496. Schulz, M.P.M.K.A., Low-frequency oscillations of the Atlantic Ocean meridional overturning circulation in a coupled climate model. Climate of the Past Discussions, 2006. 2(5): p. 801-830.

1497. Schulz, M.P.M.K.A., Low-frequency oscillations of the Atlantic Ocean meridional overturning circulation in a coupled climate model. Climate of the Past, 2007. 3(1): p. 97-107.

1498. Scott, P.A. and I. Stirling, Chronology of terrestrial den use by polar bears in western Hudson Bay as indicated by tree growth anomalies. Arctic, 2002. 55(2): p. 151-166.

1499. Searles, E., INUIT IDENTITY IN THE CANADIAN ARCTIC. Ethnology, 2008. 47(4): p. 239-255.

1500. Segal, B. and B. Saylor, Social transition in the north: comparisons of drug-taking behavior among Alaska and Russian natives. Int J Circumpolar Health, 2007. 66(1): p. 71-6.

1501. Seidenkrantz, M.S.A.-S.S.S.H.K.A.J.K.G.K.H., Hydrography and climate of the last 4400 years in a SW Greenland fjord: Implications for Labrador Sea palaeoceanography. Holocene, 2007. 17(3): p. 387-401.

1502. Seidenkrantz, M.S.F.A.H.-C.C.R.L.K.A.M.M., Variable North Atlantic climate seesaw patterns documented by a late Holocene marine record from Disko Bugt, West Greenland. Marine Micropaleontology, 2008. 68(1): p. 66-83.

1503. Seidenkrantz, M.S.K.A.S.T., Comparing past and present climate - A tool to distinguish between natural and human-induced climate change. IOP Conference Series: Earth and Environmental Science 2009. 8.

1504. Seifried, S. and G. Veit-Kohler, Redescription of Bradya typica Boeck, 1873 (Copepoda: Harpacticoida: Ectinosomatidae) with the first description of the male. Helgoland Marine Research, 2010. 64(1): p. 1-20.

1505. Sejersen, F., Horizons of sustainability in Greenland: Inuit landscapes of memory and vision. Arctic Anthropology, 2004. 41(1): p. 71-89.

1506. Semenov, V.A. and L. Bengtsson, Modes of the wintertime Arctic temperature variability. Geophysical Research Letters, 2003. 30(15).

1507. Semkin, R.G., G. Mierle, and R.J. Neureuther, Hydrochemistry and mercury cycling in a High Arctic watershed. Science of the Total Environment, 2005. 342(1-3): p. 199-221.

1508. Semple, H.A., et al., Pharmacokinetics and tissue residues of Telazol in free-ranging polar bears. J Wildl Dis, 2000. 36(4): p. 653-62.

1509. Seppa, H., L.C. Cwynar, and G.M. Macdonald, Post-glacial vegetation reconstruction and a possible 8200 cal. yr BP event from the low arctic of continental Nunavut, Canada. Journal of Quaternary Science, 2003. 18(7): p. 621-629.

1510. Seuthe, L., et al., Winter-spring feeding and metabolism of Arctic copepods: insights from faecal pellet production and respiration measurements in the southeastern Beaufort Sea. Polar Biology, 2007. 30(4): p. 427-436.

1511. Shadian, J., In search of an identity Canada looks north. American Review of Canadian Studies, 2007. 37(3): p. 323-353.

1512. Shadwick, E.H.L.D.M.S.A.T.H.P.T.P.A.E.F., Carbon cycling in the Arctic Archipelago: The export of Pacific carbon to the North Atlantic. Biogeosciences Discussions, 2009. 6(1): p. 971-994.

1513. Sharma, S., et al., Variations and sources of the equivalent black carbon in the high Arctic revealed by long-term observations at Alert and Barrow: 1989-2003. Journal of Geophysical Research-Atmospheres, 2006. 111(D14).

1514. Sharma, S., et al., Long-term trends of the black carbon concentrations in the Canadian Arctic. Journal of Geophysical Research-Atmospheres, 2004. 109(D15).

1515. Sharp, G., et al., The potential for seaweed resource development in subarctic Canada; Nunavik, Ungava Bay. Journal of Applied Phycology, 2008. 20(5): p. 491-498.

1516. Shaverdo, H.V. and D.J. Giberson, Predaceous water beetles (Coleoptera : Adephaga : Dytiscidae, Gyrinidae) collected along the Horton and Thelon Rivers in the Arctic Central Barrens of Canada. Canadian Field-Naturalist, 2004. 118(3): p. 425-433.

1517. Shaw, J., D. Sharpe, and J. Harris, A flowline map of glaciated Canada based on remote sensing data. Canadian Journal of Earth Sciences, 2010. 47(1): p. 89-101.

1518. Shearman, R.K. and S.J. Lentz, Long-Term Sea Surface Temperature Variability along the US East Coast. Journal of Physical Oceanography, 2010. 40(5): p. 1004-1017.

1519. Shellnutt, J.G., J. Dostal, and J.D. Keppie, Petrogenesis of the 723 Ma Coronation sills, Amundsen basin, Arctic Canada: implications for the break-up of Rodinia. Precambrian Research, 2004. 129(3-4): p. 309-324.

1520. Shen, L., et al., Hexachlorocyclohexanes in the north American atmosphere. Environmental Science & Technology, 2004. 38(4): p. 965-975.

1521. Shephard, R.J., Fitness of Canadian children: range from traditional Inuit to sedentary city dwellers, and assessment of secular changes. Med Sport Sci, 2007. 50: p. 91-103.

1522. Shepherd, A.D.Z.B.T.J.D.J.A.M.E.M., Mass balance of Devon Ice Cap, Canadian Arctic. Annals of Glaciology, 2007. 46: p. 249-254.

1523. Sherlock, R.L., J.K.W. Lee, and B.L. Cousens, Geologic and geochronologic constraints on the timing of mineralization at the Nanisivik zinc-lead Mississippi valley-type deposit, northern Baffin Island, Nunavut, Canada. Economic Geology and the Bulletin of the Society of Economic Geologists, 2004. 99(2): p. 279-293.

1524. Sherwood, G.D.R.R.M.F.S.B.R.G.A., Influence of diet on growth, condition and reproductive capacity in Newfoundland and Labrador cod (Gadus morhua): Insights from stable carbon isotopes (&#x03B4;13C). Deep Sea Research Part II: Topical Studies in Oceanography Effects of Climate Viriability on Sub Arctic Marine Ecosystems A GLOBEC Symposium, 2007. 54(23): p. 2794-2809.

1525. Shindell, D.T., et al., Dynamic winter climate response to large tropical volcanic eruptions since 1600. Journal of Geophysical Research-Atmospheres, 2004. 109(D5).

1526. Shipilov, E.V., Generations of spreading basins and stages of breakdown of Wegener's pangea in the geodynamic evolution of the Arctic Ocean. Geotectonics, 2008. 42(2): p. 105-124.

1527. Short, C.M. and C.A. Suttle, Nearly identical bacteriophage structural gene sequences are widely distributed in both marine and freshwater environments. Appl Environ Microbiol, 2005. 71(1): p. 480-6.

1528. Shotyk, W.Z.J.K.M.Z.C.K.R.F.D., Predominance of industrial Pb in recent snow (1994-2004) and ice (1842-1996) from Devon Island, Arctic Canada. Geophysical Research Letters, 2005. 32(21): p. 1-4.

1529. Siciliano, S.D., et al., Adhesion and Enrichment of Metals on Human Hands from Contaminated Soil at an Arctic Urban Brownfield. Environmental Science & Technology, 2009. 43(16): p. 6385-6390.

1530. Siciliano, S.D.M.W.K.F.R.E.F.S., Nitrifier dominance of Arctic soil nitrous oxide emissions arises due to fungal competition with denitrifiers for nitrate. Soil Biology and Biochemistry, 2009. 41(6): p. 1104-1110.

1531. Simon, M., Inuit and the Canadian Arctic: Sovereignty Begins at Home. Journal of Canadian Studies-Revue D Etudes Canadiennes, 2009. 43(2): p. 250-260.

1532. Simonsen, C.S.G.A.C., Ovary development in Greenland halibut Reinhardtius hippoglossoides in west Greenland waters. Journal of Fish Biology, 2005. 67(5): p. 1299-1317.

1533. Simonsen, C.S.P.S.A.M.P.F.A., Feeding ecology of Greenland halibut and sandeel larvae off West Greenland. Marine Biology, 2006. 149(4): p. 937-952.

1534. Simonsen, C.S.T.M.A., Tagging mortality of Greenland Halibut Reinhardtius hippoglossoides (Walbaum). Journal of Northwest Atlantic Fishery Science, 2003. 31: p. 373-385.

1535. Simpson, K.G., et al., An annual study of inorganic and organic nitrogen and phosphorus and silicic acid in the southeastern Beaufort Sea. Journal of Geophysical Research-Oceans, 2008. 113(C7).

1536. Singleton, R., et al., Experience with the prevention of invasive Haemophilus influenzae type b disease by vaccination in Alaska: the impact of persistent oropharyngeal carriage. J Pediatr, 2000. 137(3): p. 313-20.

1537. Singleton, R., et al., The Alaska Haemophilus influenzae type b experience: lessons in controlling a vaccine-preventable disease. Pediatrics, 2006. 118(2): p. e421-9.

1538. Singleton, R., et al., Impact of immunizations on the disease burden of American Indian and Alaska native children. Arch Pediatr Adolesc Med, 2009. 163(5): p. 446-53.

1539. Singleton, R.J., et al., Invasive pneumococcal disease epidemiology and effectiveness of 23-valent pneumococcal polysaccharide vaccine in Alaska native adults. Vaccine, 2007. 25(12): p. 2288-95.

1540. Singleton, R.J., et al., Invasive pneumococcal disease caused by nonvaccine serotypes among alaska native children with high levels of 7-valent pneumococcal conjugate vaccine coverage. JAMA, 2007. 297(16): p. 1784-92.

1541. Sinshaw, A., et al., Biting flies and Trypanosoma vivax infection in three highland districts bordering lake Tana, Ethiopia. Veterinary Parasitology, 2006. 142(1-2): p. 35-46.

1542. Sistili, B., et al., An aboriginal perspective on the remediation of Mid-Canada Radar Line sites in the Subarctic: A partnership evaluation. Arctic, 2006. 59(2): p. 142-154.

1543. Siveter, D.J., J.C. Aitchison, and M.D. Sutton, The radiolaria of the Herefordshire Konservat-Lagerstatte (Silurian), England. Journal of Micropalaeontology, 2007. 26: p. 87-95.

1544. Skaarup, N.J.H.R.O.G., Margin segmentation of Baffin Bay/Davis Strait, eastern Canada based on seismic reflection and potential field data. Marine and Petroleum Geology, 2006. 23(1): p. 127-144.

1545. Skidmore, M., et al., Comparison of microbial community compositions of two subglacial environments reveals a possible role for microbes in chemical weathering processes. Applied and Environmental Microbiology, 2005. 71(11): p. 6986-6997.

1546. Skinner, K., R.M. Hanning, and L.J. Tsuji, Barriers and supports for healthy eating and physical activity for First Nation youths in northern Canada. Int J Circumpolar Health, 2006. 65(2): p. 148-61.

1547. Skomal, G.B. and G.W. Benz, Ultrasonic tracking of Greenland sharks, Somniosus microcephalus under Arctic ice. Marine Biology, 2004. 145(3): p. 489-498.

1548. Skopp, S., et al., Analysis of "total toxaphene" and selected single congeners in biota by ion trap HRGC-EI-MS/MS using congener-optimized parent ion dissociations. Environmental Science & Technology, 2002. 36(12): p. 2729-2735.

1549. Slattery, S.M. and R.T. Alisauskas, Distribution and habitat use of Ross's and lesser snow geese during late brood rearing. Journal of Wildlife Management, 2007. 71(7): p. 2230-2237.

1550. Smith, H.S., et al., Research with Arctic Peoples: Unique research opportunities in heart, lung, blood and sleep disorders - Working group summary and recommendations. International Journal of Circumpolar Health, 2006. 65(1): p. 79-90.

1551. Smith, I.R., Diamictic sediments within high Arctic lake sediment cores: evidence for lake ice rafting along the lateral glacial margin. Sedimentology, 2000. 47(6): p. 1157-1179.

1552. Smith, I.R., Diatom-based holocene paleoenvironmental records from continental sites on northeastern Ellesmere Island, high Arctic, Canada. Journal of Paleolimnology, 2002. 27(1): p. 9-28.

1553. Smith, J., P.S. Easton, and B.L. Saylor, Inupiaq Elders study: aspects of aging among male and female elders. Int J Circumpolar Health, 2009. 68(2): p. 182-96.

1554. Smith, J.N., et al., Iodine 129/CFC 11 transit times for Denmark Strait Overflow Water in the Labrador and Irminger Seas. Journal of Geophysical Research-Oceans, 2005. 110(C5).

1555. Smith, P.A., H.G. Gilchrist, and J.N.M. Smith, Effects of nest habitat, food, and parental behavior on shorebird nest success. Condor, 2007. 109(1): p. 15-31.

1556. Smith, P.A., et al., Annual variation in the benefits of a nesting association between Red Phalaropes (Phalaropus fulicarius) and Sabine's Gulls (Xema sabini). Auk, 2007. 124(1): p. 276-290.

1557. Smith, S.E., et al., Inferring population continuity versus replacement with aDNA: a cautionary tale from the Aleutian Islands. Hum Biol, 2009. 81(4): p. 407-26.

1558. Smith, S.V., R.S. Bradley, and M.B. Abbott, A 300 year record of environmental change from Lake Tuborg, Ellesmere Island, Nunavut, Canada. Journal of Paleolimnology, 2004. 32(2): p. 137-148.

1559. Smithwick, M., et al., Circumpolar study of perfluoroalkyl contaminants in polar bears (Ursus maritimus). Environmental Science & Technology, 2005. 39(15): p. 5517-5523.

1560. Smithwick, M., et al., Temporal trends of perfluoroalkyl contaminants in polar bears (Ursus maritimus) from two locations in the North American Arctic, 1972-2002. Environmental Science & Technology, 2006. 40(4): p. 1139-1143.

1561. Smithwick, M.S.K.R.M.D.G.G.M.S.A.M.J.W.S.C.D.R.B.E.W.L.R., Perflouroalkyl contaminants in liver tissue from East Greenland polar bears (Ursus maritimus). Environmental Toxicology and Chemistry, 2005. 24(4): p. 981-986.

1562. Smol, J.P. and B.F. Cumming, Tracking long-term changes in climate using algal indicators in lake sediments. Journal of Phycology, 2000. 36(6): p. 986-1011.

1563. Smylie, J., N. Kaplan-Myrth, and K. McShane, Indigenous knowledge translation: baseline findings in a qualitative study of the pathways of health knowledge in three indigenous communities in Canada. Health Promot Pract, 2009. 10(3): p. 436-46.

1564. Smylie, J., et al., Health sciences research and Aboriginal communities: pathway or pitfall? J Obstet Gynaecol Can, 2004. 26(3): p. 211-6.

1565. Soborg, B., et al., Ongoing tuberculosis transmission to children in Greenland. Eur Respir J, 2010.

1566. Soinen, L., S. Jarvinen, and E. Pukkala, Cancer incidence among Sami in Northern Finland, 1979-1998. International Journal of Cancer, 2002. 100(3): p. 342-346.

1567. Soininen, L. and E. Pukkala, Mortality of the Sami in Northern Finland 1979-2005. International Journal of Circumpolar Health, 2008. 67(1): p. 43-55.

1568. Sonne, C., et al., Multiple cytokine and acute-phase protein gene transcription in west Greenland sledge dogs (Canis familiaris) dietary exposed to organic environmental pollutants. Archives of Environmental Contamination and Toxicology, 2007. 53(1): p. 110-118.

1569. Sonne, C., et al., Enlarged clitoris in wild polar bears (Ursus maritimus) can be misdiagnosed as pseudohermaphroditism. Sci Total Environ, 2005. 337(1-3): p. 45-58.

1570. Sonne, C.D.R.K.M.M.P.L.P.S.J.A.L.L.R.J.S.S., Renal lesions in Greenland sledge dogs (Canis familiaris) exposed to a natural dietary cocktail of persistent organic pollutants. Toxicological and Environmental Chemistry, 2007. 89(3): p. 563-576.

1571. Soreide, J.E., et al., Seasonal food web structures and sympagic-pelagic coupling in the European Arctic revealed by stable isotopes and a two-source food web model. Progress in Oceanography, 2006. 71(1): p. 59-87.

1572. Sorensen, A.B., Stratigraphy, structure and petroleum potential of the Lady Franklin and Maniitsoq Basins, offshore southern West Greenland. Petroleum Geoscience, 2006. 12(3): p. 221-234.

1573. Spence, C. and A. Burke, Estimates of Canadian Arctic Archipelago runoff from observed hydrometric data. Journal of Hydrology, 2008. 362(3-4): p. 247-259.

1574. Spicer, C.W., et al., Molecular halogens before and during ozone depletion events in the Arctic at polar sunrise: concentrations and sources. Atmospheric Environment, 2002. 36(15-16): p. 2721-2731.

1575. Sproson, D.A.J.R.I.A.H.K.J., Atmospheric conditions associated with oceanic convection in the south-east Labrador Sea. Geophysical Research Letters, 2008. 35(6).

1576. Srivastava, D.S. and R.L. Jefferies, Intertidal plant communities of an Arctic salt marsh: The influence of isostatic uplift and herbivory. Ecoscience, 2002. 9(1): p. 112-118.

1577. St Aubin, D.J., et al., Hematology and plasma chemistry as indicators of health and ecological status in beluga whales, Delphinapterus leucas. Arctic, 2001. 54(3): p. 317-331.

1578. St. Louis, V.L.K.J.L.K.D.J.A.S.M.J.M.A.B.J.S.A.A.S.E.K., Some sources and sinks of monomethyl and inorganic mercury on ellesmere island in the canadian high arctic. Environmental Science and Technology, 2005. 39(8): p. 2686-2701.

1579. Stafford, K.M., et al., Bowhead whale springtime song off West Greenland. Journal of the Acoustical Society of America, 2008. 124(5): p. 3315-3323.

1580. Staiger, J.K.W., et al., Quaternary relief generation by polythermal glacier ice. Earth Surface Processes and Landforms, 2005. 30(9): p. 1145-1159.

1581. Staiger, J.W., et al., Glacial erosion and sediment dispersion from detrital cosmogenic nuclide analyses of till. Quaternary Geochronology, 2006. 1(1): p. 29-42.

1582. Stamford, M.D. and E.B. Taylor, Phylogeographical lineages of Arctic grayling (Thymallus arcticus) in North America: divergence, origins and affinities with Eurasian Thymallus. Molecular Ecology, 2004. 13(6): p. 1533-1549.

1583. Staniforth, R.J., Effects of urbanization on bird populations in the Canadian central Arctic. Arctic, 2002. 55(1): p. 87-93.

1584. Starkey, N.A.F.J.G.S.F.M.E.R.M.B.S.L.L.M., Helium isotopes in early Iceland plume picrites: Constraints on the composition of high 3He/4He mantle. Earth and Planetary Science Letters, 2009. 277(1): p. 91-100.

1585. Starliper, C.E., The effect of depuration on transmission of Aeromonas salmonicida between the freshwater bivalve Amblema plicata and Arctic char. Journal of Aquatic Animal Health, 2001. 13(1): p. 56-62.

1586. Steegmann, A.T., Jr., Human cold adaptation: an unfinished agenda. Am J Hum Biol, 2007. 19(2): p. 218-27.

1587. Steenbeek, A., et al., An Epidemiological Survey of Chlamydial and Gonococcal Infections in a Canadian Arctic Community. Sexually Transmitted Diseases, 2009. 36(2): p. 79-83.

1588. Steffen, A., et al., Atmospheric mercury concentrations: measurements and profiles near snow and ice surfaces in the Canadian Arctic during Alert 2000. Atmospheric Environment, 2002. 36(15-16): p. 2653-2661.

1589. Steffen, A., et al., Mercury in the Arctic atmosphere: An analysis of eight years of measurements of GEM at Alert (Canada) and a comparison with observations at Amderma (Russia) and Kuujjuarapik (Canada). Science of the Total Environment, 2005. 342(1-3): p. 185-198.

1590. Steffen, K. and J. Heinrichs, C-band SAR backscatter characteristics of Arctic Sea and land ice during winter. Atmosphere-Ocean, 2001. 39(3): p. 289-299.

1591. Stein, M., North Atlantic subpolar gyre warming - Impacts on Greenland offshore waters. Journal of Northwest Atlantic Fishery Science, 2006. 36: p. 43-54.

1592. Stenhouse, I.J., H.G. Gilchrist, and W.A. Montevecchi, Factors affecting nest-site selection of Sabine's Gulls in the eastern Canadian Arctic. Canadian Journal of Zoology-Revue Canadienne De Zoologie, 2005. 83(9): p. 1240-1245.

1593. Stenhouse, I.J. and G.J. Robertson, Philopatry, site tenacity, mate fidelity, and adult survival in Sabine's Gulls. Condor, 2005. 107(2): p. 416-423.

1594. Stenhouse, I.J., G.J. Robertson, and H.G. Gilchrist, Recoveries and survival rate of Ivory Gulls banded in Nunavut, Canada, 1971-1999. Waterbirds, 2004. 27(4): p. 486-492.

1595. Stern, G.A., et al., Spatial trends and factors affecting variation of organochlorine contaminants levels in Canadian Arctic beluga (Delphinapterus leucas). Science of the Total Environment, 2005. 351: p. 344-368.

1596. Stern, G.A.B.E.H.P.A.L.W.L.R.B.T.G.T.W.P.B.T.F.O.P.M., Modern and historical fluxes of halogenated organic contaminants to a lake in the Canadian arctic, as determined from annually laminated sediment cores. Science of the Total Environment Sources, Occurence, Trends and Pathways of Contaminants in the Arctic, 2005. 342(1): p. 223-243.

1597. Stern, P., Wage labor, housing policy, and the nucleation of Inuit households. Arctic Anthropology, 2005. 42(2): p. 66-81.

1598. Stevens, C.J.D.D.P.C.C., Copepod omnivory in the North Water Polynya (Baffin Bay) during autumn: Spatial patterns in lipid composition. Deep Sea Research Part I: Oceanographic Research Papers, 2004. 51(11): p. 1637-1658.

1599. Stewart, A., et al., Archaeology and oral history of Inuit land use on the Kazan River, Nunavut: A feature-based approach. Arctic, 2000. 53(3): p. 260-278.

1600. Stewart, K.A., S.F. Lamoureux, and B.P. Finney, Multiple ecological and hydrological changes recorded in varved sediments from Sanagak Lake, Nunavut, Canada. Journal of Paleolimnology, 2008. 40(1): p. 217-233.

1601. Stewart, K.A., S.F. Lamoureux, and A.C. Forbes, Hydrological controls on the diatom assemblage of a seasonal arctic river: Boothia Peninsula, Nunavut, Canada. Hydrobiologia, 2005. 544: p. 259-270.

1602. Stewart, R.E.A., Redefining walrus stocks in Canada. Arctic, 2008. 61(3): p. 292-308.

1603. Stirling, I., Polar bears and seals in the eastern Beaufort Sea and Amundsen Gulf: A synthesis of population trends and ecological relationships over three decades. Arctic, 2002. 55: p. 59-76.

1604. Stirling, I., et al., Polar bear distribution and abundance on the Southwestern Hudson Bay Coast during open water season, in relation to population trends and annual ice patterns. Arctic, 2004. 57(1): p. 15-26.

1605. Stirling, I.R.E.T.G.W., Quantitative support for a subjective fatness index for immobilized polar bears. Journal of Wildlife Management, 2008. 72(2): p. 568-574.

1606. Stock, N.L., et al., Perfluoroalkyl contaminants in the canadian arctic: Evidence of atmospheric transport and local contamination. Environmental Science & Technology, 2007. 41(10): p. 3529-3536.

1607. Stohl, A.F.C.L.C.S.K.T.K.Y.K.E.A.E.M.T.O.J.A.S.R.B.J.F., Pan-Arctic enhancements of light absorbing aerosol concentrations due to North American boreal forest fires during summer 2004. Journal of Geophysical Research D: Atmospheres, 2006. 111(22).

1608. Stokes, C.R., et al., Late pleistocene ice export events into the Arctic Ocean from the M'Clure Strait Ice Stream, Canadian Arctic Archipelago. Global and Planetary Change, 2005. 49(3-4): p. 139-162.

1609. Stokes, C.R., C.D. Clark, and R. Storrar, Major changes in ice stream dynamics during deglaciation of the north-western margin of the Laurentide Ice Sheet. Quaternary Science Reviews, 2009. 28(7-8): p. 721-738.

1610. Stokes, C.R., C.D. Clark, and M.C.M. Winsborrow, Subglacial bedform evidence for a major palaeo-ice stream and its retreat phases in Amundsen Gulf, Canadian Arctic Archipelago. Journal of Quaternary Science, 2006. 21(4): p. 399-412.

1611. St-Onge, M.R.V.G.J.A.M.G.A.A.S.D.J., Correlation of Archaean and Palaeoproterozoic units between northeastern Canada and western Greenland: Constraining the pre-collisional upper late accretionary history of the Trans-Hudson orogen. Geological Society London Special Publication, 2009. 318: p. 193-235.

1612. Stopp, M.P.E.m.m.s.s.c., Eighteenth century Labrador Inuit In England. Arctic, 2009. 62(1): p. 45-64.

1613. Storey, M.D.R.A.T.C., Timing and duration of volcanism in the North Atlantic Igneous Province: Implications for geodynamics and links to the Iceland hotspot. Chemical Geology The Great Plume Debate: Testing the Plume Theory, 2007. 241(3): p. 264-281.

1614. Stow, J.P., J. Sova, and K.J. Reimer, The relative influence of distant and local (DEW-line) PCB sources in the Canadian Arctic. Science of the Total Environment, 2005. 342(1-3): p. 107-118.

1615. Stransky, C., Geographic variation of golden redfish (Sebastes marinus) and deep-sea redfish (S. mentella) in the North Atlantic based on otolith shape analysis. Ices Journal of Marine Science, 2005. 62(8): p. 1691-1698.

1616. Strecker, A.L.M.R.A.S.E., Dispersal limitation and climate-related environmental gradients structure microcrustacean composition in freshwater lakes, Ellesmere Island, Canada. Canadian Journal of Fisheries and Aquatic Sciences, 2008. 65(9): p. 1905-1918.

1617. Strong, C., et al., Thermodynamic attributes of Arctic boundary layer ozone depletion. Atmospheric Environment, 2002. 36(15-16): p. 2641-2652.

1618. Strong, C. and G. Magnusdottir, Modeled winter sea ice variability and the North Atlantic Oscillation: a multi-century perspective. Climate Dynamics, 2010. 34(4): p. 515-525.

1619. Strong, C.M.G.S.H., Observed feedback between winter sea ice and the North Atlantic Oscillation. Journal of Climate, 2009. 22(22): p. 6021-6032.

1620. Strong, W.L. and L.V. Hills, Late-glacial and Holocene palaeovegetation zonal reconstruction for central and north-central North America. Journal of Biogeography, 2005. 32(6): p. 1043-1062.

1621. Su, Y., et al., Multi-year measurements of polybrominated diphenyl ethers (PBDEs) in the Arctic atmosphere. Atmospheric Environment, 2007. 41(38): p. 8725-8735.

1622. Su, Y.H.H.B.P.P.G.W.K.R.K.A.F.P.L.H.G.C.S.G.R.B.B.L., Spatial and seasonal variations of hexachlorocyclohexanes (HCHs) and hexachlorobenzene (HCB) in the arctic atmosphere. Environmental Science and Technology, 2006. 40(21): p. 6601-6607.

1623. Su, Y.H.H.B.P.P.G.W.K.R.K.A.F.P.L.H.G.C.S.G.R.B.B.L., A circumpolar perspective of atmospheric organochlorine pesticides (OCPs): Results from six Arctic monitoring stations in 2000-2003. Atmospheric Environment, 2008. 42(19): p. 4682-4698.

1624. Sugimoto, C., et al., JC virus strains indigenous to northeastern Siberians and Canadian Inuits are unique but evolutionally related to those distributed throughout Europe and Mediterranean areas. J Mol Evol, 2002. 55(3): p. 322-35.

1625. Suluk, T.K.B.S.L., Land claims and resistance to the management of harvester activities in Nunavut. Arctic 2008. 61(SUPPL. 1): p. 62-70.

1626. Sumner, A.L., et al., Atmospheric chemistry of formaldehyde in the Arctic troposphere at Polar Sunrise, and the influence of the snowpack. Atmospheric Environment, 2002. 36(15-16): p. 2553-2562.

1627. Sung, K., et al., N2O and O-3 arctic column amounts from PARIS-IR observations: Retrievals, characterization and error analysis. Journal of Quantitative Spectroscopy & Radiative Transfer, 2007. 107(3): p. 385-406.

1628. Sutcliffe, A.J.B.J.W.B.A.S.K.W.F.B.R.F.B.H.P.L.R.M.N.M.F.L., Biological activity on a decaying caribou antler at Cape Herschel, Ellesmere Island, Nunavut, high Arctic Canada. Polar Record, 2000. 36(198): p. 233-246.

1629. Sutherland, P.D., Preliminary results of archeological research on Fosheim Peninsula and in adjacent areas of western Ellesmere and eastern Axel Heiberg islands, Nunavut. Bulletin of the Geological Survey of Canada Environmental response to Climatic change in the Canadian High Arctic n529, 2000. 12(01): p. 319-324.

1630. Svoboda, F.P.F., A new glacier inventory on southern Baffin Island, Canada, from ASTER data: I. Applied methods, challenges and solutions. Annals of Glaciology, 2009. 50(53): p. 11-21.

1631. Swadling, K.M., et al., Biogeography of copepods in lakes and ponds of subarctic Quebec, Canada. Hydrobiologia, 2001. 453(1-3): p. 341-350.

1632. Swanson, H.K. and K.A. Kidd, Mercury Concentrations in Arctic Food Fishes Reflect the Presence of Anadromous Arctic Charr (Salvelinus alpinus), Species, and Life History. Environmental Science & Technology, 2010. 44(9): p. 3286-3292.

1633. Swanson, H.K., et al., Anadromy in Arctic populations of lake trout (Salvelinus namaycush): otolith microchemistry, stable isotopes, and comparisons with Arctic char (Salvelinus alpinus). Canadian Journal of Fisheries and Aquatic Sciences, 2010. 67(5): p. 842-853.

1634. Swanson, H.K., K.A. Kidd, and J.D. Reist, Effects of Partially Anadromous Arctic Charr (Salvelinus alpinus) Populations on Ecology of Coastal Arctic Lakes. Ecosystems, 2010. 13(2): p. 261-274.

1635. Sweet, A.R., Terrestrial Paleocene palynofloras, eastern Ellesmere Island, Arctic Canada. Bulletin of the Geological Survey of Canada n592, 2009. 12(01): p. 197-225.

1636. Sweetman, J.N., K.M. Ruhland, and J.P. Smol, Environmental and spatial factors influencing the distribution of cladocerans in lakes across the central Canadian Arctic treeline region. Journal of Limnology, 2010. 69(1): p. 76-87.

1637. Swenson, M.D., A story about suicide in the Arctic. JAMA, 2001. 286(8): p. 919.

1638. Swingedouw, D., et al., The impact of global freshwater forcing on the thermohaline circulation: adjustment of North Atlantic convection sites in a CGCM. Climate Dynamics, 2007. 28(2-3): p. 291-305.

1639. Szor, G.B.D.G.G., Finding the right home: Distribution of food resources and terrain characteristics influence selection of denning sites and reproductive dens in arctic foxes. Polar Biology, 2008. 31(3): p. 351-362.

1640. Szuma, E., Geographic variation of tooth and skull sizes in the arctic fox Vulpes (Alopex) lagopus. Annales Zoologici Fennici, 2008. 45(3): p. 185-199.

1641. Tadonleke, R.D., D. Planas, and M. Lucotte, Microbial food webs in boreal humic lakes and reservoirs: ciliates as a major factor related to the dynamics of the most active bacteria. Microb Ecol, 2005. 49(2): p. 325-41.

1642. Tam, D.Y., et al., The cost effectiveness of palivizumab in term Inuit infants in the Eastern Canadian Arctic. J Med Econ, 2009. 12(4): p. 361-70.

1643. Tam, L., P.G. Kevan, and J.T. Trevors, Viable bacterial biomass and functional diversity in fresh and marine waters in the Canadian Arctic. Polar Biology, 2003. 26(5): p. 287-294.

1644. Tang, C.C.L., et al., The circulation, water masses and sea-ice of Baffin Bay. Progress in Oceanography, 2004. 63(4): p. 183-228.

1645. Tang, C.C.L.D.E., Modeling annual variation of sea-ice cover in Baffin Bay. International Journal of Offshore and Polar Engineering 2007. 17(3): p. 176-181.

1646. Tanhua, T., K.A. Olsson, and E. Jeansson, Formation of Denmark Strait overflow water and its hydro-chemical composition. Journal of Marine Systems, 2005. 57(3-4): p. 264-288.

1647. Tanhua, T.B.K.R.M., Spreading of overflow water from the Greenland to the Labrador Sea. Geophysical Research Letters, 2005. 32(10): p. 1-4.

1648. Tao, W.J. and E.G. Boulding, Associations between single nucleotide polymorphisms in candidate genes and growth rate in Arctic charr (Salvelinus alpinus L.). Heredity, 2003. 91(1): p. 60-69.

1649. Tappe, S.H.L.M.S.A.S.A., The newly discovered Jurassic Tikiusaaq carbonatite-aillikite occurrence, West Greenland, and some remarks on carbonatite-kimberlite relationships. Lithos SUPPL, 2009. 112(1): p. 385-399.

1650. Tarasick, D.W. and J.W. Bottenheim, Surface ozone depletion episodes in the Arctic and Antarctic from historical ozonesonde records. Atmospheric Chemistry and Physics, 2002. 2: p. 197-205.

1651. Tarasov, L. and W.R. Peltier, A geophysically constrained large ensemble analysis of the deglacial history of the North American ice-sheet complex. Quaternary Science Reviews, 2004. 23(3-4): p. 359-388.

1652. Taylor, D.R.F. and S. Pyne, The history and development of the theory and practice of cybercartography. International Journal of Digital Earth, 2010. 3(1): p. 2-15.

1653. Taylor, M.K., et al., Delineating Canadian and Greenland polar bear (Ursus maritimus) populations by cluster analysis of movements. Canadian Journal of Zoology-Revue Canadienne De Zoologie, 2001. 79(4): p. 690-709.

1654. Taylor, M.K.L.J.M.P.D.F.S.H.M.F.B.E.W.R.-A.A.C.H.D.S.R., Demography and viability of a hunted population of polar bears. Arctic, 2005. 58(2): p. 203-214.

1655. Taylor, M.K.L.J.M.P.D.M.F.C.H.D., Mark-recapture and stochastic population models for polar bears of the high arctic. Arctic, 2008. 61(2): p. 143-152.

1656. Tedford Gold, S.K., Techniques of citizenship: Health and subjectivity in a new and predominantly inuit territory. Citizenship Studies, 2007. 11(4): p. 349-365.

1657. Tedford, R.H. and C.R. Harington, An Arctic mammal fauna from the Early Pliocene of North America. Nature, 2003. 425(6956): p. 388-390.

1658. Teller, J.T., D.W. Leverington, and J.D. Mann, Freshwater outbursts to the oceans from glacial Lake Agassiz and their role in climate change during the last deglaciation. Quaternary Science Reviews, 2002. 21(8-9): p. 879-887.

1659. Tenenbaum, D.J., Arctic climate: the heat is on. Environ Health Perspect, 2005. 113(2): p. A91.

1660. Tervo, O.M., S.E. Parks, and L.A. Miller, Seasonal changes in the vocal behavior of bowhead whales (Balaena mysticetus) in Disko Bay, Western-Greenland. J Acoust Soc Am, 2009. 126(3): p. 1570.

1661. Tessensohn, F.J.R.H.R.I.D., The tectonic evolution of Nares Strait: Implications of new data. Polarforschung, 2004. 74(1): p. 191-198.

1662. Tessensohn, F.P.K.v.G.W.S.K.M.U., Nares transform motion and Eurekan compression along the northeast coast of Ellesmere Island. Bulletin of the Geological Survey of Canada n592, 2009. 12(01): p. 227-243.

1663. Tester, F.J. and P. McNicoll, Isumagijaksaq: mindful of the state: social constructions of Inuit suicide. Social Science & Medicine, 2004. 58(12): p. 2625-2636.

1664. Tester, F.J. and P. McNicoll, 'Why don't they get it?' Talk of medicine as science. St Luke's Hospital, Panniqtuuq, Baffin Island. Social History of Medicine, 2006. 19(1): p. 87-106.

1665. Tester, F.J. and P. McNicoll, A Voice of Presence: Inuit Contributions toward the Public Provision of Health Care in Canada, 1900-1930. Histoire Sociale-Social History, 2008. 41(82): p. 535-561.

1666. Tews, J., Hummock vegetation at the arctic tree-line near Churchill, Manitoba. Canadian Field-Naturalist, 2004. 118(4): p. 590-594.

1667. Thayaparan, T. and J. MacDougall, Evaluation of ionospheric sporadic-E clutter in an arctic environment for the assessment of high-frequency surface-wave radar surveillance. Ieee Transactions on Geoscience and Remote Sensing, 2005. 43(5): p. 1180-1188.

1668. Thiemann, G.W., et al., Unusual fatty acid biomarkers reveal age- and sex-specific foraging in polar bears (Ursus maritimus). Canadian Journal of Zoology-Revue Canadienne De Zoologie, 2007. 85(4): p. 505-517.

1669. Thiemann, G.W. and S.J. Iverson, Variability in the blubber fatty acid composition of ringed seals (Phoca hispida) across the Canadian Arctic. Marine Mammal Science, 2007. 23(2): p. 241-261.

1670. Thiemann, G.W., S.J. Iverson, and I. Stirling, Seasonal, sexual and anatomical variability in the adipose tissue of polar bears (Ursus maritimus). Journal of Zoology, 2006. 269(1): p. 65-76.

1671. Thiemann, G.W., S.J. Iverson, and I. Stirling, Variation in blubber fatty acid composition among marine mammals in the Canadian Arctic. Marine Mammal Science, 2008. 24(1): p. 91-111.

1672. Thomas, E.K., Y. Axford, and J.P. Briner, Rapid 20th century environmental change on northeastern Baffin Island, Arctic Canada inferred from a multi-proxy lacustrine record. Journal of Paleolimnology, 2008. 40(1): p. 507-517.

1673. Thomas, E.K. and J.P. Briner, Climate of the past millennium inferred from varved proglacial lake sediments on northeast Baffin Island, Arctic Canada. Journal of Paleolimnology, 2009. 41(1): p. 209-224.

1674. Thomas, E.K., J. Szymanski, and J.P. Briner, Holocene alpine glaciation inferred from lacustrine sediments on northeastern Baffin Island, Arctic Canada. Journal of Quaternary Science, 2010. 25(2): p. 146-161.

1675. Thomas, F.C., I.A. Hardy, and H. Rashid, Bryozoan-rich layers in surficial Labrador Slope sediments, eastern Canadian Arctic. Canadian Journal of Earth Sciences, 2003. 40(3): p. 337-350.

1676. Thompson, D.K.W.M.K., Seasonal hydrochemistry of a high Arctic wetland complex. Hydrological Processes, 2009. 23(10): p. 1397-1407.

1677. Thornalley, D.J.R., H. Elderfield, and I.N. McCave, Holocene oscillations in temperature and salinity of the surface subpolar North Atlantic. Nature, 2009. 457(7230): p. 711-714.

1678. Thrane, K.B.J.C.J.N.A., Age, petrogenesis and metamorphism of the syn-collisional Pr&#x00F8;ven Igneous Complex, West Greenland. Contributions to Mineralogy and Petrology, 2005. 149(5): p. 541-555.

1679. Timmermann, R., et al., On the representation of high latitude processes in the ORCA-LIM global coupled sea ice-ocean model. Ocean Modelling, 2005. 8(1-2): p. 175-201.

1680. Timpson, A.M., Stretching the concept of representative bureaucracy: the case of Nunavut. International Review of Administrative Sciences, 2006. 72(4): p. 517-530.

1681. Todisco, D. and N. Bhiry, Micromorphology of periglacial sediments from the Tayara site, Qikirtaq Island, Nunavik (Canada). Catena, 2008. 76(1): p. 1-21.

1682. Todisco, D. and N. Bhiry, Palaeoeskimo site burial by solifluction: Periglacial geoarchaeology of the Tayara site (KbFk-7), Qikirtaq Island, Nunavik (Canada). Geoarchaeology-an International Journal, 2008. 23(2): p. 177-211.

1683. Todisco, D. and H. Monchot, Bone weathering in a periglacial environment: The Tayara site (KbFk-7), Qikirtaq island, Nunavik (Canada). Arctic, 2008. 61(1): p. 87-101.

1684. Tomkins, J.D.L.S.F.A.D.V.W.F., Sedimentology of perennial ice-covered, meromictic Lake A, Ellesmere Island, at the northern extreme of Canada. Canadian Journal of Earth Sciences, 2009. 46(2): p. 83-100.

1685. Tomkins, J.D.L.S.F.A.D.V.W.F., Sedimentary pellets as an ice-cover proxy in a High Arctic ice-covered lake. Journal of Paleolimnology, 2009. 41(1): p. 225-242.

1686. Toom-Sauntry, D. and L.A. Barrie, Chemical composition of snowfall in the high Arctic: 1990-1994. Atmospheric Environment, 2002. 36(15-16): p. 2683-2693.

1687. Tornabene, L.L., et al., Spaceborne visible and thermal infrared lithologic mapping of impact-exposed subsurface lithologies at the Haughton impact structure, Devon Island, Canadian High Arctic: Applications to Mars. Meteoritics & Planetary Science, 2005. 40(12): p. 1835-1858.

1688. Townsend, D.W., et al., A changing nutrient regime in the Gulf of Maine. Continental Shelf Research, 2010. 30(7): p. 820-832.

1689. Treacy, S.D., J.S. Gleason, and C.J. Cowles, Offshore distances of Bowhead whales (Balaena mysticetus) observed during fall in the Beaufort Sea, 1982-2000: An alternative interpretation. Arctic, 2006. 59(1): p. 83-90.

1690. Treble, M.A.D.K.S., Report of the Greenland halibut (Reinhardtius hippoglossoides) age determination workshop. NAFO Scientific Council Studies, 2008. 41: p. 1-90.

1691. Treffeisen, R., et al., A case study of the radiative effects of Arctic aerosols in March 2000. Atmospheric Environment, 2005. 39(5): p. 899-911.

1692. Trefry, S.A.D.D.L.H.A.K., A common eider x king eider hybrid captured on the Kent Peninsula, Nunavut. Arctic, 2007. 60(3): p. 251-254.

1693. Tremblay, G., et al., Late summer phytoplankton distribution along a 3500 km transect in Canadian Arctic waters: strong numerical dominance by picoeukaryotes. Aquatic Microbial Ecology, 2009. 54(1): p. 55-70.

1694. Tremblay, J.E., et al., Impact of the large-scale Arctic circulation and the North Water Polynya on nutrient inventories in Baffin Bay. Journal of Geophysical Research-Oceans, 2002. 107(C8).

1695. Tremblay, J.E., et al., Climatic and oceanic forcing of new, net, and diatom production in the North Water. Deep-Sea Research Part Ii-Topical Studies in Oceanography, 2002. 49(22-23): p. 4927-4946.

1696. Tremblay, J.E., et al., Trophic structure and pathways of biogenic carbon flow in the eastern North Water Polynya. Progress in Oceanography, 2006. 71(2-4): p. 402-425.

1697. Tremblay, J.E., et al., Vertical stability and the annual dynamics of nutrients and chlorophyll fluorescence in the coastal, southeast Beaufort Sea. Journal of Geophysical Research-Oceans, 2008. 113(C7).

1698. Treude, E., Moschusochsen-Bewirtschaftung in der kanadischen Arktis Translated Title: Muscox utilization in the Canadian Arctic. Polarforschung, 2002. 72(1): p. 1-16.

1699. Tripsanas, E.K.P.D.J.W., Glaciogenic debris-flow deposits of orphan basin, offshore eastern Canada: Sedimentological and rheological properties, origin, and relationship to meltwater discharge. Journal of Sedimentary Research, 2008. 78(11): p. 724-744.

1700. Tripsanas, E.K.P.D.J.W., Late Quaternary stratigraphy and sedimentology of Orphan Basin: Implications for meltwater dispersal in the southern Labrador Sea. Palaeogeography, Palaeoclimatology, Palaeoecology, 2008. 260(3): p. 521-539.

1701. Tsuji, L.J.S., et al., Spring-harvested game birds from the western James Bay region of northern Ontario, Canada: Organochlorine concentrations in breast muscle. Science of the Total Environment, 2007. 385(1-3): p. 160-171.

1702. Tsuji, L.J.S., et al., The Mid-Canada Radar Line and First Nations' People of the James Bay region, Canada: an evaluation using log-linear contingency modelling to analyze organochlorine frequency data. Journal of Environmental Monitoring, 2005. 7(9): p. 888-898.

1703. Tsuji, L.J.S., et al., Elevated blood-lead levels in First Nation people of northern Ontario Canada: Policy implications. Bulletin of Environmental Contamination and Toxicology, 2008. 80(1): p. 14-18.

1704. Tsuji, L.J.S., et al., Abandoned Mid-Canada Radar Line sites in the Western James region of Northern Ontario, Canada: A source of organochlorines for First Nations people? Science of the Total Environment, 2006. 370(2-3): p. 452-466.

1705. Tsuji, L.J.S.D.G., Endoparasites of Northern Sharp-Tailed Grouse, Tympanuchus phasianellus phasianellus, as Related to Age and Position on the Lek. Arctic, 2003. 56(3): p. 266-270.

1706. Turner, E.C., Mesoproterozoic carbonate systems in the Borden Basin, Nunavut. Canadian Journal of Earth Sciences, 2009. 46(12): p. 915-938.

1707. Ugolini, F.C., G. Corti, and G. Certini, Pedogenesis in the sorted patterned ground of Devon plateau, Devon Island, Nunavut, Canada. Geoderma, 2006. 136(1-2): p. 87-106.

1708. Ukita, J., et al., Northern Hemisphere sea ice variability: lag structure and its implications. Tellus Series a-Dynamic Meteorology and Oceanography, 2007. 59(2): p. 261-272.

1709. Ullgren, J.E. and M. White, Water mass interaction at intermediate depths in the southern Rockall Trough, northeastern North Atlantic. Deep-Sea Research Part I-Oceanographic Research Papers, 2010. 57(2): p. 248-257.

1710. Usher, P.J., Inuvialuit use of the Beaufort Sea and its resources, 1960-2000. Arctic, 2002. 55: p. 18-28.

1711. Utting, J., et al., Palynostratigraphy, lithostratigraphy and thermal maturity of the Lower Triassic Toad and Grayling, and Montney formations of western Canada, and comparisons with coeval rocks of the Sverdrup Basin, Nunavut. Bulletin of Canadian Petroleum Geology, 2005. 53(1): p. 5-24.

1712. Valery, L., M.C. Cadieux, and G. Gauthier, Spatial heterogeneity of primary production as both cause and consequence of foraging patterns of an expanding Greater Snow Goose colony. Ecoscience, 2010. 17(1): p. 9-19.

1713. van Aken, H.M., The hydrography of the mid-latitude Northeast Atlantic Ocean II: The intermediate water masses. Deep-Sea Research Part I-Oceanographic Research Papers, 2000. 47(5): p. 789-824.

1714. Van Caeseele, P., et al., Rapid pharmacotherapeutic intervention for an influenza A outbreak in the Canadian Arctic: lessons from the Sanikiluaq experience. Int J Circumpolar Health, 2001. 60(4): p. 640-8.

1715. Van de Velde, F., et al., Polar bear (Ursus maritimus) denning in the area of the Simpson Peninsula, Nunavut. Arctic, 2003. 56(2): p. 191-197.

1716. Van de Vijver, B., A. Van Kerckvoorde, and L. Beyens, Freshwater and terrestrial moss diatom assemblages of the Cambridge Bay area, Victoria Island (Nunavut, Canada). Nova Hedwigia, 2003. 76(1-2): p. 225-243.

1717. Van Hove, P.V.W.F.B.C.G.J.A.E., Coupled landscape-lake evolution in High Arctic Canada. Canadian Journal of Earth Sciences, 2006. 43(5): p. 533-546.

1718. Van Oostdam, J.C., et al., Circumpolar maternal blood contaminant survey, 1994-1997 organochlorine compounds. Science of the Total Environment, 2004. 330(1-3): p. 55-70.

1719. Vandermark, D., J.A. Tarduno, and D.B. Brinkman, Late Cretaceous plesiosaur teeth from Axel Heiberg Island, Nunavut, Canada. Arctic, 2006. 59(1): p. 79-82.

1720. Vandermark, D.T.J.A.B.D.B., A fossil champsosaur population from the high Arctic: Implications for Late Cretaceous paleotemperatures. Palaeogeography, Palaeoclimatology, Palaeoecology, 2007. 248(1): p. 49-59.

1721. Vardy, S.R., B.G. Warner, and T. Asada, Holocene environmental change in two polygonal peatlands, south-central Nunavut, Canada. Boreas, 2005. 34(3): p. 324-334.

1722. Vardy, S.R., et al., Carbon accumulation in permafrost peatlands in the Northwest Territories and Nunavut, Canada. Holocene, 2000. 10(2): p. 273-280.

1723. Vare, L.L., et al., Sea ice variations in the central Canadian Arctic Archipelago during the Holocene. Quaternary Science Reviews, 2009. 28(13-14): p. 1354-1366.

1724. Vasseur, C., et al., Effects of bio-optical factors on the attenuation of ultraviolet and photosynthetically available radiation in the North Water Polynya, northern Baffin Bay: ecological implications. Marine Ecology-Progress Series, 2003. 252: p. 1-13.

1725. Venegas, S.A. and L.A. Mysak, Is there a dominant timescale of natural climate variability in the Arctic? Journal of Climate, 2000. 13(19): p. 3412-3434.

1726. Verreault, J., et al., Chlorinated hydrocarbon contaminants and metabolites in polar bears (Ursus maritimus) from Alaska, Canada, East Greenland, and Svalbard: 1996-2002. Science of the Total Environment, 2005. 351: p. 369-390.

1727. Verreault, J., et al., Composition of chlorinated hydrocarbon contaminants among major adipose tissue depots of polar bears (Ursus maritimus) from the Canadian high Arctic. Science of the Total Environment, 2006. 370(2-3): p. 580-587.

1728. Viau, A.E. and K. Gajewski, Reconstructing Millennial-Scale, Regional Paleoclimates of Boreal Canada during the Holocene. Journal of Climate, 2009. 22(2): p. 316-330.

1729. Vidussi, F., et al., Spatial and temporal variability of the phytoplankton community structure in the North Water Polynya, investigated using pigment biomarkers. Canadian Journal of Fisheries and Aquatic Sciences, 2004. 61(11): p. 2038-2052.

1730. Vincent, A.C.V.W.F.M.D.R., Simulated heat storage in a perennially ice-covered high Arctic lake: Sensitivity to climate change. Journal of Geophysical Research C: Oceans, 2008. 113(4).

1731. Vincent, R.F. and R.F. Marsden, A Study of Tidal Influences in the North Water Polynya using Short Time Span Satellite Imagery. Arctic, 2008. 61(4): p. 373-380.

1732. Vincent, W.F., D.R. Mueller, and S. Bonilla, Ecosystems on ice: the microbial ecology of Markham Ice Shelf in the high Arctic. Cryobiology, 2004. 48(2): p. 103-12.

1733. Vinje, T., Anomalies and trends of sea-ice extent and atmospheric circulation in the Nordic Seas during the period 1864-1998. Journal of Climate, 2001. 14(3): p. 255-267.

1734. Vinogradov, G.M., Vertical distribution of large planktonic animals in the cold waters of the Labrador current north of the Gulf Stream Frontal Zone. Oceanology, 2000. 40(4): p. 525-531.

1735. Vipond, J.C.F., Experience at the Arctic bay nursing station on the coast of Baffin Island. Canadian Medical Association Journal, 2003. 169(12): p. 1305-1307.

1736. Vizi, Z.P.R., Reanaliza NCEP/NCAR i mozliwosci jej wykorzystania do badan rozk&#x0142;adu przestrzennego temperatury powietrza w Arktyce i Subarktyce Amerykanskiej Translated Title: NCEP/NCAR reanalysis and its usefulness in the study of the spatial distribution of air temperature in the American Arctic and Subarctic. Annales Universitatis Mariae Curie Sklodowska. Sectio B, 2006. 61: p. 436-445.

1737. Volodko, N.V., et al., Mitochondrial genome diversity in arctic Siberians, with particular reference to the evolutionary history of Beringia and Pleistocenic peopling of the Americas. Am J Hum Genet, 2008. 82(5): p. 1084-100.

1738. von Gosen, W.P.K.T.F.S.K., Eurekan fault tectonics on Judge Daly Promontory and their implications for displacements along Nares Strait. Bulletin of the Geological Survey of Canada n592, 2009. 12(01): p. 325-346.

1739. von Quillfeldt, C.H., W.G. Ambrose, and L.M. Clough, High number of diatom species in first-year ice from the Chukchi Sea. Polar Biology, 2003. 26(12): p. 806-818.

1740. Wacker, U., et al., A case study on a polar cold air outbreak over fram strait using a mesoscale weather prediction model. Boundary-Layer Meteorology, 2005. 117(2): p. 301-336.

1741. Wadley, M.R. and G.R. Bigg, Impact of flow through the Canadian Archipelago and Bering Strait on the north Atlantic and Arctic circulation: An ocean modelling study. Quarterly Journal of the Royal Meteorological Society, 2002. 128(585): p. 2187-2203.

1742. Wagner, I. and A.M. Simons, Divergence in germination traits among arctic and alpine populations of Koenigia islandica: light requirements. Plant Ecology, 2009. 204(1): p. 145-153.

1743. Walker, J.B., et al., Maternal and umbilical cord blood levels of mercury, lead, cadmium, and essential trace elements in Arctic Canada. Environmental Research, 2006. 100(3): p. 295-318.

1744. Walker, J.B., et al., Organochlorine levels in maternal and umbilical cord blood plasma in Arctic Canada. Science of the Total Environment, 2003. 302(1-3): p. 27-52.

1745. Walker, N.A., et al., The dynamics of nitrogen movement in an Arctic salt marsh in response to goose herbivory: a parameterized model with alternate stable states. Journal of Ecology, 2003. 91(4): p. 637-650.

1746. Walton, L.R., et al., Movement patterns of barren-ground wolves in the Central Canadian Arctic. Journal of Mammalogy, 2001. 82(3): p. 867-876.

1747. Walz, J., Tuberculosis prevention in the far north. 1956. Can Nurse, 2008. 104(6): p. 18-9.

1748. Wang, J. and M. Ikeda, Arctic oscillation and Arctic sea-ice oscillation. Geophysical Research Letters, 2000. 27(9): p. 1287-1290.

1749. Wang, J., M. Ikeda, and F.J. Saucier, A theoretical, two-layer, reduced-gravity model for descending dense water flow on continental shelves/slopes. Journal of Geophysical Research-Oceans, 2003. 108(C5).

1750. Wang, J., et al., A coupled ice-ocean model in the pan-Arctic and North Atlantic Ocean: Simulation of seasonal cycles. Journal of Oceanography, 2005. 61(2): p. 213-233.

1751. Wang, J., et al., Seesaw structure of subsurface temperature anomalies between the Barents Sea and the Labrador Sea. Geophysical Research Letters, 2004. 31(19).

1752. Wang, L., et al., Melt season duration on Canadian Arctic ice caps, 2000-2004. Geophysical Research Letters, 2005. 32(19).

1753. Wang, M.B.N.A.O.J.E., Comparison of atmospheric forcing in four sub-arctic seas. Deep Sea Research Part II: Topical Studies in Oceanography Effects of Climate Viriability on Sub Arctic Marine Ecosystems A GLOBEC Symposium, 2007. 54(23): p. 2543-2559.

1754. Wang, R.T.S.W.B.Y.Y.L.C.Z.Y.H.J.M.J.H.H., Sources and pathways of polycyclic aromatic hydrocarbons transported to alert, the Canadian High arctic. Environmental Science and Technology, 2010. 44(3): p. 1017-1022.

1755. Wangberg, S.A., et al., Inhibition of primary production by UV-B radiation in an arctic bay - model calculations. Aquatic Sciences, 2006. 68(2): p. 117-128.

1756. Wares, J.P., Biogeography of Asterias: North Atlantic climate change and speciation. Biological Bulletin, 2001. 201(1): p. 95-103.

1757. Watanabe, E. and H. Hasumi, Pacific Water Transport in the Western Arctic Ocean Simulated by an Eddy-Resolving Coupled Sea Ice-Ocean Model. Journal of Physical Oceanography, 2009. 39(9): p. 2194-2211.

1758. Watson, A., et al., Giving voice to wildlands visitors: Selecting indicators to protect and sustain experiences in the eastern arctic of Nunavut. Environmental Management, 2007. 40(6): p. 880-888.

1759. Weber, M.J.A.B.O.F.R.M.F.B., Geodetic GPS-based evaluation of present-day geodynamical movements and geoid in the Nares Strait region. Polarforschung, 2004. 74(1): p. 161-168.

1760. Webster, P., Arctic ecology. For precarious populations, pollutants present new perils. Science, 2003. 299(5613): p. 1642.

1761. Webster, P., Health in the Arctic Circle. Lancet, 2005. 365(9461): p. 741-2.

1762. Weckstrom, K., et al., The ecology of Pediastrum (Chlorophyceae) in subarctic lakes and their potential as paleobioindicators. Journal of Paleolimnology, 2010. 43(1): p. 61-73.

1763. Weese, S.R.B.F.O., Climate impacts of systematic errors in the simulation of the path of the North Atlantic Current. Geophysical Research Letters, 2006. 33(19).

1764. Weir, D.N., A.C. Kitchener, and R.Y. McGowan, Hybridization and changes in the distribution of Iceland gulls (Larus glaucoides kumlieni/thayeri). Journal of Zoology, 2000. 252: p. 517-530.

1765. Weladji, R.B. and O. Holand, Global climate change and reindeer: effects of winter weather on the autumn weight and growth of calves. Oecologia, 2003. 136(2): p. 317-23.

1766. Welker, J.M., et al., CO2 exchange in three Canadian High Arctic ecosystems: response to long-term experimental warming. Global Change Biology, 2004. 10(12): p. 1981-1995.

1767. Wennerberg, L., M. Klaassen, and A. Lindstrom, Geographical variation and population structure in the White-rumped Sandpiper Calidris fuscicollis as shown by morphology, mitochondrial DNA and carbon isotope ratios. Oecologia, 2002. 131(3): p. 380-390.

1768. Wenzel, G., Clyde inuit settlement and community: From before boas to centralization. Arctic Anthropology, 2008. 45(1): p. 1-21.

1769. Wenzel, G.W. and J.M. Savelle, Allen P. McCartney's contributions to Canadian archaeology: A photo essay. Arctic Anthropology, 2004. 41(2): p. 197-203.

1770. Werner, I., Seasonal dynamics of sub-ice fauna below pack ice in the Arctic (Fram Strait). Deep-Sea Research Part I-Oceanographic Research Papers, 2006. 53(2): p. 294-309.

1771. West, L., et al., High Lake gossan deposit: An Arctic analogue for ancient Martian surficial processes? Planetary and Space Science, 2009. 57(11): p. 1302-1311.

1772. West, R.G. and M.E. Pettit, Plant macroscopic remains from recent sediments of Banks Island, Northwest Territories, and Bathurst Island, Nunavut, Canada, and the interpretation of Quaternary cold stage plant macroscopic assemblages. Journal of Quaternary Science, 2000. 15(2): p. 177-184.

1773. Westover, K.S., et al., Physical and chemical limnology of a 61-lake transect across mainland Nunavut and southeastern Victoria Island, Central Canadian Arctic. Fundamental and Applied Limnology, 2009. 175(2): p. 93-112.

1774. White, G., Cultures in collision: Traditional knowledge and Euro-Canadian governance processes in northern land-claim boards. Arctic, 2006. 59(4): p. 401-414.

1775. Whitelaw, G.S.M.D.D.T.L.J.S., The Victor Diamond Mine environmental assessment process: A critical First Nation perspective. Impact Assessment and Project Appraisal, 2009. 27(3): p. 205-215.

1776. Whitridge, P., Zen fish: A consideration of the discordance between artifactual and zooarchaeological indicators of Thule Inuit fish use. Journal of Anthropological Archaeology, 2001. 20(1): p. 3-72.

1777. Whitridge, P., Landscapes, houses, bodies, things: "Place" and the archaeology of Inuit imaginaries. Journal of Archaeological Method and Theory, 2004. 11(2): p. 213-250.

1778. Whitridge, P., Reimagining the Iglu: Modernity and the Challenge of the Eighteenth Century Labrador Inuit Winter House. Archaeologies-Journal of the World Archaeological Congress, 2008. 4(2): p. 288-309.

1779. Wiese, F.K.R.G.J.G.A.J., Impacts of chronic marine oil pollution and the murre hunt in Newfoundland on thick-billed murre Uria lomvia populations in the eastern Canadian Arctic. Biological Conservation, 2004. 116(2): p. 205-216.

1780. Wilce, R.T., P.M. Pedersen, and S. Sekida, CHUKCHIA PEDICELLATA GEN. ET SP NOV AND C-ENDOPHYTICA NOV COMB., ARCTIC ENDEMIC BROWN ALGAE (PHAEOPHYCEAE). Journal of Phycology, 2009. 45(1): p. 272-286.

1781. Wilkinson, M.J., Y. Yai, and D.M. O'Brien, Age-related variation in red blood cell stable isotope ratios (delta13C and delta15N) from two Yupik villages in southwest Alaska: a pilot study. Int J Circumpolar Health, 2007. 66(1): p. 31-41.

1782. Willemse, N.W., Arctic natural archives. Nederlandse Geografische Studies artic natural archives n272, 2000. 11(14): p. 1-178.

1783. Williams, C.J., et al., Reconstruction of Tertiary Metasequoia forests. II. Structure, biomass, and productivity of Eocene floodplain forests in the Canadian Arctic. Paleobiology, 2003. 29(2): p. 271-292.

1784. Williams, C.J., et al., Structure, biomass, and productivity of a late Paleocene arctic forest. Proceedings of the Academy of Natural Sciences of Philadelphia, 2009. 158: p. 107-127.

1785. Williamson, S., et al., Iceberg calving rates from northern Ellesmere Island ice caps, Canadian Arctic, 1999-2003. Journal of Glaciology, 2008. 54(186): p. 391-400.

1786. Wilson, B.S., Colored gemstones from Canada. Rocks and Minerals, 2009. 85(1): p. 24-42.

1787. Wilson, D.J. and R.G. Bromley, Functional and numerical responses of predators to cyclic lemming abundance: effects on loss of goose nests. Canadian Journal of Zoology-Revue Canadienne De Zoologie, 2001. 79(3): p. 525-532.

1788. Wilson, E., Gender, nationalism, citizenship, and Nunavut's territorial "House": A case study of the gender parity proposal debate. Arctic Anthropology, 2005. 42(2): p. 82-94.

1789. Wilson, G.N., Nested federalism in Arctic Quebec: A comparative perspective. Canadian Journal of Political Science-Revue Canadienne De Science Politique, 2008. 41(1): p. 71-92.

1790. Wilson, J.Y.C.S.R.M.M.M.S.J.J.M.D.M.I.M.D.A.L.W.L., CYP1A localization in Beluga whales (Delphinapterus leucas) from the St. Lawrence Estuary and the Arctic. Marine Environmental Research, 2000. 50(1-5).

1791. Wilson, K. and T.K. Young, An overview of Aboriginal health research in the social sciences: current trends and future directions. Int J Circumpolar Health, 2008. 67(2-3): p. 179-89.

1792. Wilson, K.J.K.D.J.B.D.G., A case-study in tracking 1998 polynya ice dynamics in Smith Sound, North Water polynya region, Canadian Arctic, using RADARSAT-1 data. Annals of Glaciology Papers from the International Symposium on Sea Ice and its Interactions with the Ocean, Atmosphere and Biosphere held in Fairbanks, Alaska, USA, 2000. 33: p. 413-418.

1793. Wilson, R.W.M.K.J.W.H.R.E.K.K.E.S.v.G.J.A.M.C.J.A., Faults and fractures in central West Greenland: Onshore expression of continental break-up and sea-floor spreading in the Labrador - Baffin Bay Sea. Geological Survey of Denmark and Greenland Bulletin, 2006. 11: p. 185-204.

1794. Winther, G.D.G., Cooperative societies in Greenland and Nunavik: A lesson on the importance of supporting structures. Journal of Rural Cooperation, 2002. 30(1): p. 25-41.

1795. Witman, J.D., et al., THE RELATION BETWEEN PRODUCTIVITY AND SPECIES DIVERSITY IN TEMPERATE-ARCTIC MARINE ECOSYSTEMS. Ecology, 2008. 89(11): p. S66-S80.

1796. Wittig, N.P.D.G.W.M.O.C.J.I.G.J.N.G.M.K.M.J.S.M., Origin of cratonic lithospheric mantle roots: A geochemical study of peridotites from the North Atlantic Craton, West Greenland. Earth and Planetary Science Letters, 2008. 274(1): p. 24-33.

1797. Witting, L.B.E.W., An assessment of Greenland walrus populations. Ices Journal of Marine Science, 2005. 62(2): p. 266-284.

1798. Wlodarska-Kowalczuk, M., Molluscs in Kongsfjorden (Spitsbergen, Svalbard): a species list and patterns of distribution and diversity. Polar Research, 2007. 26(1): p. 48-63.

1799. Wlodarska-Kowalczuk, M.W.J.M., Impact of climate warming on Arctic benthic biodiversity: A case study of two Arctic glacial bays. Climate Research, 2001. 18(1): p. 127-132.

1800. Wohlleben, T.S.M.B.A., Factors influencing the basal temperatures of a High Arctic polythermal glacier. Annals of Glaciology, 2009. 50(52): p. 9-16.

1801. Wolfe, A.P., A 6500-year diatom record from southwestern Fosheim Peninsula, Ellesmere Island, Nunavut. Bulletin of the Geological Survey of Canada Environmental response to Climatic change in the Canadian High Arctic n529, 2000. 12(01): p. 249-256.

1802. Wolfe, A.P., Climate modulates the acidity of Arctic lakes on millennial time scales. Geology, 2002. 30(3): p. 215-218.

1803. Wolfe, A.P., Diatom community responses to late-Holocene climatic variability, Baffin Island, Canada: a comparison of numerical approaches. Holocene, 2003. 13(1): p. 29-37.

1804. Wolfe, A.P., C.A. Cooke, and W.O. Hobbs, Are current rates of atmospheric nitrogen deposition influencing lakes in the Eastern Canadian Arctic? Arctic Antarctic and Alpine Research, 2006. 38(3): p. 465-476.

1805. Wolfe, A.P., et al., Paleoecology of a > 90,000-year lacustrine sequence from Fog Lake, Baffin Island, Arctic Canada. Quaternary Science Reviews, 2000. 19(17-18): p. 1677-1699.

1806. Wolfe, A.P. and B.B. Perren, Chrysophyte microfossils record marked responses to recent environmental changes in high- and mid-arctic lakes. Canadian Journal of Botany-Revue Canadienne De Botanique, 2001. 79(6): p. 747-752.

1807. Wolfe, C.L.C.C., Laboratory experiments on eddy generation by a buoyant coastal current flowing over variable bathymetry. Journal of Physical Oceanography, 2006. 36(3): p. 395-411.

1808. Wolfe, P.M., Glacier hydrology in the Sawtooth range, Fosheim Peninsula, Ellesmere Island, Nunavut. Bulletin of the Geological Survey of Canada Environmental response to Climatic change in the Canadian High Arctic n529, 2000. 12(01): p. 375-390.

1809. Wolff, T., THE FIRST DANISH DEEP-SEA EXPEDITION ON THE INGOLF: 1895 AND 1896. Earth Sciences History, 2008. 27(2): p. 164-187.

1810. Wolken, G.J., J.H. England, and A.S. Dyke, Changes in late-Neoglacial perennial snow/ice extent and equilibrium-line altitudes in the Queen Elizabeth Islands, Arctic Canada. Holocene, 2008. 18(4): p. 615-627.

1811. Woo, M.K., McMaster River and Arctic hydrology. Physical Geography, 2000. 21(5): p. 466-484.

1812. Woo, M.K. and K.L. Young, Hydrogeomorphology of patchy wetlands in the High Arctic, polar desert environment. Wetlands, 2003. 23(2): p. 291-309.

1813. Woo, M.K.Y.K.L., Modeling arctic snow distribution and melt at the 1 km grid scale. Nordic Hydrology, 2004. 35(4): p. 295-307.

1814. Wooller, M.J., et al., Quantitative paleotemperature estimates from delta O-18 of chironomid head capsules preserved in arctic lake sediments. Journal of Paleolimnology, 2004. 31(3): p. 267-274.

1815. Woollett, J.M.H.A.S.W.C.P., Palaeoecological implications of archaeological seal bone assemblages: Case studies from Labrador and Baffin Island. Arctic, 2000. 53(4): p. 395-413.

1816. Worton, D.R.S.W.T.S.J.M.R.B.J.M.C.J., 20th century trends and budget implications of chloroform and related tri-and dihalomethanes inferred from firn air. Atmospheric Chemistry and Physics, 2006. 6(10): p. 2847-2863.

1817. Wright, S.C. and E. Bougie, Intergroup contact and minority-language education - Reducing language-based discrimination and its negative impact. Journal of Language and Social Psychology, 2007. 26(2): p. 157-181.

1818. Wright, S.C., D.M. Taylor, and J. Macarthur, Subtractive bilingualism and the survival of the Inuit language: Heritage- versus second-language education. Journal of Educational Psychology, 2000. 92(1): p. 63-84.

1819. Wroblewski, J.S., et al., The fish fauna of Gilbert Bay, Labrador: a marine protected area in the Canadian subarctic coastal zone. Journal of the Marine Biological Association of the United Kingdom, 2007. 87(2): p. 575-587.

1820. Wu, B.Y., R.H. Huang, and D.Y. Gao, Arctic sea ice bordering on the North Atlantic and interannual climate variations. Chinese Science Bulletin, 2001. 46(2): p. 162-165.

1821. Wu, B.Y. and J. Wang, Possible impacts of winter Arctic Oscillation on Siberian high, the East Asian winter monsoon and sea-ice extent. Advances in Atmospheric Sciences, 2002. 19(2): p. 297-320.

1822. Wu, B.Y., R.H. Zhang, and J. Wang, Dipole anomaly in the Arctic atmosphere and winter Arctic sea ice motion. Science in China Series D-Earth Sciences, 2005. 48(9): p. 1529-1536.

1823. Wu, P.L. and R. Wood, Convection induced long term freshening of the subpolar North Atlantic Ocean. Climate Dynamics, 2008. 31(7-8): p. 941-956.

1824. Wu, Q., et al., A high-latitude 8-hour wave in the mesosphere and lower thermosphere. Journal of Geophysical Research-Space Physics, 2005. 110(A9).

1825. Wu, Y.S., et al., A summer phytoplankton bloom triggered by high wind events in the Labrador Sea, July 2006. Geophysical Research Letters, 2008. 35(10).

1826. Wu, Y.T.C.C.L.P.T.S.S., The impact of bio-optical heating on the properties of the upper ocean: A sensitivity study using a 3-D circulation model for the Labrador Sea. Deep Sea Research Part II: Topical Studies in Oceanography Effects of Climate Viriability on Sub Arctic Marine Ecosystems A GLOBEC Symposium, 2007. 54(23): p. 2630-2642.

1827. Wulff, A., et al., Biodiversity, biogeography and zonation of marine benthic micro- and macroalgae in the Arctic and Antarctic. Botanica Marina, 2009. 52(6): p. 491-507.

1828. Yakovlev, N.G., Reproduction of the large-scale state of water and sea ice in the Arctic Ocean from 1948 to 2002: Part II. The state of ice and snow cover. Izvestiya Atmospheric and Oceanic Physics, 2009. 45(4): p. 478-494.

1829. Yakovlev, N.G., Reproduction of the large-scale state of water and sea ice in the Arctic Ocean in 1948-2002: Part I. Numerical model. Izvestiya Atmospheric and Oceanic Physics, 2009. 45(3): p. 357-371.

1830. Yamamoto, K.T.Y.H.M.U.J., Intra-seasonal relationship between the Northern Hemisphere sea ice variability and the North Atlantic Oscillation. Geophysical Research Letters, 2006. 33(14).

1831. Yamashita, N., et al., A global survey of perfluorinated acids in oceans. Mar Pollut Bull, 2005. 51(8-12): p. 658-68.

1832. Yamashita, N.T.S.P.G.W.S.L.P.K.S.G.T.K.K., Perfluorinated acids as novel chemical tracers of global circulation of ocean waters. Chemosphere, 2008. 70(7): p. 1247-1255.

1833. Yang, H.H.Y.L.Q.L.B.A.W.C.J., Biomolecular preservation of Tertiary Metasequoia Fossil Lagerstätten revealed by comparative pyrolysis analysis. Review of Palaeobotany and Palynology, 2005. 134(3): p. 237-256.

1834. Yao, T.T.C.L., The formation and maintenance of the North Water Polynya. Atmosphere Ocean, 2003. 41(3): p. 187-201.

1835. Yashayaev, I., Hydrographic changes in the Labrador Sea, 1960-2005. Progress in Oceanography, 2007. 73(3): p. 242-276.

1836. Yoon, J.H. and T.C. Chen, Maintenance of the boreal forest rainbelts during northern summer. Journal of Climate, 2006. 19(8): p. 1437-1449.

1837. You, Y., A global ocean climatological atlas of the Turner angle: implications for double-diffusion and water-mass structure. Deep-Sea Research Part I-Oceanographic Research Papers, 2002. 49(11): p. 2075-2093.

1838. You, Y.C.K.I.Y.J.Y.K.K.R., Thermocline circulation and ventilation of the East/Japan Sea, part I: Water-mass characteristics and transports. Deep Sea Research Part II: Topical Studies in Oceanography, 2010. 57(13): p. 1221-1246.

1839. Young, B.G., L.L. Loseto, and S.H. Ferguson, Diet differences among age classes of Arctic seals: evidence from stable isotope and mercury biomarkers. Polar Biology, 2010. 33(2): p. 153-162.

1840. Young, K.L., Role of snow in the hydrology of a High Arctic riparian wetland. Hydrology Research, 2008. 39(4): p. 277-286.

1841. Young, K.L.L.K., An investigation of cadmium and lead from a High Arctic waste disposal site, Resolute Bay, Nunavut, Canada. Nordic Hydrology 2006. 37(4-5): p. 441-453.

1842. Young, K.L.W.M.K., Hydrological environment of the Hot Weather Creek basin, Ellesmere Island, Nunavut. Bulletin of the Geological Survey of Canada Environmental response to Climatic change in the Canadian High Arctic n529, 2000. 12(01): p. 347-360.

1843. Young, K.L.W.M.K., Thermo-hydrological responses to an exceptionally warm, dry summer in a high arctic environment. Nordic Hydrology, 2003. 34(1): p. 51-70.

1844. Young, T.K., Are the circumpolar Inuit becoming obese? Am J Hum Biol, 2007. 19(2): p. 181-9.

1845. Young, T.K., et al., Type 2 diabetes mellitus in Canada's First Nations: status of an epidemic in progress. Canadian Medical Association Journal, 2000. 163(5): p. 561-566.

1846. Yunker, M.B., et al., Sources and significance of alkane and PAH hydrocarbons in Canadian arctic rivers. Estuarine Coastal and Shelf Science, 2002. 55(1): p. 1-31.

1847. Zabenskie, S. and K. Gajewski, Post-glacial climatic change on boothia peninsula, nunavut, Canada. Quaternary Research, 2007. 68(2): p. 261-270.

1848. Zdanowicz, C.M., et al., A holocene record of atmospheric dust deposition on the Penny ice cap, Baffin Island, Canada. Quaternary Research, 2000. 53(1): p. 62-69.

1849. Zdanowicz, C.M.F.D.A.C.I.L.D., An ice-marginal &#x03B4;18O record from Barnes Ice Cap, Baffin Island, Canada. Annals of Glaciology Papers from the International Symposium on Ice Cores and Climate held in Kangerlussuaq, Greenland, 2001. 35: p. 145-149.

1850. Zedel, L.C.-R.F.Y., Extracting fish and water velocity from Doppler profiler data. ICES Journal of Marine Science 2009. 66(9): p. 1846-1852.

1851. Zhadin, E.A., Possible causes of total ozone increase in some regions of the Northern and Southern Hemispheres in 1979-1992. Russian Meteorology and Hydrology n4, 2001. 12(01): p. 37-44.

1852. Zhang, T.B.R.G.H.W., Numerical simulations of the influence of the seasonal snow cover on the occurrence of permafrost at high latitudes. Norsk Geografisk Tidsskrift Mapping and Distribution Modelling of Mountain Permafrost, 2001. 55(4): p. 261-266.

1853. Zhang, Y.X. and E.C. Hunke, Recent Arctic change simulated with a coupled ice-ocean model. Journal of Geophysical Research-Oceans, 2001. 106(C3): p. 4369-4390.

1854. Zheng, J., et al., An ultra-clean firn core from the Devon Island Ice Cap, Nunavut, Canada, retrieved using a titanium drill specially designed for trace element studies. Journal of Environmental Monitoring, 2006. 8(3): p. 406-413.

1855. Zheng, J.C., et al., A 15,800-year record of atmospheric lead deposition on the Devon Island Ice Cap, Nunavut, Canada: Natural and anthropogenic enrichments, isotopic composition, and predominant sources. Global Biogeochemical Cycles, 2007. 21(2).

1856. Zhurbenko, M. and F.J.A. Daniels, New or rarely reported lichenicolous fungi and lichens from the Canadian Arctic. Mycotaxon, 2003. 88: p. 97-106.

1857. Zimmermann, C. and C. Lavoie, A paleoecological analysis of a southern permafrost peatland, Charlevoix, Quebec. Canadian Journal of Earth Sciences, 2001. 38(6): p. 909-919.

1858. Zlojutro, M., et al., Genetic structure of the Aleuts and Circumpolar populations based on mitochondrial DNA sequences: a synthesis. Am J Phys Anthropol, 2006. 129(3): p. 446-64.

1859. Zozulya, D.S.Y.K.K.R.E.K.C.F., Geology, age and geochemical constraints on the origin of the Late Archaean Mikkelvik alkaline stock, West Troms Basement Complex in Northern Norway. Norsk Geologisk Tidsskrift, 2009. 89(4): p. 327-340.

1860. Zrudlo, L., A search for cultural and contextual identity in contemporary Arctic architecture. Polar Record, 2001. 37(200): p. 55-66.

1861. Zuidema, P. and R. Joyce, Water vapor, cloud liquid water paths, and rain rates over northern high latitude open seas. Journal of Geophysical Research-Atmospheres, 2008. 113(D5).

1862. Zweng, M.M. and A. Munchow, Warming and freshening of Baffin Bay, 1916-2003. Journal of Geophysical Research-Oceans, 2006. 111(C7).

1863. Zyulyaeva Yu, A.Z.E.A., Analysis of three-dimensional eliassen-Palm fluxes in the lower stratosphere. Russian Meteorology and Hydrology, 2009. 34(8): p. 483-490.

**Table S4: Coding scheme used to review the included articles**

- Unique Article/Document ID Number: ______
- Lead Author: ________________________
- Article / Document Title:

_______________________________________________________________________

- Year Published: ________
- Journal: ________________________________________________________________
- A. First author affiliation:

1. Southern researcher (primary affiliation to non-northern institution)
2. Northern researcher (primary affiliation to northern institution) [[1]](#footnote-1)
3. Government
4. Non-northern NGO
5. Independent
6. Consultant

- B. Stakeholders involved in pursuing research (more than one may be chosen)

1. NGO
2. Co-management Agency
3. Inuit Organization (Regional/Local)
4. Government municipal/hamlet council
5. Government provincial / territorial level
6. Government Federal
7. Government international
8. Private companies
9. Educational and Research Institutions
10. Community actors
11. Vulnerable group – elderly
12. Vulnerable group – females
13. Vulnerable group – children
14. Vulnerable group – pre-existing disease burden
15. Vulnerable group – below societal average socio-economic status
16. Indigenous group specified

- C. Canada > Region / Province / Territory > City > locality of research focus:

______________________________________

1. Nunavut only
2. Nunavik only
3. Nunatsiavut only
4. Eastern Arctic
5. Canadian Arctic
6. International

- D1. Primary nature of research
  1. Traditional Knowledge (TK) documentation
  2. Physical sciences
  3. Social or health sciences
  4. Interdisciplinary – TK & sciences
  5. Interdisciplinary – Physical & social sciences
  6. Review/Editorial
- D2. Discipline
  1. TK documentation
  2. Physical
  3. Biological
  4. Social
  5. Health
  6. Interdisciplinary: Biol. & physical
  7. Interdisciplinary: Social/Health & Physical/Biological
  8. Interdisciplinary: Social or Health & TK
  9. Interdisciplinary: Biophysical & TK
  10. Review/Editorial
- D3. Sub Discipline affiliation of first author
  1. Anthropology/Sociology
  2. Geography/Environmental Studies
  3. Ecology/Biology/Resource Management
  4. Health
  5. Political Science
  6. Earth sciences (Atmospheric/Ocean/Marine/Glaciology/Geology/etc.)
- E. Involvement of community actors in research
  1. Study authorship
  2. Support researchers
  3. Participatory role (e.g. acknowledged, workshops, interviews, or documentation of TK)
  4. Not applicable N/A
- F. Social science research methods
  1. Qualitative methods (e.g. interviews, small-sample surveys – n<30)
  2. Quantitative methods (e.g. large sample surveys, n>30; census data analysis)
  3. Combination of qualitative and quantitative
  4. Not applicable N/A
- G. Scale of focus/sample

1. Individual level / Household level
2. Government Municipality level / Community level
3. Regional level / territorial level
4. National level / two or more territories level
5. International level (e.g. Canadian Arctic and Russian / Northern Europe Arctic

- H. Primary stimulus for research question

1. Climate change – temperature focus
2. Climate change – sea ice focus
3. Climate change – precipitation focus
4. Climate change – sea level rise
5. Climate change – extreme storm events
6. Climate change – general / unspecified stimulus
7. Climate change – land management, environmental protection, impact assessment
8. Climate change – food security
9. Environmental question (primarily non-climate change related)
10. Social question
11. Economic question
12. Political question

- I. Current human vulnerabilities
  1. Identifies current exposure sensitivities
  2. Identifies current adaptation capacities
  3. Both 1 & 2
  4. No explicit current vulnerability focus
- J. Future human vulnerabilities
  1. Identifies future exposure sensitivities
  2. Addresses future adaptive capacities
  3. Both 1 & 2
  4. No explicit future vulnerability focus
- K. Documented implementation of adaptive measures (more than one may be chosen)
  1. Yes – at household or individual level
  2. Yes – at community level
  3. Yes – at regional level
- L. Sector focus (more than one may be chosen)
  1. Infrastructure and transportation
  2. Economy and business
  3. Health and well-being
  4. Subsistence hunter and trapping
  5. Culture and education
  6. Institutional/Resource management
- M. Indigenous Group(s) (more than one, or none, may be chosen)
  1. Inuit
  2. Cree specified
  3. Metis specified
  4. First Nations
- N. Data characteristics
  1. Primary data collection – contribution to existing knowledge
  2. Primary data collection – baseline
  3. Secondary data – including reviews of primary research
  4. N/A

1. Non-northern institutions consist of those not based in Nunavut, Nunatsiavut, Nunavik, or the ISR. [↑](#footnote-ref-1)
